# Supplementary material for: Sociodemographic and lifestyle predictors of incident hospital admissions with multimorbidity in a general population, 1999–2019: the EPIC-Norfolk cohort
Source: PubMed Central journal article supplement (PMC7509968; doi:10.1136/bmjopen-2020-042115), 2020-09-22
Supplement: bmjopen-2020-042115.draft_revisions.pdf [file bmjopen-2020-042115.draft_revisions.pdf]

# BMJ Open

BMJ Open is committed to open peer review. As part of this commitment we make the peer review history of every article we publish publicly available.

When an article is published we post the peer reviewers' comments and the authors' responses online. We also post the versions of the paper that were used during peer review. These are the versions that the peer review comments apply to.

The versions of the paper that follow are the versions that were submitted during the peer review process. They are not the versions of record or the final published versions. They should not be cited or distributed as the published version of this manuscript.

BMJ Open is an open access journal and the full, final, typeset and author-corrected version of record of the manuscript is available on our site with no access controls, subscription charges or pay-per-view fees (<http://bmjopen.bmj.com>).

If you have any questions on BMJ Open's open peer review process please email [info.bmjopen@bmj.com](mailto:info.bmjopen@bmj.com)

# BMJ Open

## Sociodemographic and lifestyle predictors of incident hospital admissions with multimorbidity in a general population 1999–2019: the EPIC-Norfolk cohort

|                               |                                                                                                                                                                                                                                                                                                                                                                                                                                                                                                                                                         |
|-------------------------------|---------------------------------------------------------------------------------------------------------------------------------------------------------------------------------------------------------------------------------------------------------------------------------------------------------------------------------------------------------------------------------------------------------------------------------------------------------------------------------------------------------------------------------------------------------|
| Journal:                      | <i>BMJ Open</i>                                                                                                                                                                                                                                                                                                                                                                                                                                                                                                                                         |
| Manuscript ID                 | bmjopen-2020-042115                                                                                                                                                                                                                                                                                                                                                                                                                                                                                                                                     |
| Article Type:                 | Original research                                                                                                                                                                                                                                                                                                                                                                                                                                                                                                                                       |
| Date Submitted by the Author: | 25-Jun-2020                                                                                                                                                                                                                                                                                                                                                                                                                                                                                                                                             |
| Complete List of Authors:     | Luben, Robert; University of Cambridge School of Clinical Medicine, Department of Public Health and Primary Care<br>Hayat, Shabina; University of Cambridge School of Clinical Medicine, Department of Public Health and Primary Care<br>Wareham, Nicholas; University of Cambridge School of Clinical Medicine, MRC Epidemiology Unit<br>Pharoah, Paul; University of Cambridge School of Clinical Medicine, Department of Public Health and Primary Care<br>Khaw, Kay-Tee; University of Cambridge School of Clinical Medicine, MRC Epidemiology Unit |
| Keywords:                     | EPIDEMIOLOGY, Health policy < HEALTH SERVICES ADMINISTRATION & MANAGEMENT, SOCIAL MEDICINE                                                                                                                                                                                                                                                                                                                                                                                                                                                              |
|                               |                                                                                                                                                                                                                                                                                                                                                                                                                                                                                                                                                         |

SCHOLARONE™  
Manuscripts

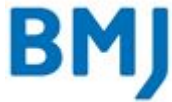

I, the Submitting Author has the right to grant and does grant on behalf of all authors of the Work (as defined in the below author licence), an exclusive licence and/or a non-exclusive licence for contributions from authors who are: i) UK Crown employees; ii) where BMJ has agreed a CC-BY licence shall apply, and/or iii) in accordance with the terms applicable for US Federal Government officers or employees acting as part of their official duties; on a worldwide, perpetual, irrevocable, royalty-free basis to BMJ Publishing Group Ltd ("BMJ") its licensees and where the relevant Journal is co-owned by BMJ to the co-owners of the Journal, to publish the Work in this journal and any other BMJ products and to exploit all rights, as set out in our [licence](#).

The Submitting Author accepts and understands that any supply made under these terms is made by BMJ to the Submitting Author unless you are acting as an employee on behalf of your employer or a postgraduate student of an affiliated institution which is paying any applicable article publishing charge ("APC") for Open Access articles. Where the Submitting Author wishes to make the Work available on an Open Access basis (and intends to pay the relevant APC), the terms of reuse of such Open Access shall be governed by a Creative Commons licence – details of these licences and which [Creative Commons](#) licence will apply to this Work are set out in our licence referred to above.

Other than as permitted in any relevant BMJ Author's Self Archiving Policies, I confirm this Work has not been accepted for publication elsewhere, is not being considered for publication elsewhere and does not duplicate material already published. I confirm all authors consent to publication of this Work and authorise the granting of this licence.

# Sociodemographic and lifestyle predictors of incident hospital admissions with multimorbidity in a general population 1999–2019: the EPIC-Norfolk cohort

Robert Luben<sup>1</sup>, Shabina Hayat<sup>1</sup>, Nicholas Wareham<sup>2</sup>, Paul Pharoah<sup>1</sup>, Kay-Tee Khaw<sup>1</sup>

*1 Department of Public Health and Primary Care, Institute of Public Health, University of Cambridge, Cambridge, United Kingdom*

*2 MRC Epidemiology Unit, University of Cambridge School of Clinical Medicine, Cambridge United Kingdom*

*Correspondence to: Robert Luben, Department of Public Health and Primary Care, Strangeways Research Laboratory, Worts Causeway, Cambridge, UK. Email: [robert.luben@phpc.cam.ac.uk](mailto:robert.luben@phpc.cam.ac.uk) Telephone: +44 (0)1223 748691*

*June 22, 2020*

For peer review only

## Abstract

### Background

The ageing population and prevalence of long-term disorders with multimorbidity is a major health challenge worldwide. The associations between comorbid conditions and mortality risk are well established; however, few prospective community-based studies have reported on prior risk factors for incident hospitalisations with multimorbidity. We aimed to explore the independent associations for a range of demographic, lifestyle and physiological determinants and the likelihood of subsequent hospital incident multimorbidity.

### Methods

We examined incident hospital admissions with multimorbidity in 25014 men and women aged 40–79 in a British prospective population-based study recruited 1993–1997 and followed-up until 2019. The determinants of incident multimorbidity, defined as Charlson Comorbidity Index  $\geq 3$ , were investigated using multivariable models for the 10-year period 1999–2009 and repeated with independent measurements in a second 10-year period 2009–2019.

### Results

Between 1999–2009 18179 participants (73% of the population) had a hospital admission. Baseline 5-year and 10-year incident multimorbidity were observed in 13% and 21% of participants respectively. Age per 10-year increase OR 2.19 (95%CI 2.06–2.33) and male sex OR 1.32 (95%CI 1.19–1.47) predicted incident multimorbidity over 10 years. In the subset free of the most serious diseases at baseline, current smoking OR 1.74 (95%CI 1.52–2.00), BMI  $>30$  kg/m<sup>2</sup> OR 1.40 (95%CI 1.24–1.58) and physical inactivity OR 1.14 (95%CI 1.04–1.26) were positively associated and plasma vitamin C (a biomarker of plant food intake) per SD increase OR 0.85 (95%CI 0.81–0.89) inversely associated with incident 10-year multimorbidity after multivariable adjustment for age, sex, social class, education, alcohol consumption, systolic blood pressure and cholesterol. Results were similar when re-examined for a further time period 2009–2019.

### Conclusion

Age, male sex and potentially modifiable lifestyle behaviours including smoking, body mass index, physical inactivity and low fruit and vegetable intake were associated with increased risk of future incident hospital admissions with multimorbidity.

## Article summary

### Strengths and limitations of this study

- The majority of patients in secondary care are elderly and have multiple chronic conditions.
- Multimorbidity predicts future increased mortality but most studies are conducted in individuals who access health care.
- Cross-sectional studies have reported associations with lifestyle factors but there are few prospective population-based studies of predictors of future multimorbidity.
- In this population-based prospective study, followed-up over 20 years, we examined the likelihood of hospitalisation with multimorbidity by demographic characteristics including age and sex.
- We examined the demographic, lifestyle and physiological risk factors that predict incident multimorbidity in 5 and 10-year periods spanning 20 years and identified potentially modifiable lifestyle factors such as smoking, obesity, physical inactivity and low plant food intake.

**Acknowledgements:** *The authors would like to thank the participants, general practitioners, and staff of EPIC-Norfolk.*

**Contributors:** *KTK, NW, SH and RL were involved in the conception and design of the study. RL drafted the manuscript, with support from KTK and PP. SH contributed to data interpretation. RL was responsible for external data linkage. SH and RL contributed to data collection and acquisition. All authors read and critically revised the manuscript and approved the final manuscript. RL is the guarantor. The corresponding author attests that all listed authors meet authorship criteria and that no others meeting the criteria have been omitted.*

**Funding:** *The design and conduct of the EPIC-Norfolk study and collection and management of the data was supported by programme grants from the Medical Research Council UK (G9502233, G0401527) and Cancer Research UK (C864/A8257, C864/A2883).*

**Competing interests:** *All authors have completed the ICMJE uniform disclosure form at [www.icmje.org/coi\\_disclosure.pdf](http://www.icmje.org/coi_disclosure.pdf) and report: RL, SH, KTK and NW report grants from MRC and CRUK during the conduct of the study; The sponsors had no role in any of the following: study design, data collection, data analysis, interpretation of data, writing of the article, decision to submit it for publication. All authors are independent of funders and sponsors and had access to all the data. No conflicts of interest were declared by any author (apart from the two grants) and they have no other relationships or activities that could appear to have influenced the submitted work.*

**Ethical approval:** *The work was approved by the East Norfolk and Waveney NHS research governance committee (2005EC07L) and the Norfolk research ethics committee (05/Q0101/191). All participants gave informed signed consent for study participation including access to medical records.*

**Data sharing:** *The authors will make the dataset available under a Data Transfer Agreement to any bona fide researcher who wishes to obtain the dataset in order to undertake a replication analysis. Although the dataset is anonymised, the breadth of the data included and the multiplicity of variables that are included in this analysis file as primary variables or confounding factors, means that provision of the dataset to other researchers without a Data Transfer Agreement would constitute a risk. Requests for data sharing/access should be submitted to the EPIC Management Committee ([epic-norfolk@mrc-epid.cam.ac.uk](mailto:epic-norfolk@mrc-epid.cam.ac.uk))*

**Transparency:** *The lead author (the manuscript's guarantor) affirms that the manuscript is an honest, accurate, and transparent account of the study being reported; that no important aspects of the study have been omitted; and that any discrepancies from the study as planned (and, if relevant, registered) have been explained.*

**Open access:** *This is an Open Access article distributed in accordance with the terms of the Creative Commons Attribution (CC BY 4.0) license, which permits others to distribute, remix, adapt and build upon this work, for commercial use, provided the original work is properly cited. See: <http://creativecommons.org/licenses/by/4.0/>*

**Patient and public involvement:** *The EPIC-Norfolk Study have an active Participants Advisory Panel which meets quarterly to advise on research protocols, suggest ideas and provide feedback on the research including proposed new studies and collaborations. All participants of the EPIC-Norfolk study are informed about the study through regular newsletters as well as public meetings. Information is also disseminated through local community talks in the Norfolk area and science festivals.*

**Exclusive licence:** *The Corresponding Author has the right to grant on behalf of all authors and does grant on behalf of all authors, a worldwide licence to the Publishers and its licensees in perpetuity, in all forms, formats and media (whether known*

1  
2  
3  
4  
5  
6  
7  
8  
9  
10  
11  
12  
13  
14  
15  
16  
17  
18  
19  
20  
21  
22  
23  
24  
25  
26  
27  
28  
29  
30  
31  
32  
33  
34  
35  
36  
37  
38  
39  
40  
41  
42  
43  
44  
45  
46  
47  
48  
49  
50  
51  
52  
53  
54  
55  
56  
57  
58  
59  
60

*now or created in the future), to i) publish, reproduce, distribute, display and store the Contribution, ii) translate the Contribution into other languages, create adaptations, reprints, include within collections and create summaries, extracts and/or, abstracts of the Contribution, iii) create any other derivative work(s) based on the Contribution, iv) to exploit all subsidiary rights in the Contribution, v) the inclusion of electronic links from the Contribution to third party material where-ever it may be located; and, vi) licence any third party to do any or all of the above.*

For peer review only

## Introduction

The Academy of Medical Sciences 2018 report highlighted multimorbidity as a global priority for research. Patients with multimorbidity experience reduced wellbeing and quality of life and account for a disproportionately high share of healthcare workload and costs. Management of the rising prevalence of long-term disorders is the main challenge facing health-care systems worldwide. [1–3]

Multimorbidity is commonly defined as the presence of multiple diseases or conditions with a cut-off of two or more conditions [4], however there is no agreed definition or classification system, which makes the existing evidence base difficult to interpret. [1] The term comorbidity predates multimorbidity and was used to predict the effect of additional diseases for those with an index disease of interest. [5–7] The Charlson Comorbidity Index (CCI) [8] was originally created to predict mortality in hospital patients after one year and is defined using a set of 17 chronic diseases, weighted according to the risk of death. The index has been widely used with several authors suggesting extensions or modifications to the original definition [9–14] and it remains a common standard to which other systems are often compared. [15]

The associations between comorbid conditions and mortality are well established. [16–20] However, few studies have examined the determinants of incident multimorbidity rather than its consequences [21–26] since most lack detailed demographic, socioeconomic and physiological measurements in population-based men and women prior to the onset of multimorbid disease with subsequent follow-up. Retrospective hospital-based studies examining multimorbidity lack community-based denominators while general practice-based studies are often cross-sectional or examine mortality in already multimorbid patients. Few studies examine factors that predict the likelihood of multimorbidity rather than factors that predict risk of individual component conditions. The large majority of studies conducted to date are cross-sectional, with few prospective community-based studies able to examine incident multimorbidity from subsequent hospitalisation. [1,24,25] In this study, we examine the independent associations for a range of demographic, lifestyle and physiological determinants and the likelihood of subsequent hospital incident multimorbidity. We use the CCI over 5-year and 10-year time periods and re-examine these associations independently in a subset 12 years after baseline since health care policy and the criteria used for admission may have changed over time. We have previously reported on risk factors for hospitalisation [27–29] but here we explore in more detail hospital admissions with multimorbidity, a measure of both health service and individual burden.

## Methods

We used data from the European Prospective Investigation into Cancer in Norfolk cohort (EPIC-



1  
2 Norfolk) . [30,31] 25639 men and women aged 40–79 were recruited from general practices in  
3 Norfolk, completed a lifestyle questionnaire and attended a baseline health check from 1993 to 1997.  
4 Participants were reapproached approximately 12 years later, aged 48–92 with 9814 completing a  
5 second questionnaire and 8049 attending a health check at time-point two (TP2). Figure 1 shows a  
6 flow diagram of participant numbers at various stages. The cohort was followed-up until 2019 with  
7 annual record linkage to hospital episode data. Since linkage was to national databases and migration  
8 of cohort participants was rare, there was almost no loss to follow-up.  
9

10  
11  
12  
13  
14 The Charlson Comorbidity Index (CCI) is defined using a set of chronic diseases, each having an  
15 associated weight (1, 2, 3 or 6) related to the risk of death. The conditions are myocardial infarction,  
16 congestive heart failure, peripheral vascular disease, cerebrovascular disease, dementia, chronic  
17 pulmonary disease, rheumatoid disease, peptic ulcer disease, liver disease, diabetes, hemiplegia or  
18 paraplegia, renal disease, cancer and AIDS/HIV. Two levels of severity are defined for liver disease,  
19 diabetes and cancer (details are shown in supplementary table S4). All comorbidities are assigned a  
20 weight of 1 except hemiplegia/paraplegia, renal disease, and malignancies (weight=2);  
21 moderate/severe liver disease (weight=3); metastatic solid tumour and AIDS/HIV (weight=6). For  
22 diseases with two levels of severity (liver disease, diabetes and cancer), the less severe version is  
23 assigned weight=0 if the more severe version is also present in a patient. The CCI diseases were  
24 assigned diagnosis codes using the International Classification of Diseases (ICD-10) which was used to  
25 link the CCI to hospital episode statistics (HES) records and to cohort participants. The weighted  
26 individual disease scores were totalled to create an overall score with a maximum value of 29. [8,12]  
27 CCI was measured for various outcome periods restricted to all hospital events within the given time  
28 period: at baseline, 5-year (1999–2004) and 10-year (1999–2009) CCI and at TP2, 5-year (2009–  
29 2014) and 10-year (2009–2019) CCI. Multiple admissions including the same CCI category were only  
30 counted once.  
31  
32  
33  
34  
35  
36  
37  
38  
39  
40  
41

42 Participants attending the baseline and TP2 health examinations had their height to the nearest 0.1 cm  
43 measured using a stadiometer (Chasemores, UK) and their weight to the nearest 100g measured in  
44 light clothing without shoes (Salter, West Bromwich, UK). Body mass index (BMI) was calculated using  
45 measured weight in kilograms divided by the square of measured height in square metres. Trained  
46 nurses obtained non-fasting blood samples by venepuncture into plain and citrate bottles. Bloods were  
47 assayed at the Department of Clinical Biochemistry, University of Cambridge, UK. Serum  
48 concentrations of total cholesterol were measured with the RA 1000 Technicon analyser (Bayer  
49 Diagnostics, Basingstoke). Plasma was stabilised in a standardised volume of metaphosphoric acid  
50 stored at –70 °C and vitamin C concentrations measured using a fluorometric assay within one week.  
51 [32] Systolic blood pressure was measured using an Accutorr Sphygmomanometer (Datascope  
52 Medical, Huntington, United Kingdom). Participants sat for three minutes before two measurements  
53  
54  
55  
56  
57  
58  
59  
60

1  
2 were taken with the arm horizontal and held at mid-sternum level. Systolic blood pressure was  
3 defined as the average of the two measurements.  
4

5  
6 At baseline and again at TP2, participants completed a lifestyle questionnaire. Two yes/no questions  
7 were used to derive smoking status: "Have you ever smoked as much as one cigarette a day for as long  
8 as a year?" and, where a positive response was given, "Do you smoke cigarettes now?" Participants  
9 also completed questions about their employment and that of their partner with details of both  
10 current and past employment recorded. Occupational social class was defined according to the  
11 Registrar General's classification. [33,34] A list of common UK qualifications was used to establish  
12 educational attainment and participants were asked to mark all relevant qualifications. These were  
13 then categorised using the highest qualification attained. Participants were asked about their  
14 occupational and leisure physical activity. A combined score was created combining leisure and  
15 occupational elements and divided into four ordered categories with those who did not complete the  
16 question placed in the inactive category. The score was validated against energy expenditure  
17 measured by free-living heart rate monitoring with individual calibration. [35,36] Participants were  
18 asked "Are you a non-drinker/teetotaler now?" and "At present, about how many alcoholic drinks do  
19 you have each week" for various types of alcohol. Current units were calculated from the questionnaire  
20 responses with one unit equal to a half pint of beer, one glass of wine or fortified wine or a single  
21 measure of spirits. Prevalent disease was established from the question "Has the doctor ever told you  
22 that you have any of the following?" followed by a list of common conditions including "Heart attack  
23 (myocardial infarction)", "Stroke", "Cancer" and "Diabetes".  
24  
25  
26  
27  
28  
29  
30  
31  
32  
33  
34

### 35 36 **Statistical methods**

37  
38 Associations were examined both including and excluding chronic disease at baseline and repeated  
39 with independent measurements at TP2 in a subset of participants using a second baseline 12 years  
40 approximately after the first. The baseline analysis excludes 625 men and women who died before  
41 1999 while at TP2 a further 126 participants who died prior to 2009 were excluded. Dichotomous  
42 variables were created for the social class (manual and non-manual), educational attainment (high and  
43 low) at baseline and body mass index ( $>30$  and  $\leq 30$  kg/m<sup>2</sup>) and usual physical activity (active and  
44 inactive) at both baseline and TP2. For social class, professional, managerial and technical and non-  
45 manual skilled occupations were classed as non-manual while manual skilled, partly skilled and  
46 unskilled were classed as manual. For educational attainment, those with qualifications at secondary  
47 level or above were classed as high and those with no qualification as low. Hospital outcomes were  
48 categorised into five groups, "No hospital admissions", CCI=0, CCI=1, CCI=2 and CCI  $\geq 3$ . Multivariable  
49 logistic regression was used for all models comparing CCI  $\leq 2$  with CCI  $\geq 3$ . A sensitivity analysis, using  
50 identical models to those in table 4 for the period 1999–2009, but excluding 80 participants defined as  
51 multimorbid having only one condition with a CCI weighting  $\geq 3$ , gave virtually identical results to table  
52  
53  
54  
55  
56  
57  
58  
59  
60

4 (results not shown).

The numbers of individuals with missing values for covariables at baseline were: 53 BMI, 218 smoking status, 545 social class, 18 education level. The physical activity score has no missing values since those with missing data were classified as being inactive. Multiple imputation was used to estimate missing values at TP2 most apparent when participants completed questionnaires but did not attend a health examination n=1891. Predictive mean matching with 5 multiple imputations and 50 iterations was used with baseline and TP2 variables. All analyses were performed using the R statistical language (R Foundation for Statistical Computing, Vienna, Austria V3.5.3 with packages knitr, Gmisc, ggplot2, tidyverse, intubate, mice.) CCI were calculated using the R package “comorbidity”. [37]

## Results

Table 1 shows future 5-year and 10-year multimorbidity hospital admission rates from baseline for n=25014 and from time-point two (TP2) for n=9814 according to demographic characteristics in the study population. Between 1999–2009 18179 participants (73% of the population) had a hospital admission. Baseline 5-year and 10-year incident multimorbidity were observed in 13% and 21% of participants respectively. Figure 2 shows 10-year multimorbidity rates (CCI  $\geq 2$ ) by age group and sex. More men had CCI  $\geq 3$  than women and those aged >75 years had the highest proportion of admissions with multimorbid conditions with 30.6% at 5 years and 36.4% at 10 years. Multimorbidity rates at TP2 were similar to baseline with 5-year and 10-year incident CCI  $\geq 3$  observed in 20% and 28% of participants respectively and similar rates in those >75 years.

**Table 1 | Charlson Comorbidity Index hospitalisation rates by age-group and sex in men and women aged 40–79, 1999–2019**

|                                                                | Total | No admissions | Charlson 0  | Charlson 1  | Charlson 2 | Charlson $\geq 3$ |
|----------------------------------------------------------------|-------|---------------|-------------|-------------|------------|-------------------|
| <b>Baseline 5-year multimorbidity, 1999–2004 (n(%))</b>        |       |               |             |             |            |                   |
| Men                                                            | 11228 | 5457 (48.6)   | 3340 (29.7) | 988 (8.8)   | 662 (5.9)  | 781 (7.0)         |
| Women                                                          | 13786 | 7153 (51.9)   | 4398 (31.9) | 953 (6.9)   | 643 (4.7)  | 639 (4.6)         |
| $\leq 55$ years                                                | 9567  | 6009 (62.8)   | 2720 (28.4) | 411 (4.3)   | 236 (2.5)  | 191 (2.0)         |
| (55–65] years                                                  | 7805  | 3940 (50.5)   | 2479 (31.8) | 583 (7.5)   | 408 (5.2)  | 395 (5.1)         |
| (65–75] years                                                  | 6933  | 2489 (35.9)   | 2322 (33.5) | 830 (12.0)  | 561 (8.1)  | 731 (10.5)        |
| >75 years                                                      | 709   | 172 (24.3)    | 217 (30.6)  | 117 (16.5)  | 100 (14.1) | 103 (14.5)        |
| <b>Baseline 10-year multimorbidity, 1999–2009 (n(%))</b>       |       |               |             |             |            |                   |
| Men                                                            | 11228 | 2928 (26.1)   | 4151 (37.0) | 1434 (12.8) | 1056 (9.4) | 1659 (14.8)       |
| Women                                                          | 13786 | 3907 (28.3)   | 5767 (41.8) | 1601 (11.6) | 1137 (8.2) | 1374 (10.0)       |
| $\leq 55$ years                                                | 9567  | 3720 (38.9)   | 4201 (43.9) | 746 (7.8)   | 476 (5.0)  | 424 (4.4)         |
| (55–65] years                                                  | 7805  | 1973 (25.3)   | 3259 (41.8) | 994 (12.7)  | 711 (9.1)  | 868 (11.1)        |
| (65–75] years                                                  | 6933  | 1059 (15.3)   | 2294 (33.1) | 1168 (16.8) | 875 (12.6) | 1537 (22.2)       |
| >75 years                                                      | 709   | 83 (11.7)     | 164 (23.1)  | 127 (17.9)  | 131 (18.5) | 204 (28.8)        |
| <b>Time-point two 5-year multimorbidity, 2009–2014 (n(%))</b>  |       |               |             |             |            |                   |
| Men                                                            | 4252  | 1428 (33.6)   | 1355 (31.9) | 522 (12.3)  | 389 (9.1)  | 558 (13.1)        |
| Women                                                          | 5562  | 2234 (40.2)   | 1793 (32.2) | 686 (12.3)  | 403 (7.2)  | 446 (8.0)         |
| $\leq 55$ years                                                | 342   | 215 (62.9)    | 92 (26.9)   | 19 (5.6)    | 10 (2.9)   | 6 (1.8)           |
| (55–65] years                                                  | 3090  | 1540 (49.8)   | 1006 (32.6) | 277 (9.0)   | 143 (4.6)  | 124 (4.0)         |
| (65–75] years                                                  | 3695  | 1303 (35.3)   | 1301 (35.2) | 464 (12.6)  | 286 (7.7)  | 341 (9.2)         |
| >75 years                                                      | 2687  | 604 (22.5)    | 749 (27.9)  | 448 (16.7)  | 353 (13.1) | 533 (19.8)        |
| <b>Time-point two 10-year multimorbidity, 2009–2019 (n(%))</b> |       |               |             |             |            |                   |

|               | Total | No admissions | Charlson 0  | Charlson 1 | Charlson 2 | Charlson ≥3 |
|---------------|-------|---------------|-------------|------------|------------|-------------|
| Men           | 4252  | 695 (16.3)    | 1294 (30.4) | 631 (14.8) | 558 (13.1) | 1074 (25.3) |
| Women         | 5562  | 1166 (21.0)   | 1956 (35.2) | 914 (16.4) | 618 (11.1) | 908 (16.3)  |
| ≤55 years     | 342   | 154 (45.0)    | 122 (35.7)  | 37 (10.8)  | 14 (4.1)   | 15 (4.4)    |
| (55–65] years | 3090  | 905 (29.3)    | 1241 (40.2) | 407 (13.2) | 267 (8.6)  | 270 (8.7)   |
| (65–75] years | 3695  | 589 (15.9)    | 1309 (35.4) | 611 (16.5) | 473 (12.8) | 713 (19.3)  |
| >75 years     | 2687  | 213 (7.9)     | 578 (21.5)  | 490 (18.2) | 422 (15.7) | 984 (36.6)  |

Descriptive characteristics of the cohort according to 10-year CCI are shown in table 2. Participants with higher number of admissions and longer duration of hospital stay had higher CCI, with mean duration 58 days and 13 admissions for participants with CCI ≥3 during the 10-year period. Participants with multimorbidity admissions were more likely at baseline examination to be current smokers, less physically active, have higher body mass index (BMI) and have lower plasma vitamin C (a proxy for a diet rich in fruit and vegetables) and report various prevalent conditions.

**Table 2 | Descriptive characteristics at baseline in 25014 men and women aged 40–79 by 10-year Charlson Comorbidity Index, 1999–2009**

|                                               | Total       | No admissions | Charlson 0  | Charlson 1  | Charlson 2  | Charlson ≥3 |
|-----------------------------------------------|-------------|---------------|-------------|-------------|-------------|-------------|
| <b>Hospital duration 1999–2009, days</b>      |             |               |             |             |             |             |
| Mean ±SD                                      | 16.3 ±46.5  | 0.0 ±0.0      | 9.1 ±28.3   | 24.9 ±71.5  | 30.4 ±43.0  | 57.8 ±77.5  |
| <b>Total hospital admissions 1999–2009</b>    |             |               |             |             |             |             |
| Mean ±SD                                      | 3.8 ±16.2   | 0.0 ±0.0      | 2.8 ±3.1    | 4.5 ±6.0    | 6.4 ±8.3    | 13.4 ±43.9  |
| <b>Age, years</b>                             |             |               |             |             |             |             |
| Mean ±SD                                      | 59.0 ±9.3   | 55.4 ±8.6     | 57.9 ±8.8   | 62.0 ±8.8   | 62.9 ±8.8   | 65.0 ±8.0   |
| <b>Body mass index, kg/m<sup>2</sup></b>      |             |               |             |             |             |             |
| Mean ±SD                                      | 26.4 ±3.9   | 25.9 ±3.7     | 26.2 ±3.8   | 26.8 ±4.1   | 26.8 ±4.3   | 27.3 ±4.2   |
| <b>Cigarette smoking (n (%))</b>              |             |               |             |             |             |             |
| Current                                       | 2904        | 751 (25.9)    | 1008 (34.7) | 410 (14.1)  | 291 (10.0)  | 444 (15.3)  |
| Former                                        | 10423       | 2558 (24.5)   | 4007 (38.4) | 1352 (13.0) | 979 (9.4)   | 1527 (14.7) |
| Never                                         | 11469       | 3476 (30.3)   | 4821 (42.0) | 1245 (10.9) | 903 (7.9)   | 1024 (8.9)  |
| <b>Social class dichotomised (n (%))</b>      |             |               |             |             |             |             |
| Non-manual                                    | 14717       | 4400 (29.9)   | 5707 (38.8) | 1733 (11.8) | 1256 (8.5)  | 1621 (11.0) |
| Manual                                        | 9752        | 2304 (23.6)   | 4029 (41.3) | 1214 (12.4) | 886 (9.1)   | 1319 (13.5) |
| <b>Level of education (n (%))</b>             |             |               |             |             |             |             |
| Higher level                                  | 15866       | 4922 (31.0)   | 6333 (39.9) | 1724 (10.9) | 1277 (8.0)  | 1610 (10.1) |
| Lower level                                   | 9130        | 1910 (20.9)   | 3576 (39.2) | 1310 (14.3) | 916 (10.0)  | 1418 (15.5) |
| <b>Simple physical activity index (n (%))</b> |             |               |             |             |             |             |
| Inactive                                      | 7559        | 1681 (22.2)   | 2666 (35.3) | 1116 (14.8) | 788 (10.4)  | 1308 (17.3) |
| Moderately inactive                           | 7187        | 2084 (29.0)   | 2904 (40.4) | 819 (11.4)  | 610 (8.5)   | 770 (10.7)  |
| Moderately active                             | 5688        | 1708 (30.0)   | 2353 (41.4) | 608 (10.7)  | 470 (8.3)   | 549 (9.7)   |
| Active                                        | 4580        | 1362 (29.7)   | 1995 (43.6) | 492 (10.7)  | 325 (7.1)   | 406 (8.9)   |
| <b>Alcohol intake, units per week</b>         |             |               |             |             |             |             |
| Mean ±SD                                      | 7.1 ±9.5    | 7.7 ±9.6      | 6.9 ±9.1    | 6.9 ±9.5    | 6.7 ±9.8    | 6.8 ±10.3   |
| <b>Plasma vitamin C, µmol/L</b>               |             |               |             |             |             |             |
| Mean ±SD                                      | 53.5 ±20.3  | 55.3 ±19.8    | 55.4 ±19.9  | 50.5 ±20.3  | 51.3 ±20.9  | 47.6 ±20.6  |
| <b>Systolic blood pressure, mmHg</b>          |             |               |             |             |             |             |
| Mean ±SD                                      | 135.3 ±18.3 | 132.4 ±17.4   | 133.5 ±17.5 | 138.7 ±18.7 | 138.6 ±19.2 | 142.2 ±19.3 |
| <b>Total cholesterol, mmol/L</b>              |             |               |             |             |             |             |
| Mean ±SD                                      | 6.2 ±1.2    | 6.1 ±1.1      | 6.1 ±1.1    | 6.3 ±1.2    | 6.2 ±1.2    | 6.3 ±1.2    |
| <b>Prevalent heart attack (n (%))</b>         |             |               |             |             |             |             |
| No reported heart attack                      | 24253       | 6745 (27.8)   | 9764 (40.3) | 2886 (11.9) | 2097 (8.6)  | 2761 (11.4) |
| Self-reported heart attack                    | 728         | 85 (11.7)     | 143 (19.6)  | 146 (20.1)  | 94 (12.9)   | 260 (35.7)  |
| <b>Prevalent stroke (n (%))</b>               |             |               |             |             |             |             |
| No reported stroke                            | 24660       | 6786 (27.5)   | 9821 (39.8) | 2975 (12.1) | 2151 (8.7)  | 2927 (11.9) |
| Self-reported stroke                          | 329         | 45 (13.7)     | 87 (26.4)   | 57 (17.3)   | 41 (12.5)   | 99 (30.1)   |
| <b>Prevalent cancer (n (%))</b>               |             |               |             |             |             |             |
| No reported cancer                            | 23688       | 6595 (27.8)   | 9449 (39.9) | 2878 (12.1) | 2031 (8.6)  | 2735 (11.5) |

|                                   | Total | No admissions | Charlson 0  | Charlson 1  | Charlson 2 | Charlson ≥3 |
|-----------------------------------|-------|---------------|-------------|-------------|------------|-------------|
| Self-reported cancer              | 1301  | 237 (18.2)    | 459 (35.3)  | 155 (11.9)  | 162 (12.5) | 288 (22.1)  |
| <b>Prevalent diabetes (n (%))</b> |       |               |             |             |            |             |
| No reported diabetes              | 24442 | 6760 (27.7)   | 9844 (40.3) | 2941 (12.0) | 2111 (8.6) | 2786 (11.4) |
| Self-reported diabetes            | 541   | 71 (13.1)     | 61 (11.3)   | 90 (16.6)   | 81 (15.0)  | 238 (44.0)  |

In table 3, odds ratios are shown for 5-year and 10-year incident multimorbidity, defined as those with CCI  $\geq 3$ , compared with CCI  $\leq 1$  or no hospital admission, adjusted age, sex, occupational social class and educational attainment in model 1. Model 2 additionally adjusts for prevalent diseases, cardiovascular disease (CVD), cancer and diabetes; model 3 adds lifestyle factors, current smoking, alcohol units per week, usual physical activity as well as BMI  $>30$  kg/m<sup>2</sup> and plasma vitamin C; model 4 adds systolic blood pressure and cholesterol. Age, sex and prevalent diseases were strongly associated with multimorbidity admissions in all models. The fully adjusted association of 10-year incident multimorbidity with age per 10 years increase was OR 2.19 (95% CI 2.06–2.33), for sex OR 1.32 (95% CI 1.19–1.47), for prevalent CVD OR 2.22 (95% CI 1.87–2.62), cancer OR 2.05 (95% CI 1.73–2.42) and diabetes OR 3.41 (95% CI 2.74–4.24). The risk of multimorbidity in participants with CVD at baseline is equivalent to the risk in those without CVD 10 years older. Similarly, in participants with baseline diabetes and baseline cancer, the risk equivalent to those without disease is 17 and 11 years older respectively.

**Table 3 | Multivariable logistic regression of risk factors for Charlson 5-year and 10-year hospital admissions with multimorbidity in 25014 men and women**

|                                | Charlson 5-year multimorbidity †, 1999–2004<br>OR (95% CI) | p value | Charlson 10-year multimorbidity †, 1999–2009<br>OR (95% CI) | p value |
|--------------------------------|------------------------------------------------------------|---------|-------------------------------------------------------------|---------|
| <b>Model 1</b>                 |                                                            |         |                                                             |         |
| Male sex                       | 1.49 (1.34–1.67)                                           | < 0.001 | 1.56 (1.44–1.69)                                            | < 0.001 |
| Age per 10 years               | 2.27 (2.13–2.44)                                           | < 0.001 | 2.34 (2.23–2.46)                                            | < 0.001 |
| Manual social class            | 1.20 (1.07–1.35)                                           | 0.002   | 1.22 (1.12–1.33)                                            | < 0.001 |
| Lower education level          | 1.15 (1.02–1.30)                                           | 0.023   | 1.19 (1.09–1.30)                                            | < 0.001 |
| <b>Model 2</b>                 |                                                            |         |                                                             |         |
| Male sex                       | 1.39 (1.24–1.56)                                           | < 0.001 | 1.47 (1.35–1.60)                                            | < 0.001 |
| Age per 10 years               | 2.11 (1.97–2.26)                                           | < 0.001 | 2.21 (2.10–2.32)                                            | < 0.001 |
| Manual social class            | 1.22 (1.08–1.37)                                           | 0.001   | 1.23 (1.13–1.34)                                            | < 0.001 |
| Lower education level          | 1.13 (1.00–1.28)                                           | 0.053   | 1.17 (1.07–1.28)                                            | < 0.001 |
| Prevalent CVD                  | 2.23 (1.85–2.68)                                           | < 0.001 | 2.25 (1.93–2.60)                                            | < 0.001 |
| Prevalent cancer               | 2.11 (1.75–2.54)                                           | < 0.001 | 1.92 (1.65–2.22)                                            | < 0.001 |
| Prevalent diabetes             | 4.41 (3.55–5.45)                                           | < 0.001 | 4.32 (3.57–5.21)                                            | < 0.001 |
| <b>Model 3</b>                 |                                                            |         |                                                             |         |
| Male sex                       | 1.24 (1.07–1.42)                                           | 0.003   | 1.33 (1.20–1.47)                                            | < 0.001 |
| Age per 10 years               | 2.16 (1.99–2.34)                                           | < 0.001 | 2.29 (2.16–2.43)                                            | < 0.001 |
| Manual social class            | 1.09 (0.95–1.25)                                           | 0.214   | 1.17 (1.06–1.29)                                            | 0.002   |
| Lower education level          | 1.06 (0.92–1.21)                                           | 0.447   | 1.08 (0.98–1.20)                                            | 0.112   |
| Current smoker                 | 1.71 (1.42–2.05)                                           | < 0.001 | 1.73 (1.51–1.98)                                            | < 0.001 |
| BMI $>30$ kg/m <sup>2</sup>    | 1.32 (1.12–1.56)                                           | < 0.001 | 1.45 (1.28–1.63)                                            | < 0.001 |
| Alcohol intake, units per week | 1.00 (0.99–1.01)                                           | 0.872   | 1.00 (1.00–1.01)                                            | 0.666   |
| Physically inactive            | 1.26 (1.10–1.44)                                           | < 0.001 | 1.15 (1.04–1.26)                                            | 0.006   |
| Plasma vitamin C per SD        | 0.81 (0.75–0.86)                                           | < 0.001 | 0.84 (0.80–0.88)                                            | < 0.001 |
| Prevalent CVD                  | 2.02 (1.63–2.49)                                           | < 0.001 | 2.17 (1.84–2.57)                                            | < 0.001 |
| Prevalent cancer               | 2.22 (1.79–2.72)                                           | < 0.001 | 2.06 (1.74–2.43)                                            | < 0.001 |
| Prevalent diabetes             | 3.53 (2.73–4.52)                                           | < 0.001 | 3.54 (2.85–4.39)                                            | < 0.001 |
| <b>Model 4</b>                 |                                                            |         |                                                             |         |

|                                | Charlson 5-year multimorbidity †, 1999–2004<br>OR (95% CI) | p value | Charlson 10-year multimorbidity †, 1999–2009<br>OR (95% CI) | p value |
|--------------------------------|------------------------------------------------------------|---------|-------------------------------------------------------------|---------|
| Male sex                       | 1.23 (1.07–1.43)                                           | 0.005   | 1.32 (1.19–1.47)                                            | < 0.001 |
| Age per 10 years               | 2.08 (1.91–2.27)                                           | < 0.001 | 2.19 (2.06–2.33)                                            | < 0.001 |
| Manual social class            | 1.09 (0.95–1.25)                                           | 0.235   | 1.16 (1.05–1.28)                                            | 0.004   |
| Lower education level          | 1.06 (0.92–1.22)                                           | 0.420   | 1.09 (0.99–1.21)                                            | 0.091   |
| Current smoker                 | 1.72 (1.43–2.07)                                           | < 0.001 | 1.74 (1.52–2.00)                                            | < 0.001 |
| BMI>30 kg/m <sup>2</sup>       | 1.31 (1.11–1.54)                                           | 0.001   | 1.40 (1.24–1.58)                                            | < 0.001 |
| Alcohol intake, units per week | 1.00 (0.99–1.01)                                           | 0.878   | 1.00 (1.00–1.01)                                            | 0.800   |
| Physically inactive            | 1.25 (1.09–1.43)                                           | 0.001   | 1.14 (1.04–1.26)                                            | 0.008   |
| Plasma vitamin C per SD        | 0.81 (0.76–0.87)                                           | < 0.001 | 0.85 (0.81–0.89)                                            | < 0.001 |
| Systolic blood pressure per SD | 1.10 (1.03–1.17)                                           | 0.005   | 1.12 (1.07–1.18)                                            | < 0.001 |
| Total cholesterol per SD       | 0.99 (0.92–1.05)                                           | 0.690   | 0.99 (0.94–1.04)                                            | 0.614   |
| Prevalent CVD                  | 2.06 (1.66–2.54)                                           | < 0.001 | 2.22 (1.87–2.62)                                            | < 0.001 |
| Prevalent cancer               | 2.23 (1.80–2.75)                                           | < 0.001 | 2.05 (1.73–2.42)                                            | < 0.001 |
| Prevalent diabetes             | 3.42 (2.64–4.39)                                           | < 0.001 | 3.41 (2.74–4.24)                                            | < 0.001 |

† Charlson Comorbidity Index  $\geq 3$  vs Charlson  $\leq 2$  or no hospital admission.

The models in table 4 are similar to those used in table 3 but rather than adjusting for prevalent disease, participants who reported heart attack, stroke, cancer or diabetes at baseline were excluded. In this subgroup of participants without known common major diseases, in addition to age and sex, current cigarette smoking OR 1.74 (95% CI 1.52–2.00), BMI >30 kg/m<sup>2</sup> OR 1.40 (95% CI 1.24–1.58) and physical inactivity OR 1.14 (95% CI 1.04–1.26) were positively associated and plasma vitamin C OR 0.85 (95% CI 0.81–0.89) inversely associated with incident 10-year hospital admissions with multimorbidity after multivariable adjustment for age, sex, social class, education, alcohol consumption, systolic blood pressure and cholesterol (model 3). Manual social class and educational attainment were associated with incident multimorbidity in model 1 but were attenuated in model 2 and 3. An inverse association was observed for total cholesterol while systolic blood pressure appeared to be associated but the direction of association was not consistent with the repeated analyses from TP2. There was no association for alcohol in these models. The risk of multimorbidity in current cigarette smokers is equivalent to the risk in non-smokers 7 years older, while each 20  $\mu\text{mol/L}$  rise in plasma vitamin C (approximately two servings of fruit and vegetables per day [38]) corresponds to a reduction in risk equivalent risk of those 3 years younger.

**Table 4 | Multivariable logistic regression of risk factors excluding participants with prevalent CVD, cancer or diabetes for Charlson 5-year and 10-year hospital admissions with multimorbidity in 22278 men and women**

|                       | Charlson 5-year multimorbidity †, 1999–2004<br>OR (95% CI) | p value | Charlson 10-year multimorbidity †, 1999–2009<br>OR (95% CI) | p value |
|-----------------------|------------------------------------------------------------|---------|-------------------------------------------------------------|---------|
| <b>Model 1</b>        |                                                            |         |                                                             |         |
| Male sex              | 1.47 (1.29–1.68)                                           | < 0.001 | 1.52 (1.38–1.67)                                            | < 0.001 |
| Age per 10 years      | 2.19 (2.02–2.37)                                           | < 0.001 | 2.31 (2.19–2.45)                                            | < 0.001 |
| Manual social class   | 1.23 (1.07–1.42)                                           | 0.003   | 1.22 (1.11–1.34)                                            | < 0.001 |
| Lower education level | 1.20 (1.04–1.39)                                           | 0.011   | 1.16 (1.05–1.28)                                            | 0.003   |
| <b>Model 2</b>        |                                                            |         |                                                             |         |
| Male sex              | 1.32 (1.13–1.55)                                           | < 0.001 | 1.39 (1.24–1.55)                                            | < 0.001 |
| Age per 10 years      | 2.24 (2.05–2.46)                                           | < 0.001 | 2.40 (2.25–2.56)                                            | < 0.001 |
| Manual social class   | 1.13 (0.96–1.32)                                           | 0.131   | 1.17 (1.05–1.30)                                            | 0.006   |



1  
2  
3  
4  
5  
6  
7  
8  
9  
10  
11  
12  
13  
14  
15  
16  
17  
18  
19  
20  
21  
22  
23  
24  
25  
26  
27  
28  
29  
30  
31  
32  
33  
34  
35  
36  
37  
38  
39  
40  
41  
42  
43  
44  
45  
46  
47  
48  
49  
50  
51  
52  
53  
54  
55  
56  
57  
58  
59  
60

|                                | Charlson 5-year multimorbidity †, 1999–2004<br>OR (95% CI) | p value | Charlson 10-year multimorbidity †, 1999–2009<br>OR (95% CI) | p value |
|--------------------------------|------------------------------------------------------------|---------|-------------------------------------------------------------|---------|
| Lower education level          | 1.07 (0.91–1.25)                                           | 0.416   | 1.05 (0.93–1.17)                                            | 0.428   |
| Current smoker                 | 1.85 (1.50–2.26)                                           | < 0.001 | 1.84 (1.58–2.13)                                            | < 0.001 |
| BMI>30 kg/m <sup>2</sup>       | 1.31 (1.07–1.58)                                           | 0.006   | 1.53 (1.34–1.75)                                            | < 0.001 |
| Alcohol intake, units per week | 1.00 (0.99–1.01)                                           | 0.789   | 1.00 (1.00–1.01)                                            | 0.805   |
| Physically inactive            | 1.25 (1.07–1.46)                                           | 0.004   | 1.17 (1.05–1.31)                                            | 0.005   |
| Plasma vitamin C per SD        | 0.82 (0.76–0.89)                                           | < 0.001 | 0.85 (0.80–0.90)                                            | < 0.001 |
| <b>Model 3</b>                 |                                                            |         |                                                             |         |
| Male sex                       | 1.32 (1.12–1.56)                                           | 0.001   | 1.37 (1.22–1.54)                                            | < 0.001 |
| Age per 10 years               | 2.15 (1.95–2.37)                                           | < 0.001 | 2.30 (2.15–2.46)                                            | < 0.001 |
| Manual social class            | 1.11 (0.95–1.31)                                           | 0.178   | 1.15 (1.03–1.29)                                            | 0.012   |
| Lower education level          | 1.07 (0.91–1.26)                                           | 0.383   | 1.05 (0.94–1.18)                                            | 0.393   |
| Current smoker                 | 1.88 (1.52–2.30)                                           | < 0.001 | 1.86 (1.60–2.15)                                            | < 0.001 |
| BMI>30 kg/m <sup>2</sup>       | 1.30 (1.07–1.58)                                           | 0.007   | 1.48 (1.30–1.70)                                            | < 0.001 |
| Alcohol intake, units per week | 1.00 (0.99–1.01)                                           | 0.828   | 1.00 (0.99–1.01)                                            | 0.941   |
| Physically inactive            | 1.24 (1.06–1.45)                                           | 0.007   | 1.16 (1.04–1.29)                                            | 0.009   |
| Plasma vitamin C per SD        | 0.83 (0.77–0.90)                                           | < 0.001 | 0.86 (0.81–0.91)                                            | < 0.001 |
| Systolic blood pressure per SD | 1.12 (1.03–1.21)                                           | 0.005   | 1.13 (1.07–1.19)                                            | < 0.001 |
| Total cholesterol per SD       | 0.98 (0.91–1.06)                                           | 0.607   | 0.97 (0.92–1.03)                                            | 0.328   |

† Charlson Comorbidity Index  $\geq 3$  vs Charlson  $\leq 2$  or no hospital admission.

Supplementary table S1 shows the descriptive characteristics of participants at TP2 for 10-year CCI. Mean age in this subset, measured approximately 12 years after baseline, was 69.4. Hospital admissions and length of stay was similar to the baseline with multimorbid participants (CCI  $\geq 3$ ) having much longer duration than those with non-multimorbid participants or those who had no hospital admissions. Multimorbid participants were inactive, had lower plasma vitamin C (reflecting a lower intake of fruit and vegetables), were current or former smokers and had prevalent disease. In supplementary table S2, multivariable models of 10-year incident multimorbidity show that prevalent diabetes, CVD and cancer are all strongly associated. After excluding prevalent disease, supplementary table S3 shows multivariate associations in a group free from the most serious diseases at TP2. Both age and male sex are associated with subsequent multimorbidity, with educational attainment, current cigarette smoking, plasma vitamin C, BMI>30 kg/m<sup>2</sup> and physical inactivity all predicting future multimorbidity. Systolic blood pressure was attenuated while other factors including cholesterol were more strongly associated than at baseline. Supplementary table S4 shows the ICD-10 codes corresponding to Charlson Comorbidity Index disease groups.

## Discussion

In this community-based population followed prospectively, we observed incident hospital multimorbidity admissions rates over 5-year and 10-years periods which, as expected were strongly related to increasing age. We also observed that those with multimorbid hospital admissions had substantially more days in hospital over the outcome periods. In multivariable analyses, risk of such admissions is predicted by age, male sex and several potentially modifiable factors. Participants at baseline who smoked cigarettes, had BMI >30, were physically inactive or had a diet low in fruit and

1  
2 vegetables all had higher likelihood of having subsequent hospital admissions with multimorbidity.  
3  
4 Measurements made on a subset of the cohort 12 years after baseline who were followed up  
5  
6 subsequently confirmed the baseline findings while also demonstrating an association for low  
7  
8 education level in an older cohort with incident multimorbidity.

### 9 **Strengths and limitations of study**

10  
11 Most studies of multimorbidity focus on its consequences and those examining risk factors for  
12  
13 multimorbidity are largely cross-sectional. While many prospective studies have examined the  
14  
15 relationship between baseline characteristics and specific incident diseases or mortality, establishing  
16  
17 multimorbidity as an endpoint is more challenging. By using the Charlson Comorbidity Index to define  
18  
19 multimorbidity, we were able to show that the chronic diseases defined by the index had considerably  
20  
21 higher average length of stay than other conditions requiring hospitalisation and that length of stay  
22  
23 increased with higher CCI score. The current population-based study in a defined community was able  
24  
25 to assess incident hospital admissions with multimorbidity to enable estimates of 5-year and 10-year  
26  
27 rates by age and sex. We were also able to document the relationship between demographic, lifestyle  
28  
29 and physiological factors and subsequent hospitalisations for multimorbidity. The EPIC-Norfolk cohort  
30  
31 has been followed for 20 years enabling us to examine the determinants of multimorbidity at two  
32  
33 time-points: in mainly middle-aged participants of 40–79 years and mainly old-aged participants of  
34  
35 48–92 years in a sub-cohort 12 years later after major organisational changes had been made to the  
36  
37 National Health Service (NHS). We were also able to examine associations with and without excluding  
38  
39 participants with known prevalent conditions at baseline.

40  
41 While not attempting to examine clusters or pathways of chronic disease, we have identified risk  
42  
43 factors that predict any hospital admissions with multimorbidity. It is possible that some factors we  
44  
45 observed will be more strongly associated with certain combinations of diseases and others less so.  
46  
47 However, the burden of resources experienced by hospitals can best be mitigated by early public  
48  
49 health advice, prior to the onset of disease if possible, which can only be general in nature. Our  
50  
51 findings are in line with current public health advice such as smoking cessation, a diet containing fruit  
52  
53 and vegetables and regular exercise and, given the huge additional burden placed on the NHS by  
54  
55 multimorbidity, should further emphasise the need for public health advice and intervention.

56  
57 Multimorbidity can be defined in a number of ways such as disease counts or using various indexes.  
58  
59 [39] By restricting the definition to a relatively small subset of chronic conditions such as in the CCI,  
60  
inevitably some conditions will not be counted. It is notable that the CCI does not include depression  
or mental health, asthma or respiratory diseases, epilepsy, hypothyroidism, musculoskeletal problems  
or atrial fibrillation, all common in a primary care setting. [40] In addition to the CCI and other  
commonly used systems [41], authors have used many other definitions with variable numbers of



1  
2 underlying conditions and hence the prevalence of multimorbidity varies widely. However, CCI is a  
3 widely used measure of multimorbidity.  
4

5  
6 Since the CCI is weighted to predict mortality, it may be better able to assess health service burden  
7 than a simple disease count, since procedures required for higher weighted conditions will generally  
8 be more costly. However, it may be less effective as an indicator of multiple long-term conditions.  
9  
10 Some chronic conditions such as musculoskeletal and mental health diseases not included in the CCI  
11 are nevertheless likely to require long stay inpatient care. However, increasing CCI had longer hospital  
12 length of stay in the present study and this has also been reported in several other studies. [42,43]  
13  
14 Medical conditions such as obesity have well established links to many diseases but, as non-diseases,  
15 are not included in the CCI. The use of CCI  $\geq 3$  to define multimorbidity classifies a small number of  
16 participants with one serious disease with a high CCI weight as multimorbid. However, a sensitivity  
17 excluding these people gave virtually identical results. Studies examining the longitudinal predictors of  
18 future multimorbidity generally rely on self-reported disease but our study used the CCI from linked  
19 hospital medical coding.  
20  
21  
22  
23  
24  
25

26 When examining the relationship between lifestyle factors and health outcomes, confounding will  
27 always be a limitation. Individuals who smoke, are less physically active and eat a poor diet for  
28 example, are likely to differ from those with a contrasting lifestyle with respect to other factors  
29 relating to the likelihood of future multimorbidity including their age, sex, lifestyle factors examined in  
30 this study and others unknown. However, the associations we report were consistent after  
31 multivariable adjustment for other factors. Differential mortality is another possible limitation and  
32 would occur for any of the factors examined if participants with an apparently unhealthy characteristic  
33 were more likely to have died earlier than those with the contrary healthy characteristic and hence  
34 were less likely to use hospital services for the full follow-up period. However, the results for the 5-  
35 year follow-up period where very few deaths occurred were consistent with the longer 10-year follow-  
36 up period. While it is possible that some participants were multimorbid at baseline, we examined  
37 those with and without baseline self-reported major chronic disease.  
38  
39  
40  
41  
42  
43  
44  
45

#### 46 **Comparison with other studies**

47  
48 Estimates of the prevalence of multimorbidity vary widely, partly due to the variety of definitions,  
49 number of diseases, weighting etc. used in studies but range from 55 to 98% in the elderly .[6] Most  
50 studies report multimorbidity associated with age and present in more than half of those aged 65 and  
51 older. [3,44] Age was strongly associated with future hospitalisation and incident multimorbidity in  
52 our study and has been reported to increase hospitalised multimorbidity in elderly patients. [45] Many  
53 studies have found that women have a higher rate of multimorbidity than men [6,44,46–48], but we  
54 observed the converse with male sex strongly predicting future multimorbidity. The use of CCI in the  
55  
56  
57  
58  
59  
60

1  
2 context of prospective hospital admissions rather than cross-sectional multimorbidity in a primary  
3 care setting may explain the higher proportion of multimorbid men. Physical-mental comorbidity is  
4 reported higher among women in primary care [49] and mental health, which is not included in the  
5 CCI, may be more likely to be treated in a primary care than in an acute hospital setting.  
6  
7

8  
9 Despite the considerable literature relating to multimorbidity, very few studies have examined the  
10 modifiable determinants of incident multimorbidity. Incident Cancer and cardiometabolic  
11 multimorbidity was examined in a recent multi-centre study which included data from the present  
12 study [21]; pre-diagnostic healthy lifestyle behaviours were reported to be inversely associated with  
13 the risk. BMI was also reported to be associated with incident cardiometabolic multimorbidity in a  
14 pooled analysis of 16 cohort studies. [22] A Finnish study examined incident multimorbidity in both  
15 disease-free and those with baseline diabetes and CVD. [24] They reported some similar findings to  
16 the present study such as associations with cigarette smoking, physical inactivity and BMI but  
17 associations for low education level and systolic blood pressure were only found in men.  
18  
19 Multimorbidity was defined as the five common diseases and time to event 10-year follow-up was  
20 used rather than a follow-up period approach in this study. Participants in the Finnish cohort were  
21 younger than those in EPIC-Norfolk with the oldest participant 74 years at the end of follow-up against  
22 90 years in EPIC-Norfolk baseline and 100 years at TP2. Studies using data from an English  
23 longitudinal cohort and using self-reported disease counts to define multimorbidity reported  
24 associations in physical activity, obesity and low level of wealth and an increased risk of  
25 multimorbidity when combined with other lifestyle factors such smoking, obesity and inadequate fruit  
26 and vegetable consumption. [25,26] However, they found no association with educational attainment  
27 or excess alcohol consumption. Education, which was associated in older participants at TP2 in our  
28 study, has been linked to multimorbidity in cross-sectional studies [50] and prospectively. [24]  
29  
30 Socioeconomic status was reported to predict the development of multimorbidity throughout the life  
31 course in a Scottish longitudinal study. [51] Both educational attainment and occupational social class  
32 were attenuated in our study possibly due to the models including plasma vitamin C, also a marker of  
33 socioeconomic status. While smoking was a strong predictor, we did not find an association with  
34 alcohol drinking. However, other studies in the literature are inconsistent, with some finding no  
35 association with cigarette smoking and alcohol consumption in cross-sectional analyses [1]  
36  
37  
38  
39  
40  
41  
42  
43  
44  
45  
46  
47  
48  
49

### 50 **Generalisability**

51  
52 While hospital admissions with multimorbidity provide an objective indicator of both Health Service  
53 and individual burden of the condition, studies of hospital admissions in many countries are limited by  
54 factors relating to differential accessibility to health care such as health insurance, income and health  
55 care policy. Though not entirely free of differential accessibility, the NHS in the UK, with service free at  
56 the point of delivery for all residents, provides an opportunity to examine hospitalised multimorbidity  
57  
58  
59  
60

1  
2 with fewer of these constraints. Health care policy and criteria for admission change over time, not  
3 least in the UK over the 20-year period of this study, so we examined admissions and risk factors for  
4 multimorbidity over two independent time periods using new repeated measures and found  
5 consistent results.  
6  
7

## 8 9 **Conclusions and policy implications**

10  
11 We observed in a long-term population-based study that age, male sex and potentially modifiable  
12 factors including smoking, body mass index, physical inactivity and a diet low in fruit and vegetables  
13 predict future incident hospitalised multimorbidity. Multimorbidity is increasingly common among  
14 elderly hospital inpatients due in part to improved efficacy of treatments and drugs. While  
15 considerable effort is being focused on the progression, disease clustering and treatment of patients  
16 with multimorbidity, there has been less attention on the long-term predictors of future incident  
17 multimorbidity. This study suggests that modest difference in lifestyles may have the potential to  
18 mitigate the future burden of multimorbidity in the population.  
19  
20  
21  
22  
23  
24  
25  
26  
27  
28  
29  
30  
31  
32  
33  
34  
35  
36  
37  
38  
39  
40  
41  
42  
43  
44  
45  
46  
47  
48  
49  
50  
51  
52  
53  
54  
55  
56  
57  
58  
59  
60

## References

- 1 The Academy of Medical Sciences. Multimorbidity: a priority for global health research | The Academy of Medical Sciences. 2018. <https://acmedsci.ac.uk/policy/policy-projects/multimorbidity>
- 2 King DE, Xiang J, Pilkerton CS. Multi-morbidity Trends in United States adults, 1988–2014. *J Am Board Fam Med* 2018;**31**:503–13. doi:10.3122/jabfm.2018.04.180008
- 3 Barnett K, Mercer SW, Norbury M, *et al*. Epidemiology of multimorbidity and implications for health care, research, and medical education: a cross-sectional study. *The Lancet* 2012;**380**:37–43. doi:10.1016/S0140-6736(12)60240-2
- 4 Johnston MC, Crilly M, Black C, *et al*. Defining and measuring multimorbidity: a systematic review of systematic reviews. *Eur J Public Health* 2019;**29**:182–9. doi:10.1093/eurpub/cky098
- 5 van den Akker M, Buntinx F, Knottnerus JA. Comorbidity or multimorbidity. *European Journal of General Practice* 1996;**2**:65–70. doi:10.3109/13814789609162146
- 6 Marengoni A, Angleman S, Melis R, *et al*. Aging with multimorbidity: A systematic review of the literature. *Ageing Research Reviews* 2011;**10**:430–9. doi:10.1016/j.arr.2011.03.003
- 7 Feinstein AR. THE PRE-THERAPEUTIC CLASSIFICATION OF CO-MORBIDITY IN CHRONIC DISEASE. *J Chronic Dis* 1970;**23**:455–68. doi:10.1016/0021-9681(70)90054-8
- 8 Charlson ME, Pompei P, Ales KL, *et al*. A new method of classifying prognostic comorbidity in longitudinal studies: Development and validation. *Journal of Chronic Diseases* 1987;**40**:373–83. doi:10.1016/0021-9681(87)90171-8
- 9 Romano PS, Roos LL, Jollis JG. Presentation adapting a clinical comorbidity index for use with ICD-9-CM administrative data: Differing perspectives. *Journal of Clinical Epidemiology* 1993;**46**:1075–9. doi:10.1016/0895-4356(93)90103-8
- 10 Groot V de, Beckerman H, Lankhorst GJ, *et al*. How to measure comorbidity: a critical review of available methods. *Journal of Clinical Epidemiology* 2003;**56**:221–9. doi:10.1016/S0895-4356(02)00585-1
- 11 Extermann M. Measurement and impact of comorbidity in older cancer patients. *Critical Reviews in Oncology/Hematology* 2000;**35**:181–200. doi:10.1016/S1040-8428(00)00090-1
- 12 Quan H, Sundararajan V, Halfon P, *et al*. Coding Algorithms for Defining Comorbidities in ICD-9-CM and ICD-10 Administrative Data: *Medical Care* 2005;**43**:1130–9. doi:10.1097/01.mlr.0000182534.19832.83
- 13 Menendez ME, Neuhaus V, van Dijk CN, *et al*. The Elixhauser Comorbidity Method Outperforms the Charlson Index in Predicting Inpatient Death After Orthopaedic Surgery. *Clin Orthop Relat Res* 2014;**472**:2878–86. doi:10.1007/s11999-014-3686-7
- 14 Quan H, Li B, Couris CM, *et al*. Updating and Validating the Charlson Comorbidity Index and Score for Risk Adjustment in Hospital Discharge Abstracts Using Data From 6 Countries. *Am J Epidemiol* 2011;**173**:676–82. doi:10.1093/aje/kwq433
- 15 Sharabiani MTA, Aylin P, Bottle A. Systematic Review of Comorbidity Indices for Administrative Data: *Medical Care* 2012;**50**:1109–18. doi:10.1097/MLR.0b013e31825f64d0

- 1  
2 16 Caughey GE, Ramsay EN, Vitry AI, *et al.* Comorbid chronic diseases, discordant impact on mortality in  
3 older people: a 14-year longitudinal population study. *Journal of Epidemiology & Community Health*  
4 2010;**64**:1036–42. doi:10.1136/jech.2009.088260  
5
- 6 17 Lund Jensen N, Pedersen HS, Vestergaard M, *et al.* The impact of socioeconomic status and  
7 multimorbidity on mortality: a population-based cohort study. *Clin Epidemiol* 2017;**9**:279–89.  
8 doi:10.2147/CLEP.S129415  
9
- 10 18 Stanley J, Sarfati D. The new measuring multimorbidity index predicted mortality better than Charlson  
11 and Elixhauser indices among the general population. *Journal of Clinical Epidemiology* 2017;**92**:99–110.  
12 doi:10.1016/j.jclinepi.2017.08.005  
13
- 14 19 Teh RO, Menzies OH, Connolly MJ, *et al.* Patterns of multi-morbidity and prediction of hospitalisation  
15 and all-cause mortality in advanced age. *Age Ageing* 2018;**47**:261–8. doi:10.1093/ageing/afx184  
16
- 17 20 Nunes BP, Flores TR, Mielke GI, *et al.* Multimorbidity and mortality in older adults: A systematic review  
18 and meta-analysis. *Archives of Gerontology and Geriatrics* 2016;**67**:130–8.  
19 doi:10.1016/j.archger.2016.07.008  
20
- 21 21 Freisling H, Viallon V, Lennon H, *et al.* Lifestyle factors and risk of multimorbidity of cancer and  
22 cardiometabolic diseases: a multinational cohort study. *BMC Medicine* 2020;**18**:5. doi:10.1186/s12916-  
23 019-1474-7  
24
- 25 22 Kivimäki M, Kuosma E, Ferrie JE, *et al.* Overweight, obesity, and risk of cardiometabolic multimorbidity:  
26 pooled analysis of individual-level data for 120 813 adults from 16 cohort studies from the USA and  
27 Europe. *The Lancet Public Health* 2017;**2**:e277–85. doi:10.1016/S2468-2667(17)30074-9  
28
- 29 23 Gijsen R, Hoeymans N, Schellevis FG, *et al.* Causes and consequences of comorbidity: A review. *Journal*  
30 *of Clinical Epidemiology* 2001;**54**:661–74. doi:10.1016/S0895-4356(00)00363-2  
31
- 32 24 Wikström K, Lindström J, Harald K, *et al.* Clinical and lifestyle-related risk factors for incident  
33 multimorbidity: 10-year follow-up of Finnish population-based cohorts 1982–2012. *European Journal of*  
34 *Internal Medicine* 2015;**26**:211–6. doi:10.1016/j.ejim.2015.02.012  
35
- 36 25 Dhalwani NN, Zaccardi F, O'Donovan G, *et al.* Association Between Lifestyle Factors and the Incidence  
37 of Multimorbidity in an Older English Population. *J Gerontol A Biol Sci Med Sci* 2017;**72**:528–34.  
38 doi:10.1093/gerona/glw146  
39
- 40 26 Mounce LTA, Campbell JL, Henley WE, *et al.* Predicting Incident Multimorbidity. *Ann Fam Med*  
41 2018;**16**:322–9. doi:10.1370/afm.2271  
42
- 43 27 Luben R, Hayat S, Wareham N, *et al.* Usual physical activity and subsequent hospital usage over  
44 20 years in a general population: the EPIC-Norfolk cohort. *BMC Geriatrics* 2020;**20**:165.  
45 doi:10.1186/s12877-020-01573-0  
46
- 47 28 Luben R, Hayat S, Khawaja A, *et al.* Residential area deprivation and risk of subsequent hospital  
48 admission in a British population: the EPIC-Norfolk cohort. *BMJ Open* 2019;**9**. doi:10.1136/bmjopen-  
49 2019-031251  
50
- 51 29 Luben R, Hayat S, Wareham N, *et al.* Predicting admissions and time spent in hospital over a decade in  
52 a population-based record linkage study: the EPIC-Norfolk cohort. *BMJ Open* 2016;**6**:e009461.  
53 doi:10.1136/bmjopen-2015-009461  
54
- 55  
56  
57  
58  
59  
60

- 1  
2 30 Day N, Oakes S, Luben R, *et al.* EPIC-Norfolk: study design and characteristics of the cohort. *European*  
3 *Prospective Investigation of Cancer. Br J Cancer* 1999;**80 Suppl 1**:95–103.  
4  
5 31 Hayat SA, Luben R, Keevil VL, *et al.* Cohort Profile: A prospective cohort study of objective physical and  
6 cognitive capability and visual health in an ageing population of men and women in Norfolk (EPIC-  
7 Norfolk 3). *Int J Epidemiol* 2014;**43**:1063–72. doi:10.1093/ije/dyt086  
8  
9 32 Vuilleumier JP, Keck E. Fluorometric assay of vitamin C in biological materials using a centrifugal  
10 analyser with fluorescence attachment. *Journal of micronutrient analysis* Published Online First:  
11 1989.<http://agris.fao.org/agris-search/search.do?recordID=US201301738860>  
12  
13 33 Bland R. Measuring “Social Class”: A Discussion of the Registrar-General’s Classification. *Sociology*  
14 1979;**13**:283–91. doi:10.1177/003803857901300209  
15  
16 34 McFadden E, Luben R, Khaw K-T. Different measures of social class in women and mortality. *Eur J*  
17 *Epidemiol* 2009;**24**:231–6. doi:10.1007/s10654-009-9332-0  
18  
19 35 Wareham NJ, Jakes RW, Rennie KL, *et al.* Validity and repeatability of a simple index derived from the  
20 short physical activity questionnaire used in the European Prospective Investigation into Cancer and  
21 Nutrition (EPIC) study. *Public Health Nutrition* 2003;**6**:407–13. doi:10.1079/PHN2002439  
22  
23 36 Khaw K-T, Jakes R, Bingham S, *et al.* Work and leisure time physical activity assessed using a simple,  
24 pragmatic, validated questionnaire and incident cardiovascular disease and all-cause mortality in men  
25 and women: The European Prospective Investigation into Cancer in Norfolk prospective population  
26 study. *Int J Epidemiol* 2006;**35**:1034–43. doi:10.1093/ije/dyl079  
27  
28 37 Gasparini A. comorbidity: An R package for computing comorbidity scores. *JOSS* 2018;**3**:648.  
29 doi:10.21105/joss.00648  
30  
31 38 Khaw K-T, Wareham N, Bingham S, *et al.* Combined Impact of Health Behaviours and Mortality in Men  
32 and Women: The EPIC-Norfolk Prospective Population Study. *PLOS Medicine* 2008;**5**:e12.  
33 doi:10.1371/journal.pmed.0050012  
34  
35 39 Wallace E, McDowell R, Bennett K, *et al.* Comparison of count-based multimorbidity measures in  
36 predicting emergency admission and functional decline in older community-dwelling adults: a  
37 prospective cohort study. *BMJ Open* 2016;**6**. doi:10.1136/bmjopen-2016-013089  
38  
39 40 Department of Health UK. Long Term Conditions Compendium of Information: Third Edition. 2012.  
40 [https://www.gov.uk/government/publications/long-term-conditions-compendium-of-information-](https://www.gov.uk/government/publications/long-term-conditions-compendium-of-information-third-edition)  
41 [third-edition](https://www.gov.uk/government/publications/long-term-conditions-compendium-of-information-third-edition)  
42  
43 41 Elixhauser A, Steiner C, Harris DR, *et al.* Comorbidity Measures for Use with Administrative Data:  
44 *Medical Care* 1998;**36**:8–27. doi:10.1097/00005650-199801000-00004  
45  
46 42 Librero J, Peiró S, Ordiñana R. Chronic Comorbidity and Outcomes of Hospital Care: Length of Stay,  
47 Mortality, and Readmission at 30 and 365 Days. *Journal of Clinical Epidemiology* 1999;**52**:171–9.  
48 doi:10.1016/S0895-4356(98)00160-7  
49  
50 43 Palladino R, Tayu Lee J, Ashworth M, *et al.* Associations between multimorbidity, healthcare utilisation  
51 and health status: evidence from 16 European countries. *Age Ageing* 2016;**45**:431–5.  
52 doi:10.1093/ageing/afw044  
53  
54 44 Nguyen H, Manolova G, Daskalopoulou C, *et al.* Prevalence of multimorbidity in community settings: A  
55  
56  
57  
58  
59  
60



1  
2  
3  
4  
5  
6  
7  
8  
9  
10  
11  
12  
13  
14  
15  
16  
17  
18  
19  
20  
21  
22  
23  
24  
25  
26  
27  
28  
29  
30  
31  
32  
33  
34  
35  
36  
37  
38  
39  
40  
41  
42  
43  
44  
45  
46  
47  
48  
49  
50  
51  
52  
53  
54  
55  
56  
57  
58  
59  
60

systematic review and meta-analysis of observational studies. *J Comorb* 2019;**9**:2235042X1987093. doi:10.1177/2235042X19870934

- 45 Lai FTT, Wong SYS, Yip BHK, *et al.* Multimorbidity in middle age predicts more subsequent hospital admissions than in older age: A nine-year retrospective cohort study of 121,188 discharged in-patients. *European Journal of Internal Medicine* 2019;**61**:103–11. doi:10.1016/j.ejim.2018.12.001
- 46 Violán C, Foguet-Boreu Q, Roso-Llorach A, *et al.* Burden of multimorbidity, socioeconomic status and use of health services across stages of life in urban areas: a cross-sectional study. *BMC Public Health* 2014;**14**:530. doi:10.1186/1471-2458-14-530
- 47 Chung RY, Mercer S, Lai FTT, *et al.* Socioeconomic Determinants of Multimorbidity: A Population-Based Household Survey of Hong Kong Chinese. *PLOS ONE* 2015;**10**:e0140040. doi:10.1371/journal.pone.0140040
- 48 Alimohammadian M, Majidi A, Yaseri M, *et al.* Multimorbidity as an important issue among women: results of a gender difference investigation in a large population-based cross-sectional study in West Asia. *BMJ Open* 2017;**7**. doi:10.1136/bmjopen-2016-013548
- 49 Cassell A, Edwards D, Harshfield A, *et al.* The epidemiology of multimorbidity in primary care: a retrospective cohort study. *Br J Gen Pract* 2018;**68**:e245–51. doi:10.3399/bjgp18X695465
- 50 Nagel G, Peter R, Braig S, *et al.* The impact of education on risk factors and the occurrence of multimorbidity in the EPIC-Heidelberg cohort. *BMC Public Health* 2008;**8**:384. doi:10.1186/1471-2458-8-384
- 51 Katikireddi SV, Skivington K, Leyland AH, *et al.* The contribution of risk factors to socioeconomic inequalities in multimorbidity across the lifecourse: a longitudinal analysis of the Twenty-07 cohort. *BMC Med* 2017;**15**. doi:10.1186/s12916-017-0913-6

## Supplementary material

Supplementary Table S1 | Descriptive characteristics at TP2 in 9814 men and women aged 48–92 by 10-year Charlson Comorbidity Index, 2009–2019

Supplementary Table S2 | Multivariable logistic regression of risk factors for Charlson 5-year and 10-year hospital admissions with multimorbidity at TP2 in 9814 men and women

Supplementary Table S3 | Multivariable logistic regression of risk factors excluding participants with prevalent CVD, cancer or diabetes at TP2 for Charlson 5-year and 10-year hospital admissions with multimorbidity at TP2 in 8185 men and women

Supplementary Table S4 | Charlson Comorbidity Index, ICD-10 codes and weighting



1  
2  
3  
4  
5  
6  
7  
8  
9  
10  
11  
12  
13  
14  
15  
16  
17  
18  
19  
20  
21  
22  
23  
24  
25  
26  
27  
28  
29  
30  
31  
32  
33  
34  
35  
36  
37  
38  
39  
40  
41  
42  
43  
44  
45  
46  
47  
48  
49  
50  
51  
52  
53  
54  
55  
56  
57  
58  
59  
60

For peer review only

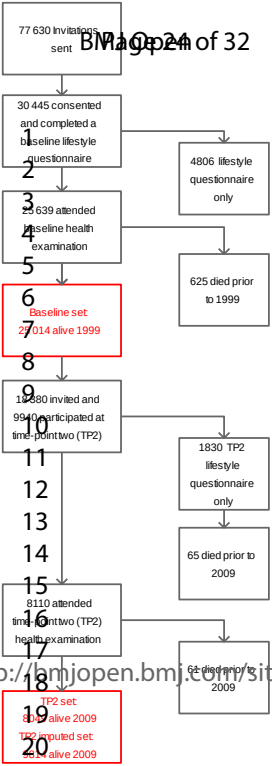

1  
2  
3  
4  
5  
6  
7  
8  
9  
10  
11  
12  
13  
14  
15  
16  
17  
18  
19  
20

Baseline set  
25 014 alive 1999

TP2 set  
8047 alive 2009  
TP2 imputed set  
8014 alive 2009

26  
27  
28  
29  
30  
31  
32  
33  
34  
35

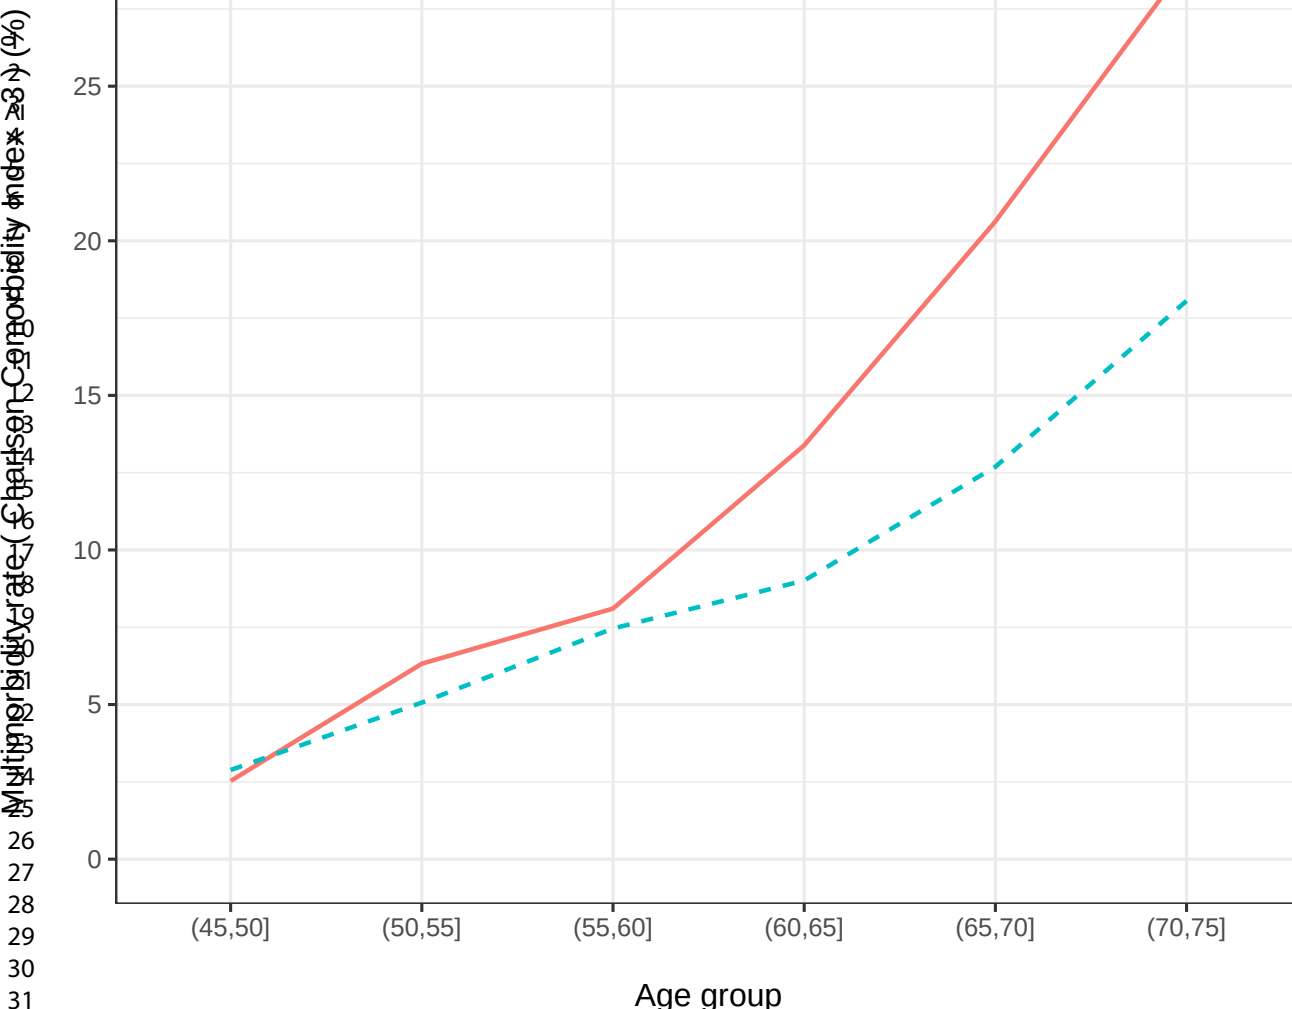

Sex  
— Men  
- - Women

# Sociodemographic and lifestyle predictors of incident hospital admissions with multimorbidity in a general population 1999–2019: the EPIC-Norfolk cohort

## Supplementary material

Supplementary Table S1 | Descriptive characteristics at TP2 in 9814 men and women aged 48–92 by 10-year Charlson Comorbidity Index, 2009–2019

Supplementary Table S2 | Multivariable logistic regression of risk factors for Charlson 5-year and 10-year hospital admissions with multimorbidity at TP2 in 9814 men and women

Supplementary Table S3 | Multivariable logistic regression of risk factors excluding participants with prevalent CVD, cancer or diabetes at TP2 for Charlson 5-year and 10-year hospital admissions with multimorbidity at TP2 in 8185 men and women

Supplementary Table S4 | Charlson Comorbidity Index, ICD-10 codes and weighting

### Supplementary Table S1 | Descriptive characteristics at TP2 in 9814 men and women aged 48–92 by 10-year Charlson Comorbidity Index, 2009–2019

|                                                      | Total       | No admissions | Charlson 0  | Charlson 1  | Charlson 2  | Charlson ≥3 |
|------------------------------------------------------|-------------|---------------|-------------|-------------|-------------|-------------|
| <b>Hospital duration 2009–2019, days</b>             |             |               |             |             |             |             |
| Mean ±SD                                             | 17.7 ±36.2  | 0.0 ±0.0      | 6.5 ±14.0   | 19.3 ±42.8  | 26.1 ±42.2  | 46.3 ±48.1  |
| <b>Total hospital admissions 2009–2019</b>           |             |               |             |             |             |             |
| Mean ±SD                                             | 4.4 ±7.9    | 0.0 ±0.0      | 2.8 ±3.0    | 4.5 ±6.0    | 6.0 ±6.7    | 10.1 ±13.5  |
| <b>Age at TP2, years</b>                             |             |               |             |             |             |             |
| Mean ±SD                                             | 69.4 ±8.4   | 65.1 ±7.7     | 67.6 ±7.7   | 70.5 ±8.1   | 71.7 ±8.1   | 74.1 ±7.8   |
| <b>Sex (n (%))</b>                                   |             |               |             |             |             |             |
| Men                                                  | 4252        | 695 (16.3)    | 1294 (30.4) | 631 (14.8)  | 558 (13.1)  | 1074 (25.3) |
| Women                                                | 5562        | 1166 (21.0)   | 1956 (35.2) | 914 (16.4)  | 618 (11.1)  | 908 (16.3)  |
| <b>Body mass index at TP2, kg/m<sup>2</sup></b>      |             |               |             |             |             |             |
| Mean ±SD                                             | 26.9 ±4.3   | 26.2 ±4.3     | 26.5 ±4.0   | 27.3 ±4.4   | 27.3 ±4.5   | 27.7 ±4.5   |
| <b>Cigarette smoking at TP2 (n (%))</b>              |             |               |             |             |             |             |
| Current                                              | 442         | 88 (19.9)     | 116 (26.2)  | 65 (14.7)   | 79 (17.9)   | 94 (21.3)   |
| Former                                               | 4508        | 755 (16.7)    | 1375 (30.5) | 741 (16.4)  | 565 (12.5)  | 1072 (23.8) |
| Never                                                | 4864        | 1018 (20.9)   | 1759 (36.2) | 739 (15.2)  | 532 (10.9)  | 816 (16.8)  |
| <b>Social class dichotomised (n (%))</b>             |             |               |             |             |             |             |
| Non-manual                                           | 6294        | 1205 (19.1)   | 2127 (33.8) | 993 (15.8)  | 749 (11.9)  | 1220 (19.4) |
| Manual                                               | 3411        | 636 (18.6)    | 1087 (31.9) | 528 (15.5)  | 424 (12.4)  | 736 (21.6)  |
| <b>Level of education (n (%))</b>                    |             |               |             |             |             |             |
| Higher level                                         | 7025        | 1460 (20.8)   | 2419 (34.4) | 1074 (15.3) | 791 (11.3)  | 1281 (18.2) |
| Lower level                                          | 2787        | 401 (14.4)    | 830 (29.8)  | 471 (16.9)  | 385 (13.8)  | 700 (25.1)  |
| <b>Simple physical activity index at TP2 (n (%))</b> |             |               |             |             |             |             |
| Inactive                                             | 3924        | 592 (15.1)    | 1072 (27.3) | 687 (17.5)  | 545 (13.9)  | 1028 (26.2) |
| Moderately inactive                                  | 2682        | 555 (20.7)    | 940 (35.0)  | 404 (15.1)  | 311 (11.6)  | 472 (17.6)  |
| Moderately active                                    | 1654        | 387 (23.4)    | 604 (36.5)  | 231 (14.0)  | 167 (10.1)  | 265 (16.0)  |
| Active                                               | 1442        | 313 (21.7)    | 601 (41.7)  | 195 (13.5)  | 139 (9.6)   | 194 (13.5)  |
| <b>Alcohol intake at TP2, units per week</b>         |             |               |             |             |             |             |
| Mean ±SD                                             | 5.7 ±8.2    | 6.3 ±8.0      | 5.8 ±7.9    | 5.5 ±8.3    | 5.3 ±7.8    | 5.5 ±9.1    |
| <b>Plasma vitamin C at TP2, µmol/L</b>               |             |               |             |             |             |             |
| Mean ±SD                                             | 63.0 ±22.2  | 66.0 ±21.5    | 65.7 ±21.6  | 63.2 ±22.8  | 59.9 ±22.4  | 57.7 ±21.9  |
| <b>Systolic blood pressure at TP2, mmHg</b>          |             |               |             |             |             |             |
| Mean ±SD                                             | 136.5 ±17.1 | 134.7 ±15.9   | 135.8 ±16.3 | 138.5 ±18.4 | 136.6 ±16.8 | 138.0 ±18.1 |
| <b>Total cholesterol at TP2, mmol/L</b>              |             |               |             |             |             |             |
| Mean ±SD                                             | 5.4 ±1.1    | 5.6 ±1.1      | 5.5 ±1.1    | 5.3 ±1.1    | 5.2 ±1.2    | 5.0 ±1.2    |
| <b>Prevalent heart attack at TP2 (n (%))</b>         |             |               |             |             |             |             |
| No reported heart attack at TP2                      | 9455        | 1833 (19.4)   | 3211 (34.0) | 1499 (15.9) | 1116 (11.8) | 1796 (19.0) |
| Self-reported heart attack at TP2                    | 359         | 28 (7.8)      | 39 (10.9)   | 46 (12.8)   | 60 (16.7)   | 186 (51.8)  |
| <b>Prevalent stroke at TP2 (n (%))</b>               |             |               |             |             |             |             |
| No reported stroke at TP2                            | 9577        | 1843 (19.2)   | 3215 (33.6) | 1510 (15.8) | 1141 (11.9) | 1868 (19.5) |
| Self-reported stroke at TP2                          | 237         | 18 (7.6)      | 35 (14.8)   | 35 (14.8)   | 35 (14.8)   | 114 (48.1)  |
| <b>Prevalent cancer at TP2 (n (%))</b>               |             |               |             |             |             |             |
| No reported cancer at TP2                            | 8888        | 1744 (19.6)   | 2987 (33.6) | 1398 (15.7) | 1052 (11.8) | 1707 (19.2) |
| Self-reported cancer at TP2                          | 926         | 117 (12.6)    | 263 (28.4)  | 147 (15.9)  | 124 (13.4)  | 275 (29.7)  |
| <b>Prevalent diabetes at TP2 (n (%))</b>             |             |               |             |             |             |             |
| No reported diabetes at TP2                          | 9477        | 1834 (19.4)   | 3238 (34.2) | 1477 (15.6) | 1124 (11.9) | 1804 (19.0) |
| Self-reported diabetes at TP2                        | 337         | 27 (8.0)      | 12 (3.6)    | 68 (20.2)   | 52 (15.4)   | 178 (52.8)  |

**Supplementary Table S2 | Multivariable logistic regression of risk factors for Charlson 5-year and 10-year hospital admissions with multimorbidity at TP2 in 9814 men and women**

|                                   | Charlson 5-year multimorbidity †, 2009–2014<br>OR (95% CI) | p value | Charlson 10-year multimorbidity †, 2009–2019<br>OR (95% CI) | p value |
|-----------------------------------|------------------------------------------------------------|---------|-------------------------------------------------------------|---------|
| <b>Model 1</b>                    |                                                            |         |                                                             |         |
| Male sex                          | 1.67 (1.46–1.91)                                           | < 0.001 | 1.72 (1.55–1.91)                                            | < 0.001 |
| Age per 10 years                  | 2.35 (2.16–2.56)                                           | < 0.001 | 2.36 (2.21–2.53)                                            | < 0.001 |
| Manual social class at baseline   | 1.02 (0.88–1.18)                                           | 0.774   | 1.11 (0.99–1.24)                                            | 0.072   |
| Lower education level at baseline | 1.12 (0.96–1.30)                                           | 0.154   | 1.26 (1.12–1.42)                                            | < 0.001 |
| <b>Model 2</b>                    |                                                            |         |                                                             |         |
| Male sex                          | 1.60 (1.39–1.84)                                           | < 0.001 | 1.65 (1.48–1.84)                                            | < 0.001 |
| Age per 10 years                  | 2.19 (2.00–2.39)                                           | < 0.001 | 2.22 (2.07–2.38)                                            | < 0.001 |
| Manual social class at baseline   | 1.01 (0.87–1.18)                                           | 0.850   | 1.11 (0.99–1.24)                                            | 0.082   |
| Lower education level at baseline | 1.10 (0.94–1.29)                                           | 0.215   | 1.25 (1.11–1.41)                                            | < 0.001 |
| Prevalent CVD                     | 2.25 (1.78–2.81)                                           | < 0.001 | 2.60 (2.13–3.18)                                            | < 0.001 |
| Prevalent cancer                  | 1.83 (1.50–2.22)                                           | < 0.001 | 1.61 (1.37–1.90)                                            | < 0.001 |
| Prevalent diabetes                | 3.96 (3.08–5.08)                                           | < 0.001 | 3.91 (3.09–4.96)                                            | < 0.001 |
| <b>Model 3</b>                    |                                                            |         |                                                             |         |
| Male sex                          | 1.44 (1.24–1.67)                                           | < 0.001 | 1.52 (1.35–1.71)                                            | < 0.001 |
| Age per 10 years                  | 2.14 (1.95–2.35)                                           | < 0.001 | 2.23 (2.07–2.39)                                            | < 0.001 |
| Manual social class at baseline   | 0.97 (0.83–1.13)                                           | 0.692   | 1.07 (0.95–1.20)                                            | 0.287   |
| Lower education level at baseline | 1.04 (0.89–1.22)                                           | 0.598   | 1.20 (1.06–1.35)                                            | 0.004   |
| Current smoker                    | 1.44 (1.02–1.99)                                           | 0.032   | 1.45 (1.11–1.86)                                            | 0.005   |
| BMI>30 kg/m <sup>2</sup>          | 1.38 (1.17–1.63)                                           | < 0.001 | 1.54 (1.35–1.75)                                            | < 0.001 |
| Alcohol intake, units per week    | 1.00 (0.99–1.01)                                           | 0.611   | 1.00 (0.99–1.01)                                            | 0.664   |
| Physically inactive               | 1.30 (1.12–1.50)                                           | < 0.001 | 1.13 (1.01–1.26)                                            | 0.034   |
| Plasma vitamin C per SD           | 0.80 (0.74–0.87)                                           | < 0.001 | 0.83 (0.79–0.88)                                            | < 0.001 |
| Prevalent CVD                     | 2.11 (1.67–2.64)                                           | < 0.001 | 2.46 (2.01–3.02)                                            | < 0.001 |
| Prevalent cancer                  | 1.81 (1.48–2.20)                                           | < 0.001 | 1.61 (1.36–1.89)                                            | < 0.001 |
| Prevalent diabetes                | 3.55 (2.75–4.56)                                           | < 0.001 | 3.47 (2.74–4.41)                                            | < 0.001 |
| <b>Model 4</b>                    |                                                            |         |                                                             |         |
| Male sex                          | 1.35 (1.15–1.58)                                           | < 0.001 | 1.41 (1.25–1.60)                                            | < 0.001 |
| Age per 10 years                  | 2.11 (1.92–2.32)                                           | < 0.001 | 2.20 (2.04–2.37)                                            | < 0.001 |
| Manual social class at baseline   | 0.97 (0.83–1.13)                                           | 0.692   | 1.07 (0.95–1.20)                                            | 0.287   |
| Lower education level at baseline | 1.04 (0.89–1.22)                                           | 0.609   | 1.20 (1.06–1.35)                                            | 0.004   |
| Current smoker                    | 1.43 (1.02–1.98)                                           | 0.034   | 1.44 (1.10–1.85)                                            | 0.006   |
| BMI>30 kg/m <sup>2</sup>          | 1.37 (1.16–1.62)                                           | < 0.001 | 1.53 (1.34–1.74)                                            | < 0.001 |
| Alcohol intake, units per week    | 1.00 (0.99–1.01)                                           | 0.449   | 1.00 (1.00–1.01)                                            | 0.416   |
| Physically inactive               | 1.29 (1.12–1.50)                                           | < 0.001 | 1.13 (1.01–1.26)                                            | 0.038   |
| Plasma vitamin C per SD           | 0.81 (0.75–0.87)                                           | < 0.001 | 0.84 (0.79–0.89)                                            | < 0.001 |
| Systolic blood pressure per SD    | 0.99 (0.92–1.07)                                           | 0.854   | 0.99 (0.94–1.05)                                            | 0.769   |
| Total cholesterol per SD          | 0.91 (0.84–0.98)                                           | 0.014   | 0.89 (0.84–0.95)                                            | < 0.001 |
| Prevalent CVD                     | 2.02 (1.60–2.54)                                           | < 0.001 | 2.34 (1.91–2.87)                                            | < 0.001 |
| Prevalent cancer                  | 1.81 (1.48–2.20)                                           | < 0.001 | 1.60 (1.36–1.89)                                            | < 0.001 |
| Prevalent diabetes                | 3.28 (2.52–4.24)                                           | < 0.001 | 3.16 (2.48–4.03)                                            | < 0.001 |

† Charlson Comorbidity Index  $\geq 3$  vs Charlson  $\leq 2$  or no hospital admission.

**Supplementary Table S3 | Multivariable logistic regression of risk factors excluding participants with prevalent CVD, cancer or diabetes at TP2 for Charlson 5-year and 10-year hospital admissions with multimorbidity at TP2 in 8185 men and women**

|                                   | Charlson 5-year multimorbidity †, 2009–2014<br>OR (95% CI) | p value | Charlson 10-year multimorbidity †, 2009–2019<br>OR (95% CI) | p value |
|-----------------------------------|------------------------------------------------------------|---------|-------------------------------------------------------------|---------|
| <b>Model 1</b>                    |                                                            |         |                                                             |         |
| Male sex                          | 1.44 (1.22–1.70)                                           | < 0.001 | 1.55 (1.37–1.75)                                            | < 0.001 |
| Age per 10 years                  | 2.36 (2.13–2.62)                                           | < 0.001 | 2.39 (2.21–2.58)                                            | < 0.001 |
| Manual social class at baseline   | 0.99 (0.82–1.18)                                           | 0.888   | 1.11 (0.97–1.27)                                            | 0.122   |
| Lower education level at baseline | 1.12 (0.93–1.36)                                           | 0.220   | 1.26 (1.09–1.44)                                            | 0.001   |
| <b>Model 2</b>                    |                                                            |         |                                                             |         |
| Male sex                          | 1.25 (1.05–1.50)                                           | 0.015   | 1.39 (1.22–1.59)                                            | < 0.001 |
| Age per 10 years                  | 2.36 (2.12–2.63)                                           | < 0.001 | 2.43 (2.24–2.64)                                            | < 0.001 |
| Manual social class at baseline   | 0.93 (0.78–1.12)                                           | 0.471   | 1.06 (0.93–1.22)                                            | 0.373   |
| Lower education level at baseline | 1.06 (0.88–1.29)                                           | 0.518   | 1.21 (1.05–1.39)                                            | 0.008   |
| Current smoker                    | 1.81 (1.23–2.59)                                           | 0.002   | 1.66 (1.24–2.20)                                            | < 0.001 |
| BMI>30 kg/m <sup>2</sup>          | 1.42 (1.16–1.73)                                           | < 0.001 | 1.60 (1.38–1.86)                                            | < 0.001 |
| Alcohol intake, units per week    | 1.01 (1.00–1.02)                                           | 0.238   | 1.01 (1.00–1.01)                                            | 0.109   |
| Physically inactive               | 1.18 (0.99–1.41)                                           | 0.061   | 1.10 (0.97–1.26)                                            | 0.138   |
| Plasma vitamin C per SD           | 0.79 (0.72–0.86)                                           | < 0.001 | 0.83 (0.77–0.88)                                            | < 0.001 |
| <b>Model 3</b>                    |                                                            |         |                                                             |         |
| Male sex                          | 1.16 (0.96–1.40)                                           | 0.135   | 1.29 (1.12–1.49)                                            | < 0.001 |
| Age per 10 years                  | 2.29 (2.05–2.57)                                           | < 0.001 | 2.39 (2.20–2.60)                                            | < 0.001 |
| Manual social class at baseline   | 0.93 (0.77–1.12)                                           | 0.446   | 1.06 (0.93–1.21)                                            | 0.385   |
| Lower education level at baseline | 1.06 (0.88–1.28)                                           | 0.534   | 1.21 (1.05–1.39)                                            | 0.009   |
| Current smoker                    | 1.81 (1.23–2.59)                                           | 0.002   | 1.64 (1.23–2.18)                                            | < 0.001 |
| BMI>30 kg/m <sup>2</sup>          | 1.39 (1.14–1.70)                                           | 0.001   | 1.59 (1.36–1.84)                                            | < 0.001 |
| Alcohol intake, units per week    | 1.01 (1.00–1.02)                                           | 0.163   | 1.01 (1.00–1.02)                                            | 0.054   |
| Physically inactive               | 1.18 (0.99–1.40)                                           | 0.071   | 1.10 (0.96–1.25)                                            | 0.161   |
| Plasma vitamin C per SD           | 0.79 (0.72–0.87)                                           | < 0.001 | 0.83 (0.77–0.89)                                            | < 0.001 |
| Systolic blood pressure per SD    | 1.03 (0.95–1.12)                                           | 0.466   | 0.99 (0.93–1.06)                                            | 0.866   |
| Total cholesterol per SD          | 0.88 (0.80–0.96)                                           | 0.005   | 0.89 (0.83–0.95)                                            | < 0.001 |

† Charlson Comorbidity Index  $\geq 3$  vs Charlson  $\leq 2$  or no hospital admission.

**Supplementary Table S4 | Charlson Comorbidity Index, ICD-10 codes and weighting**

|                                                                                     | ICD-10 codes                                                                                                                                                                  |
|-------------------------------------------------------------------------------------|-------------------------------------------------------------------------------------------------------------------------------------------------------------------------------|
| Myocardial infarction                                                               | I21.x, I22.x, I25.2                                                                                                                                                           |
| Congestive heart failure                                                            | I09.9, I11.0, I13.0, I13.2, I25.5, I42.0, I42.5–I42.9, I43.x, I50.x, P29.0                                                                                                    |
| Peripheral vascular disease                                                         | I70.x, I71.x, I73.1, I73.8, I73.9, I77.1, I79.0, I79.2, K55.1, K55.8, K55.9, Z95.8, Z95.9                                                                                     |
| Cerebrovascular disease                                                             | G45.x, G46.x, H34.0, I60.x–I69.x                                                                                                                                              |
| Dementia                                                                            | F00.x–F03.x, F05.1, G30.x, G31.1                                                                                                                                              |
| Chronic pulmonary disease                                                           | I27.8, I27.9, J40.x–J47.x, J60.x–J67.x, J68.4, J70.1, J70.3                                                                                                                   |
| Rheumatic disease                                                                   | M05.x, M06.x, M31.5, M32.x–M34.x, M35.1, M35.3, M36.0                                                                                                                         |
| Peptic ulcer disease                                                                | K25.x–K28.x                                                                                                                                                                   |
| Mild liver disease                                                                  | B18.x, K70.0–K70.3, K70.9, K71.3–K71.5, K71.7, K73.x, K74.x, K76.0, K76.2–K76.4, K76.8, K76.9, Z94.4                                                                          |
| Diabetes without chronic complication                                               | E10.0, E10.1, E10.6, E10.8, E10.9, E11.0, E11.1, E11.6, E11.8, E11.9, E12.0, E12.1, E12.6, E12.8, E12.9, E13.0, E13.1, E13.6, E13.8, E13.9, E14.0, E14.1, E14.6, E14.8, E14.9 |
| Diabetes with chronic complication                                                  | E10.2–E10.5, E10.7, E11.2–E11.5, E11.7, E12.2–E12.5, E12.7, E13.2–E13.5, E13.7, E14.2–E14.5, E14.7                                                                            |
| Hemiplegia or paraplegia                                                            | G04.1, G11.4, G80.1, G80.2, G81.x, G82.x, G83.0–G83.4, G83.9                                                                                                                  |
| Renal disease                                                                       | I12.0, I13.1, N03.2–N03.7, N05.2–N05.7, N18.x, N19.x, N25.0, Z49.0–Z49.2, Z94.0, Z99.2                                                                                        |
| Any malignancy, including lymphoma and leukaemia, except malignant neoplasm of skin | C00.x–C26.x, C30.x–C34.x, C37.x–C41.x, C43.x, C45.x–C58.x, C60.x–C76.x, C81.x–C85.x, C88.x, C90.x–C97.x                                                                       |
| Moderate or severe liver disease                                                    | I85.0, I85.9, I86.4, I98.2, K70.4, K71.1, K72.1, K72.9, K76.5, K76.6, K76.7                                                                                                   |
| Metastatic solid tumour                                                             | C77.x–C80.x                                                                                                                                                                   |
| AIDS/HIV                                                                            | B20.x–B22.x, B24.x                                                                                                                                                            |

All comorbidities are assigned a weight of 1 except hemiplegia/paraplegia, renal disease, and malignancies (weight=2); moderate/severe liver disease (weight=3); metastatic solid tumour and AIDS/HIV (weight=6). For diseases with two levels of severity (liver disease, diabetes and cancer), the less severe version is assigned weight=0 if the more severe version is also present in a patient. Reproduced from documentation for the 'comorbidity' R package (Gasparini, 2019)



STROBE Statement—Checklist of items that should be included in reports of *cohort studies*

|                              | Item No | Recommendation                                                                                                                                                                                                        | Page No                    |
|------------------------------|---------|-----------------------------------------------------------------------------------------------------------------------------------------------------------------------------------------------------------------------|----------------------------|
| <b>Title and abstract</b>    | 1       | (a) Indicate the study's design with a commonly used term in the title or the abstract                                                                                                                                | 1                          |
|                              |         | (b) Provide in the abstract an informative and balanced summary of what was done and what was found                                                                                                                   | 2                          |
| <b>Introduction</b>          |         |                                                                                                                                                                                                                       |                            |
| Background/rationale         | 2       | Explain the scientific background and rationale for the investigation being reported                                                                                                                                  | 5                          |
| Objectives                   | 3       | State specific objectives, including any prespecified hypotheses                                                                                                                                                      | 5                          |
| <b>Methods</b>               |         |                                                                                                                                                                                                                       |                            |
| Study design                 | 4       | Present key elements of study design early in the paper                                                                                                                                                               | 6                          |
| Setting                      | 5       | Describe the setting, locations, and relevant dates, including periods of recruitment, exposure, follow-up, and data collection                                                                                       | 6-7                        |
| Participants                 | 6       | (a) Give the eligibility criteria, and the sources and methods of selection of participants. Describe methods of follow-up<br><br>(b) For matched studies, give matching criteria and number of exposed and unexposed | 6, Figure 1 - Flow diagram |
| Variables                    | 7       | Clearly define all outcomes, exposures, predictors, potential confounders, and effect modifiers. Give diagnostic criteria, if applicable                                                                              | 6-7                        |
| Data sources/<br>measurement | 8*      | For each variable of interest, give sources of data and details of methods of assessment (measurement). Describe comparability of assessment methods if there is more than one group                                  | 6-7                        |
| Bias                         | 9       | Describe any efforts to address potential sources of bias                                                                                                                                                             |                            |
| Study size                   | 10      | Explain how the study size was arrived at                                                                                                                                                                             | Figure 1 - Flow diagram    |
| Quantitative variables       | 11      | Explain how quantitative variables were handled in the analyses. If applicable, describe which groupings were chosen and why                                                                                          | 8 (statistical methods)    |
| Statistical methods          | 12      | (a) Describe all statistical methods, including those used to control for confounding<br><br>(b) Describe any methods used to examine subgroups and interactions                                                      | 8 (statistical methods)    |

|    |                  |                                                                                                                                                                                                       |                               |
|----|------------------|-------------------------------------------------------------------------------------------------------------------------------------------------------------------------------------------------------|-------------------------------|
| 1  |                  | (c) Explain how missing data were addressed                                                                                                                                                           | 8, statistical methods        |
| 2  |                  |                                                                                                                                                                                                       |                               |
| 3  |                  |                                                                                                                                                                                                       |                               |
| 4  |                  | (d) If applicable, explain how loss to follow-up was addressed                                                                                                                                        |                               |
| 5  |                  |                                                                                                                                                                                                       |                               |
| 6  |                  | (e) Describe any sensitivity analyses                                                                                                                                                                 |                               |
| 7  |                  |                                                                                                                                                                                                       |                               |
| 8  | <b>Results</b>   |                                                                                                                                                                                                       |                               |
| 9  |                  |                                                                                                                                                                                                       |                               |
| 10 | Participants     | 13* (a) Report numbers of individuals at each stage of study—eg numbers potentially eligible, examined for eligibility, confirmed eligible, included in the study, completing follow-up, and analysed | Figure 1 (Flow diagram)       |
| 11 |                  |                                                                                                                                                                                                       |                               |
| 12 |                  |                                                                                                                                                                                                       |                               |
| 13 |                  | (b) Give reasons for non-participation at each stage                                                                                                                                                  | 6, Figure 1 (Flow diagram)    |
| 14 |                  |                                                                                                                                                                                                       |                               |
| 15 |                  | (c) Consider use of a flow diagram                                                                                                                                                                    | Figure 1 (Flow diagram)       |
| 16 |                  |                                                                                                                                                                                                       |                               |
| 17 | Descriptive data | 14* (a) Give characteristics of study participants (eg demographic, clinical, social) and information on exposures and potential confounders                                                          | 8, Table 1, Table 2, Figure 2 |
| 18 |                  |                                                                                                                                                                                                       |                               |
| 19 |                  |                                                                                                                                                                                                       |                               |
| 20 |                  | (b) Indicate number of participants with missing data for each variable of interest                                                                                                                   | 8, statistical methods        |
| 21 |                  |                                                                                                                                                                                                       |                               |
| 22 |                  | (c) Summarise follow-up time (eg, average and total amount)                                                                                                                                           | 8, Title                      |
| 23 |                  |                                                                                                                                                                                                       |                               |
| 24 | Outcome data     | 15* Report numbers of outcome events or summary measures over time                                                                                                                                    | 8-9, Table 1                  |
| 25 |                  |                                                                                                                                                                                                       |                               |
| 26 |                  |                                                                                                                                                                                                       |                               |
| 27 |                  |                                                                                                                                                                                                       |                               |
| 28 |                  |                                                                                                                                                                                                       |                               |
| 29 |                  |                                                                                                                                                                                                       |                               |
| 30 |                  |                                                                                                                                                                                                       |                               |
| 31 |                  |                                                                                                                                                                                                       |                               |
| 32 |                  |                                                                                                                                                                                                       |                               |
| 33 |                  |                                                                                                                                                                                                       |                               |
| 34 |                  |                                                                                                                                                                                                       |                               |
| 35 |                  |                                                                                                                                                                                                       |                               |
| 36 |                  |                                                                                                                                                                                                       |                               |
| 37 |                  |                                                                                                                                                                                                       |                               |
| 38 |                  |                                                                                                                                                                                                       |                               |
| 39 |                  |                                                                                                                                                                                                       |                               |
| 40 |                  |                                                                                                                                                                                                       |                               |
| 41 |                  |                                                                                                                                                                                                       |                               |
| 42 |                  |                                                                                                                                                                                                       |                               |
| 43 |                  |                                                                                                                                                                                                       |                               |
| 44 |                  |                                                                                                                                                                                                       |                               |
| 45 |                  |                                                                                                                                                                                                       |                               |
| 46 |                  |                                                                                                                                                                                                       |                               |
| 47 |                  |                                                                                                                                                                                                       |                               |
| 48 |                  |                                                                                                                                                                                                       |                               |
| 49 |                  |                                                                                                                                                                                                       |                               |
| 50 |                  |                                                                                                                                                                                                       |                               |
| 51 |                  |                                                                                                                                                                                                       |                               |
| 52 |                  |                                                                                                                                                                                                       |                               |
| 53 |                  |                                                                                                                                                                                                       |                               |
| 54 |                  |                                                                                                                                                                                                       |                               |
| 55 |                  |                                                                                                                                                                                                       |                               |
| 56 |                  |                                                                                                                                                                                                       |                               |
| 57 |                  |                                                                                                                                                                                                       |                               |
| 58 |                  |                                                                                                                                                                                                       |                               |
| 59 |                  |                                                                                                                                                                                                       |                               |
| 60 |                  |                                                                                                                                                                                                       |                               |

|                                                 |                          |    |                                                                                                                                                                                                                                                                                                                                                                                                                       |                            |
|-------------------------------------------------|--------------------------|----|-----------------------------------------------------------------------------------------------------------------------------------------------------------------------------------------------------------------------------------------------------------------------------------------------------------------------------------------------------------------------------------------------------------------------|----------------------------|
| 1<br>2<br>3<br>4<br>5<br>6<br>7<br>8<br>9<br>10 | Main results             | 16 | (a) Give unadjusted estimates and, if applicable, confounder-adjusted estimates and their precision (eg, 95% confidence interval). Make clear which confounders were adjusted for and why they were included<br><br>(b) Report category boundaries when continuous variables were categorized<br><br>(c) If relevant, consider translating estimates of relative risk into absolute risk for a meaningful time period | 10-11, Table 3, table 4    |
| 11<br>12<br>13<br>14                            | Other analyses           | 17 | Report other analyses done—eg analyses of subgroups and interactions, and sensitivity analyses                                                                                                                                                                                                                                                                                                                        | 8, Supplementary Table 1-4 |
| 15<br>16                                        | <b>Discussion</b>        |    |                                                                                                                                                                                                                                                                                                                                                                                                                       |                            |
| 17<br>18                                        | Key results              | 18 | Summarise key results with reference to study objectives                                                                                                                                                                                                                                                                                                                                                              | 13                         |
| 19<br>20<br>21<br>22                            | Limitations              | 19 | Discuss limitations of the study, taking into account sources of potential bias or imprecision. Discuss both direction and magnitude of any potential bias                                                                                                                                                                                                                                                            | 13,14                      |
| 23<br>24<br>25<br>26                            | Interpretation           | 20 | Give a cautious overall interpretation of results considering objectives, limitations, multiplicity of analyses, results from similar studies, and other relevant evidence                                                                                                                                                                                                                                            | 13,16                      |
| 27<br>28<br>29                                  | Generalisability         | 21 | Discuss the generalisability (external validity) of the study results                                                                                                                                                                                                                                                                                                                                                 | 15                         |
| 30<br>31                                        | <b>Other information</b> |    |                                                                                                                                                                                                                                                                                                                                                                                                                       |                            |
| 32<br>33<br>34<br>35                            | Funding                  | 22 | Give the source of funding and the role of the funders for the present study and, if applicable, for the original study on which the present article is based                                                                                                                                                                                                                                                         |                            |

\*Give information separately for exposed and unexposed groups.

**Note:** An Explanation and Elaboration article discusses each checklist item and gives methodological background and published examples of transparent reporting. The STROBE checklist is best used in conjunction with this article (freely available on the Web sites of PLoS Medicine at <http://www.plosmedicine.org/>, Annals of Internal Medicine at <http://www.annals.org/>, and Epidemiology at <http://www.epidem.com/>). Information on the STROBE Initiative is available at <http://www.strobe-statement.org>.

# BMJ Open

## Sociodemographic and lifestyle predictors of incident hospital admissions with multimorbidity in a general population 1999–2019: the EPIC-Norfolk cohort

|                                 |                                                                                                                                                                                                                                                                                                                                                                                                                                                                                                                                                         |
|---------------------------------|---------------------------------------------------------------------------------------------------------------------------------------------------------------------------------------------------------------------------------------------------------------------------------------------------------------------------------------------------------------------------------------------------------------------------------------------------------------------------------------------------------------------------------------------------------|
| Journal:                        | <i>BMJ Open</i>                                                                                                                                                                                                                                                                                                                                                                                                                                                                                                                                         |
| Manuscript ID                   | bmjopen-2020-042115.R1                                                                                                                                                                                                                                                                                                                                                                                                                                                                                                                                  |
| Article Type:                   | Original research                                                                                                                                                                                                                                                                                                                                                                                                                                                                                                                                       |
| Date Submitted by the Author:   | 04-Aug-2020                                                                                                                                                                                                                                                                                                                                                                                                                                                                                                                                             |
| Complete List of Authors:       | Luben, Robert; University of Cambridge School of Clinical Medicine, Department of Public Health and Primary Care<br>Hayat, Shabina; University of Cambridge School of Clinical Medicine, Department of Public Health and Primary Care<br>Wareham, Nicholas; University of Cambridge School of Clinical Medicine, MRC Epidemiology Unit<br>Pharoah, Paul; University of Cambridge School of Clinical Medicine, Department of Public Health and Primary Care<br>Khaw, Kay-Tee; University of Cambridge School of Clinical Medicine, MRC Epidemiology Unit |
| <b>Primary Subject Heading</b>: | Epidemiology                                                                                                                                                                                                                                                                                                                                                                                                                                                                                                                                            |
| Secondary Subject Heading:      | Health services research, Health policy                                                                                                                                                                                                                                                                                                                                                                                                                                                                                                                 |
| Keywords:                       | EPIDEMIOLOGY, Health policy < HEALTH SERVICES ADMINISTRATION & MANAGEMENT, SOCIAL MEDICINE                                                                                                                                                                                                                                                                                                                                                                                                                                                              |
|                                 |                                                                                                                                                                                                                                                                                                                                                                                                                                                                                                                                                         |

SCHOLARONE™  
Manuscripts



I, the Submitting Author has the right to grant and does grant on behalf of all authors of the Work (as defined in the below author licence), an exclusive licence and/or a non-exclusive licence for contributions from authors who are: i) UK Crown employees; ii) where BMJ has agreed a CC-BY licence shall apply, and/or iii) in accordance with the terms applicable for US Federal Government officers or employees acting as part of their official duties; on a worldwide, perpetual, irrevocable, royalty-free basis to BMJ Publishing Group Ltd ("BMJ") its licensees and where the relevant Journal is co-owned by BMJ to the co-owners of the Journal, to publish the Work in this journal and any other BMJ products and to exploit all rights, as set out in our [licence](#).

The Submitting Author accepts and understands that any supply made under these terms is made by BMJ to the Submitting Author unless you are acting as an employee on behalf of your employer or a postgraduate student of an affiliated institution which is paying any applicable article publishing charge ("APC") for Open Access articles. Where the Submitting Author wishes to make the Work available on an Open Access basis (and intends to pay the relevant APC), the terms of reuse of such Open Access shall be governed by a Creative Commons licence – details of these licences and which [Creative Commons](#) licence will apply to this Work are set out in our licence referred to above.

Other than as permitted in any relevant BMJ Author's Self Archiving Policies, I confirm this Work has not been accepted for publication elsewhere, is not being considered for publication elsewhere and does not duplicate material already published. I confirm all authors consent to publication of this Work and authorise the granting of this licence.

# Sociodemographic and lifestyle predictors of incident hospital admissions with multimorbidity in a general population 1999–2019: the EPIC-Norfolk cohort

Robert Luben<sup>1</sup>, Shabina Hayat<sup>1</sup>, Nicholas Wareham<sup>2</sup>, Paul Pharoah<sup>1</sup>, Kay-Tee Khaw<sup>1</sup>

*1 Department of Public Health and Primary Care, Institute of Public Health, University of Cambridge, Cambridge, United Kingdom*

*2 MRC Epidemiology Unit, University of Cambridge School of Clinical Medicine, Cambridge United Kingdom*

*Correspondence to: Robert Luben, Department of Public Health and Primary Care, Strangeways Research Laboratory, Worts Causeway, Cambridge, UK. Email: [robert.luben@phpc.cam.ac.uk](mailto:robert.luben@phpc.cam.ac.uk) Telephone: +44 (0)1223 748691*

July 29, 2020

For peer review only

## Abstract

### Background

The ageing population and prevalence of long-term disorders with multimorbidity is a major health challenge worldwide. The associations between comorbid conditions and mortality risk are well established; however, few prospective community-based studies have reported on prior risk factors for incident hospital admissions with multimorbidity. We aimed to explore the independent associations for a range of demographic, lifestyle and physiological determinants and the likelihood of subsequent hospital incident multimorbidity.

### Methods

We examined incident hospital admissions with multimorbidity in 25014 men and women aged 40–79 in a British prospective population-based study recruited 1993–1997 and followed-up until 2019. The determinants of incident multimorbidity, defined as Charlson Comorbidity Index  $\geq 3$ , were investigated using multivariable logistic regression models for the 10-year period 1999–2009 and repeated with independent measurements in a second 10-year period 2009–2019.

### Results

Between 1999–2009 18179 participants (73% of the population) had a hospital admission. Baseline 5-year and 10-year incident multimorbidity were observed in 6% and 12% of participants respectively. Age per 10-year increase OR 2.19 (95%CI 2.06–2.33) and male sex OR 1.32 (95%CI 1.19–1.47) predicted incident multimorbidity over 10 years. In the subset free of the most serious diseases at baseline, current smoking OR 1.74 (95%CI 1.52–2.00), BMI  $>30$  kg/m<sup>2</sup> OR 1.40 (95%CI 1.24–1.58) and physical inactivity OR 1.14 (95%CI 1.04–1.26) were positively associated and plasma vitamin C (a biomarker of plant food intake) per SD increase OR 0.85 (95%CI 0.81–0.89) inversely associated with incident 10-year multimorbidity after multivariable adjustment for age, sex, social class, education, alcohol consumption, systolic blood pressure and cholesterol. Results were similar when re-examined for a further time period 2009–2019.

### Conclusion

Age, male sex and potentially modifiable lifestyle behaviours including smoking, body mass index, physical inactivity and low fruit and vegetable intake were associated with increased risk of future incident hospital admissions with multimorbidity.

**Article summary**

## Strengths and limitations of this study

- We examined future hospital admission with multimorbidity using a prospective design and a community-based population.
- The relationship between demographic, lifestyle and physiological factors and subsequent multimorbidity was documented.
- Measurements were made at two time-points: in mainly middle-aged participants 40–79 years and mainly old-aged participants of 48–92 years.
- Participants were followed-up over 20 years allowing several time periods to be examined.
- Restricting the definition of multimorbidity to a subset of chronic conditions means some conditions will not be counted.

For peer review only



**Acknowledgements:** The authors would like to thank the participants, general practitioners, and staff of EPIC-Norfolk.

1 **Contributors:** KTK, NW, SH and RL were involved in the conception and design of the study. RL drafted the manuscript, with support  
2 from KTK and PP. SH contributed to data interpretation. RL was responsible for external data linkage. SH and RL contributed to data  
3 collection and acquisition. All authors read and critically revised the manuscript and approved the final manuscript. RL is the guarantor.  
4 The corresponding author attests that all listed authors meet authorship criteria and that no others meeting the criteria have been  
5 omitted.

6 **Funding:** The design and conduct of the EPIC-Norfolk study and collection and management of the data was supported by programme  
7 grants from the Medical Research Council UK (G9502233, G0401527) and Cancer Research UK (C864/A8257, C864/A2883).  
8

9 **Competing interests:** All authors have completed the ICMJE uniform disclosure form at [www.icmje.org/coi\\_disclosure.pdf](http://www.icmje.org/coi_disclosure.pdf) and report:  
10 RL, SH, KTK and NW report grants from MRC and CRUK during the conduct of the study; The sponsors had no role in any of the following:  
11 study design, data collection, data analysis, interpretation of data, writing of the article, decision to submit it for publication. All authors  
12 are independent of funders and sponsors and had access to all the data. No conflicts of interest were declared by any author (apart from  
13 the two grants) and they have no other relationships or activities that could appear to have influenced the submitted work.

14 **Ethical approval:** The work was approved by the East Norfolk and Waveney NHS research governance committee (2005EC07L) and the  
15 Norfolk research ethics committee (05/Q0101/191). All participants gave informed signed consent for study participation including  
16 access to medical records.

17 **Data sharing:** The authors will make the dataset available under a Data Transfer Agreement to any bona fide researcher who wishes to  
18 obtain the dataset in order to undertake a replication analysis. Although the dataset is anonymised, the breadth of the data included and  
19 the multiplicity of variables that are included in this analysis file as primary variables or confounding factors, means that provision of  
20 the dataset to other researchers without a Data Transfer Agreement would constitute a risk. Requests for data sharing/access should be  
21 submitted to the EPIC Management Committee ([epic-norfolk@mrc-epid.cam.ac.uk](mailto:epic-norfolk@mrc-epid.cam.ac.uk))  
22

23 **Transparency:** The lead author (the manuscript's guarantor) affirms that the manuscript is an honest, accurate, and transparent  
24 account of the study being reported; that no important aspects of the study have been omitted; and that any discrepancies from the  
25 study as planned (and, if relevant, registered) have been explained.

26 **Open access:** This is an Open Access article distributed in accordance with the terms of the Creative Commons Attribution (CC BY 4.0)  
27 license, which permits others to distribute, remix, adapt and build upon this work, for commercial use, provided the original work is  
28 properly cited. See: <http://creativecommons.org/licenses/by/4.0/>  
29

30 **Patient and public involvement:** The EPIC-Norfolk Study have an active Participants Advisory Panel which meets quarterly to advise  
31 on research protocols, suggest ideas and provide feedback on the research including proposed new studies and collaborations. All  
32 participants of the EPIC-Norfolk study are informed about the study through regular newsletters as well as public meetings. Information  
33 is also disseminated through local community talks in the Norfolk area and science festivals.

34 **Exclusive licence:** The Corresponding Author has the right to grant on behalf of all authors and does grant on behalf of all authors, a  
35 worldwide licence to the Publishers and its licensees in perpetuity, in all forms, formats and media (whether known now or created in the  
36 future), to i) publish, reproduce, distribute, display and store the Contribution, ii) translate the Contribution into other languages, create  
37 adaptations, reprints, include within collections and create summaries, extracts and/or, abstracts of the Contribution, iii) create any  
38 other derivative work(s) based on the Contribution, iv) to exploit all subsidiary rights in the Contribution, v) the inclusion of electronic  
39 links from the Contribution to third party material where-ever it may be located; and, vi) licence any third party to do any or all of the  
40 above.  
41  
42  
43  
44  
45  
46  
47  
48  
49  
50  
51  
52  
53  
54  
55  
56  
57  
58  
59  
60

## Introduction

1  
2 The Academy of Medical Sciences 2018 report highlighted multimorbidity as a global priority for research.  
3  
4 Patients with multimorbidity experience reduced wellbeing and quality of life and account for a  
5  
6 disproportionately high share of healthcare workload and costs. Management of the rising prevalence of  
7  
8 long-term disorders is the main challenge facing health-care systems worldwide. [1–3]

9  
10 Multimorbidity is commonly defined as the presence of multiple diseases or conditions with a cut-off of two  
11  
12 or more conditions [4], however there is no agreed definition or classification system, which makes the  
13  
14 existing evidence base difficult to interpret. [1] The term comorbidity predates multimorbidity and was used  
15  
16 to predict the effect of additional diseases for those with an index disease of interest. [5–7] The Charlson  
17  
18 Comorbidity Index (CCI) [8] was originally created to predict mortality in hospital patients after one year  
19  
20 and is defined using a set of 17 chronic diseases, weighted according to the risk of death. The index has been  
21  
22 widely used with several authors suggesting extensions or modifications to the original definition [9–14]  
23  
24 and it remains a common standard to which other systems are often compared. [15]

25  
26 The associations between comorbid conditions and mortality are well established. [16–20] However, few  
27  
28 studies have examined the determinants of incident multimorbidity rather than its consequences [21–26]  
29  
30 since most lack detailed demographic, socioeconomic and physiological measurements in population-based  
31  
32 men and women prior to the onset of multimorbid disease with subsequent follow-up. Retrospective  
33  
34 hospital-based studies examining multimorbidity lack community-based denominators while general  
35  
36 practice-based studies are often cross-sectional or examine mortality in already multimorbid patients. Few  
37  
38 studies examine factors that predict the likelihood of multimorbidity rather than factors that predict risk of  
39  
40 individual component conditions. The large majority of studies conducted to date are cross-sectional, with  
41  
42 few prospective community-based studies able to examine incident multimorbidity from subsequent  
43  
44 hospitalisation. [1,24,25] In this study, we examine the independent associations for a range of demographic,  
45  
46 lifestyle and physiological determinants and the likelihood of subsequent hospital incident multimorbidity.  
47  
48 We use the CCI over 5-year and 10-year time periods and re-examine these associations independently in a  
49  
50 subset 12 years after baseline since health care policy and the criteria used for admission may have changed  
51  
52 over time. We have previously reported on risk factors for hospitalisation [27–29] but here we explore in  
53  
54 more detail hospital admissions with multimorbidity, a measure of both health service and individual  
55  
56 burden.

## Methods

57  
58 We used data from the European Prospective Investigation into Cancer in Norfolk cohort (EPIC-Norfolk) .  
59  
60 [30,31] 25639 men and women aged 40–79 were recruited from general practices in Norfolk, completed a  
lifestyle questionnaire and attended a baseline health check from 1993 to 1997. Participants were  
reapproached approximately 12 years later, aged 48–92 with 9814 completing a second questionnaire and  
8049 attending a health check at time-point two (TP2). Figure 1 shows a flow diagram of participant  
numbers at various stages. The cohort was followed-up until 2019 with annual record linkage to hospital  
episode data. Since linkage was to national databases and migration of cohort participants was rare, there  
was almost no loss to follow-up.

1 The Charlson Comorbidity Index (CCI) is defined using a set of chronic diseases, each having an associated  
2 weight (1, 2, 3 or 6) related to the risk of death. The conditions are myocardial infarction, congestive heart  
3 failure, peripheral vascular disease, cerebrovascular disease, dementia, chronic pulmonary disease,  
4 rheumatoid disease, peptic ulcer disease, liver disease, diabetes, hemiplegia or paraplegia, renal disease,  
5 cancer and AIDS/HIV. Two levels of severity are defined for liver disease, diabetes and cancer (details are  
6 shown in supplementary table S1). All comorbidities are assigned a weight of 1 except  
7 hemiplegia/paraplegia, renal disease, and malignancies (weight=2); moderate/severe liver disease  
8 (weight=3); metastatic solid tumour and AIDS/HIV (weight=6). For diseases with two levels of severity  
9 (liver disease, diabetes and cancer), the less severe version is assigned weight=0 if the more severe version  
10 is also present in a patient. The CCI diseases were assigned diagnosis codes using the International  
11 Classification of Diseases (ICD-10) which was used to link the CCI to hospital episode statistics (HES) records  
12 and to cohort participants. The weighted individual disease scores were totalled to create an overall score  
13 with a maximum value of 29. [8,12] CCI was measured for various outcome periods restricted to all hospital  
14 events within the given time period: at baseline, 5-year (1999–2004) and 10-year (1999–2009) CCI and at  
15 TP2, 5-year (2009–2014) and 10-year (2009–2019) CCI. Multiple admissions including the same CCI  
16 category were only counted once.

17  
18  
19  
20  
21  
22  
23  
24  
25  
26 Participants attending the baseline and TP2 health examinations had their height to the nearest 0.1 cm  
27 measured using a stadiometer (Chasemores, UK) and their weight to the nearest 100g measured in light  
28 clothing without shoes (Salter, West Bromwich, UK). Body mass index (BMI) was calculated using measured  
29 weight in kilograms divided by the square of measured height in square metres. Trained nurses obtained  
30 non-fasting blood samples by venepuncture into plain and citrate bottles. Bloods were assayed at the  
31 Department of Clinical Biochemistry, University of Cambridge, UK. Serum concentrations of total cholesterol  
32 were measured with the RA 1000 Technicon analyser (Bayer Diagnostics, Basingstoke). Plasma was  
33 stabilised in a standardised volume of metaphosphoric acid stored at -70 °C and vitamin C concentrations  
34 measured using a fluorometric assay within one week. [32] Systolic blood pressure was measured using an  
35 Accutorr Sphygmomanometer (Datascope Medical, Huntington, United Kingdom). Participants sat for three  
36 minutes before two measurements were taken with the arm horizontal and held at mid-sternum level.  
37 Systolic blood pressure was defined as the average of the two measurements.

38  
39  
40  
41  
42  
43  
44  
45  
46 At baseline and again at TP2, participants completed a lifestyle questionnaire. Two yes/no questions were  
47 used to derive smoking status: “Have you ever smoked as much as one cigarette a day for as long as a year?”  
48 and, where a positive response was given, “Do you smoke cigarettes now?” Participants also completed  
49 questions about their employment and that of their partner with details of both current and past  
50 employment recorded. Occupational social class was defined according to the Registrar General’s  
51 classification. [33,34] A list of common UK qualifications was used to establish educational attainment and  
52 participants were asked to mark all relevant qualifications. These were then categorised using the highest  
53 qualification attained. Participants were asked about their occupational and leisure physical activity. A  
54 combined score was created combining leisure and occupational elements and divided into four ordered  
55 categories with those who did not complete the question placed in the inactive category. The score was  
56 validated against energy expenditure measured by free-living heart rate monitoring with individual  
57  
58  
59  
60

1 calibration. [35,36] Participants were asked “Are you a non-drinker/teetotaler now?” and “At present, about  
2 how many alcoholic drinks do you have each week” for various types of alcohol. Current units were  
3 calculated from the questionnaire responses with one unit equal to a half pint of beer, one glass of wine or  
4 fortified wine or a single measure of spirits. Prevalent disease was established from the question “Has the  
5 doctor ever told you that you have any of the following?” followed by a list of common conditions including  
6 “Heart attack (myocardial infarction)”, “Stroke”, “Cancer” and “Diabetes”.  
7  
8  
9

## 10 **Statistical methods**

11  
12 Associations were examined both including and excluding chronic disease at baseline and repeated with  
13 independent measurements at TP2 in a subset of participants using a second baseline 12 years  
14 approximately after the first. The baseline analysis excludes 625 men and women who died before 1999  
15 while at TP2 a further 126 participants who died prior to 2009 were excluded. Dichotomous variables were  
16 created for the social class (manual and non-manual), educational attainment (high and low) at baseline and  
17 body mass index ( $>30$  and  $\leq 30$  kg/m<sup>2</sup>) and usual physical activity (active and inactive) at both baseline and  
18 TP2. For social class, professional, managerial and technical and non-manual skilled occupations were  
19 classed as non-manual while manual skilled, partly skilled and unskilled were classed as manual. For  
20 educational attainment, those with qualifications at secondary level or above were classed as high and  
21 those with no qualification as low. Hospital outcomes were categorised into five groups, “No hospital  
22 admissions”, CCI=0, CCI=1, CCI=2 and CCI  $\geq 3$  and hospital admissions with multimorbidity (incident  
23 multimorbidity) defined as CCI  $\geq 3$ . Multivariable logistic regression was used for all models and compared  
24 multimorbid participants (CCI  $\geq 3$ ) with those having CCI  $\leq 2$  or no hospital admissions. A sensitivity analysis,  
25 using identical models to those in the primary analyses for the period 1999–2009, but excluding 80  
26 participants defined as multimorbid having only one condition with a CCI weighting  $\geq 3$ , gave virtually  
27 identical results (results not shown).  
28  
29  
30  
31  
32  
33  
34  
35  
36  
37  
38

39 The numbers of individuals with missing values for covariables at baseline were: 53 BMI, 218 smoking  
40 status, 545 social class, 18 education level. The physical activity score has no missing values since those with  
41 missing data were classified as being inactive. Multiple imputation was used to estimate missing values at  
42 TP2 most apparent when participants completed questionnaires but did not attend a health examination  
43 n=1891. Predictive mean matching with 5 multiple imputations and 50 iterations was used with baseline  
44 and TP2 variables. All analyses were performed using the R statistical language (R Foundation for Statistical  
45 Computing, Vienna, Austria V3.5.3 with packages knitr, Gmisc, ggplot2, tidyverse, intubate, mice.) CCIs were  
46 calculated using the R package “comorbidity”. [37]  
47  
48  
49  
50  
51  
52

## 53 **Results**

54  
55 Table 1 shows future 5-year and 10-year Charlson Comorbidity Index hospital admission rates from baseline  
56 for n=25014 and from time-point two (TP2) for n=9814 according to demographic characteristics in the  
57 study population. Between 1999–2009 18179 participants (73% of the population) had a hospital  
58 admission. Baseline 5-year and 10-year incident multimorbidity (CCI  $\geq 3$ ) were observed in 6% and 12% of  
59 participants respectively. Figure 2 shows 10-year multimorbidity rates by age group and sex. More men had  
60 CCI  $\geq 3$  than women and those aged  $>75$  years had the highest proportion of admissions with multimorbid

conditions with 14.5% at 5 years and 28.8% at 10 years. Multimorbidity rates at TP2 were slightly higher than baseline with 5-year and 10-year incident CCI  $\geq 3$  observed in 10% and 20% of participants respectively and the highest proportion in those >75 years.

**Table 1 | Charlson Comorbidity Index hospital admission rates by age-group and sex in men and women aged 40–79, 1999–2019**

|                                                                  | Total | No admissions | CCI=0       | CCI=1       | CCI=2      | CCI $\geq 3$ |
|------------------------------------------------------------------|-------|---------------|-------------|-------------|------------|--------------|
| <b>Baseline 5-year follow-up period, 1999–2004 (n(%))</b>        |       |               |             |             |            |              |
| Men                                                              | 11228 | 5457 (48.6)   | 3340 (29.7) | 988 (8.8)   | 662 (5.9)  | 781 (7.0)    |
| Women                                                            | 13786 | 7153 (51.9)   | 4398 (31.9) | 953 (6.9)   | 643 (4.7)  | 639 (4.6)    |
| $\leq 55$ years                                                  | 9567  | 6009 (62.8)   | 2720 (28.4) | 411 (4.3)   | 236 (2.5)  | 191 (2.0)    |
| (55–65] years                                                    | 7805  | 3940 (50.5)   | 2479 (31.8) | 583 (7.5)   | 408 (5.2)  | 395 (5.1)    |
| (65–75] years                                                    | 6933  | 2489 (35.9)   | 2322 (33.5) | 830 (12.0)  | 561 (8.1)  | 731 (10.5)   |
| >75 years                                                        | 709   | 172 (24.3)    | 217 (30.6)  | 117 (16.5)  | 100 (14.1) | 103 (14.5)   |
| <b>Baseline 10-year follow-up period, 1999–2009 (n(%))</b>       |       |               |             |             |            |              |
| Men                                                              | 11228 | 2928 (26.1)   | 4151 (37.0) | 1434 (12.8) | 1056 (9.4) | 1659 (14.8)  |
| Women                                                            | 13786 | 3907 (28.3)   | 5767 (41.8) | 1601 (11.6) | 1137 (8.2) | 1374 (10.0)  |
| $\leq 55$ years                                                  | 9567  | 3720 (38.9)   | 4201 (43.9) | 746 (7.8)   | 476 (5.0)  | 424 (4.4)    |
| (55–65] years                                                    | 7805  | 1973 (25.3)   | 3259 (41.8) | 994 (12.7)  | 711 (9.1)  | 868 (11.1)   |
| (65–75] years                                                    | 6933  | 1059 (15.3)   | 2294 (33.1) | 1168 (16.8) | 875 (12.6) | 1537 (22.2)  |
| >75 years                                                        | 709   | 83 (11.7)     | 164 (23.1)  | 127 (17.9)  | 131 (18.5) | 204 (28.8)   |
| <b>Time-point two 5-year follow-up period, 2009–2014 (n(%))</b>  |       |               |             |             |            |              |
| Men                                                              | 4252  | 1428 (33.6)   | 1355 (31.9) | 522 (12.3)  | 389 (9.1)  | 558 (13.1)   |
| Women                                                            | 5562  | 2234 (40.2)   | 1793 (32.2) | 686 (12.3)  | 403 (7.2)  | 446 (8.0)    |
| $\leq 55$ years                                                  | 342   | 215 (62.9)    | 92 (26.9)   | 19 (5.6)    | 10 (2.9)   | 6 (1.8)      |
| (55–65] years                                                    | 3090  | 1540 (49.8)   | 1006 (32.6) | 277 (9.0)   | 143 (4.6)  | 124 (4.0)    |
| (65–75] years                                                    | 3695  | 1303 (35.3)   | 1301 (35.2) | 464 (12.6)  | 286 (7.7)  | 341 (9.2)    |
| >75 years                                                        | 2687  | 604 (22.5)    | 749 (27.9)  | 448 (16.7)  | 353 (13.1) | 533 (19.8)   |
| <b>Time-point two 10-year follow-up period, 2009–2019 (n(%))</b> |       |               |             |             |            |              |
| Men                                                              | 4252  | 695 (16.3)    | 1294 (30.4) | 631 (14.8)  | 558 (13.1) | 1074 (25.3)  |
| Women                                                            | 5562  | 1166 (21.0)   | 1956 (35.2) | 914 (16.4)  | 618 (11.1) | 908 (16.3)   |
| $\leq 55$ years                                                  | 342   | 154 (45.0)    | 122 (35.7)  | 37 (10.8)   | 14 (4.1)   | 15 (4.4)     |
| (55–65] years                                                    | 3090  | 905 (29.3)    | 1241 (40.2) | 407 (13.2)  | 267 (8.6)  | 270 (8.7)    |
| (65–75] years                                                    | 3695  | 589 (15.9)    | 1309 (35.4) | 611 (16.5)  | 473 (12.8) | 713 (19.3)   |
| >75 years                                                        | 2687  | 213 (7.9)     | 578 (21.5)  | 490 (18.2)  | 422 (15.7) | 984 (36.6)   |

Descriptive characteristics of the cohort according to 10-year CCI are shown in table 2. Participants with higher number of total admissions and longer duration of hospital stay had higher CCI, with mean duration 58 days and 13 admissions for participants with CCI  $\geq 3$  during the 10-year period. Participants with multimorbidity admissions were more likely at baseline examination to be current smokers, less physically active, have higher body mass index (BMI) and have lower plasma vitamin C (a proxy for a diet rich in fruit and vegetables) and report various prevalent conditions.



**Table 2 | Descriptive characteristics at baseline in 25014 men and women aged 40–79 by 10-year Charlson Comorbidity Index, 1999–2009**

|                                               | Total       | No admissions | CCI=0       | CCI=1       | CCI=2       | CCI≥3       |
|-----------------------------------------------|-------------|---------------|-------------|-------------|-------------|-------------|
| <b>Hospital duration 1999–2009, days</b>      |             |               |             |             |             |             |
| Mean ±SD                                      | 16.3 ±46.5  | 0.0 ±0.0      | 9.1 ±28.3   | 24.9 ±71.5  | 30.4 ±43.0  | 57.8 ±77.5  |
| <b>Total hospital admissions 1999–2009</b>    |             |               |             |             |             |             |
| Mean ±SD                                      | 3.8 ±16.2   | 0.0 ±0.0      | 2.8 ±3.1    | 4.5 ±6.0    | 6.4 ±8.3    | 13.4 ±43.9  |
| <b>Age, years</b>                             |             |               |             |             |             |             |
| Mean ±SD                                      | 59.0 ±9.3   | 55.4 ±8.6     | 57.9 ±8.8   | 62.0 ±8.8   | 62.9 ±8.8   | 65.0 ±8.0   |
| <b>Body mass index, kg/m<sup>2</sup></b>      |             |               |             |             |             |             |
| Mean ±SD                                      | 26.4 ±3.9   | 25.9 ±3.7     | 26.2 ±3.8   | 26.8 ±4.1   | 26.8 ±4.3   | 27.3 ±4.2   |
| <b>Cigarette smoking (n (%))</b>              |             |               |             |             |             |             |
| Current                                       | 2904        | 751 (25.9)    | 1008 (34.7) | 410 (14.1)  | 291 (10.0)  | 444 (15.3)  |
| Former                                        | 10423       | 2558 (24.5)   | 4007 (38.4) | 1352 (13.0) | 979 (9.4)   | 1527 (14.7) |
| Never                                         | 11469       | 3476 (30.3)   | 4821 (42.0) | 1245 (10.9) | 903 (7.9)   | 1024 (8.9)  |
| <b>Social class dichotomised (n (%))</b>      |             |               |             |             |             |             |
| Non-manual                                    | 14717       | 4400 (29.9)   | 5707 (38.8) | 1733 (11.8) | 1256 (8.5)  | 1621 (11.0) |
| Manual                                        | 9752        | 2304 (23.6)   | 4029 (41.3) | 1214 (12.4) | 886 (9.1)   | 1319 (13.5) |
| <b>Level of education (n (%))</b>             |             |               |             |             |             |             |
| Higher level                                  | 15866       | 4922 (31.0)   | 6333 (39.9) | 1724 (10.9) | 1277 (8.0)  | 1610 (10.1) |
| Lower level                                   | 9130        | 1910 (20.9)   | 3576 (39.2) | 1310 (14.3) | 916 (10.0)  | 1418 (15.5) |
| <b>Simple physical activity index (n (%))</b> |             |               |             |             |             |             |
| Inactive                                      | 7559        | 1681 (22.2)   | 2666 (35.3) | 1116 (14.8) | 788 (10.4)  | 1308 (17.3) |
| Moderately inactive                           | 7187        | 2084 (29.0)   | 2904 (40.4) | 819 (11.4)  | 610 (8.5)   | 770 (10.7)  |
| Moderately active                             | 5688        | 1708 (30.0)   | 2353 (41.4) | 608 (10.7)  | 470 (8.3)   | 549 (9.7)   |
| Active                                        | 4580        | 1362 (29.7)   | 1995 (43.6) | 492 (10.7)  | 325 (7.1)   | 406 (8.9)   |
| <b>Alcohol intake, units per week</b>         |             |               |             |             |             |             |
| Mean ±SD                                      | 7.1 ±9.5    | 7.7 ±9.6      | 6.9 ±9.1    | 6.9 ±9.5    | 6.7 ±9.8    | 6.8 ±10.3   |
| <b>Plasma vitamin C, µmol/L</b>               |             |               |             |             |             |             |
| Mean ±SD                                      | 53.5 ±20.3  | 55.3 ±19.8    | 55.4 ±19.9  | 50.5 ±20.3  | 51.3 ±20.9  | 47.6 ±20.6  |
| <b>Systolic blood pressure, mmHg</b>          |             |               |             |             |             |             |
| Mean ±SD                                      | 135.3 ±18.3 | 132.4 ±17.4   | 133.5 ±17.5 | 138.7 ±18.7 | 138.6 ±19.2 | 142.2 ±19.3 |
| <b>Total cholesterol, mmol/L</b>              |             |               |             |             |             |             |
| Mean ±SD                                      | 6.2 ±1.2    | 6.1 ±1.1      | 6.1 ±1.1    | 6.3 ±1.2    | 6.2 ±1.2    | 6.3 ±1.2    |
| <b>Prevalent heart attack (n (%))</b>         |             |               |             |             |             |             |
| No reported heart attack                      | 24253       | 6745 (27.8)   | 9764 (40.3) | 2886 (11.9) | 2097 (8.6)  | 2761 (11.4) |
| Self-reported heart attack                    | 728         | 85 (11.7)     | 143 (19.6)  | 146 (20.1)  | 94 (12.9)   | 260 (35.7)  |
| <b>Prevalent stroke (n (%))</b>               |             |               |             |             |             |             |
| No reported stroke                            | 24660       | 6786 (27.5)   | 9821 (39.8) | 2975 (12.1) | 2151 (8.7)  | 2927 (11.9) |
| Self-reported stroke                          | 329         | 45 (13.7)     | 87 (26.4)   | 57 (17.3)   | 41 (12.5)   | 99 (30.1)   |
| <b>Prevalent cancer (n (%))</b>               |             |               |             |             |             |             |
| No reported cancer                            | 23688       | 6595 (27.8)   | 9449 (39.9) | 2878 (12.1) | 2031 (8.6)  | 2735 (11.5) |
| Self-reported cancer                          | 1301        | 237 (18.2)    | 459 (35.3)  | 155 (11.9)  | 162 (12.5)  | 288 (22.1)  |
| <b>Prevalent diabetes (n (%))</b>             |             |               |             |             |             |             |
| No reported diabetes                          | 24442       | 6760 (27.7)   | 9844 (40.3) | 2941 (12.0) | 2111 (8.6)  | 2786 (11.4) |
| Self-reported diabetes                        | 541         | 71 (13.1)     | 61 (11.3)   | 90 (16.6)   | 81 (15.0)   | 238 (44.0)  |

In table 3, odds ratios are shown for 5-year and 10-year incident multimorbidity, defined as those with CCI  $\geq 3$ , compared with CCI  $\leq 2$  or no hospital admission, adjusted age, sex, occupational social class and educational attainment in model 1. Model 2 additionally adjusts for prevalent diseases, cardiovascular disease (CVD), cancer and diabetes; model 3 adds lifestyle factors, current smoking, alcohol units per week, usual physical activity as well as BMI  $>30$  kg/m<sup>2</sup> and plasma vitamin C; model 4 adds systolic blood pressure and cholesterol. Age, sex and prevalent diseases were strongly associated with multimorbidity admissions in all models. The fully adjusted association of 10-year incident multimorbidity with age per 10 years increase was OR 2.19 (95% CI 2.06–2.33), for sex OR 1.32 (95% CI 1.19–1.47), for prevalent CVD OR 2.22 (95% CI 1.87–2.62), cancer OR 2.05 (95% CI 1.73–2.42) and diabetes OR 3.41 (95% CI 2.74–4.24). The risk of multimorbidity in participants with CVD at baseline is equivalent to the risk in those without CVD 10 years older. Similarly, in participants with baseline diabetes and baseline cancer, the risk equivalent to those

without disease is 17 and 11 years older respectively.

1  
2  
3  
4  
5  
6  
7  
8  
9  
10  
11  
12  
13  
14  
15  
16  
17  
18  
19  
20  
21  
22  
23  
24  
25  
26  
27  
28  
29  
30  
31  
32  
33  
34  
35  
36  
37  
38  
39  
40  
41  
42  
43  
44  
45  
46  
47  
48  
49  
50  
51  
52  
53  
54  
55  
56  
57  
58  
59  
60

For peer review only

**Table 3 | Multivariable logistic regression of risk factors for 5-year and 10-year hospital admissions with multimorbidity in 25014 men and women**

|                                | 5-year multimorbidity †, 1999–2004<br>OR (95% CI) | p value | 10-year multimorbidity †, 1999–2009<br>OR (95% CI) | p value |
|--------------------------------|---------------------------------------------------|---------|----------------------------------------------------|---------|
| <b>Model 1</b>                 |                                                   |         |                                                    |         |
| Male sex                       | 1.49 (1.34–1.67)                                  | < 0.001 | 1.56 (1.44–1.69)                                   | < 0.001 |
| Age per 10 years               | 2.27 (2.13–2.44)                                  | < 0.001 | 2.34 (2.23–2.46)                                   | < 0.001 |
| Manual social class            | 1.20 (1.07–1.35)                                  | 0.002   | 1.22 (1.12–1.33)                                   | < 0.001 |
| Lower education level          | 1.15 (1.02–1.30)                                  | 0.023   | 1.19 (1.09–1.30)                                   | < 0.001 |
| <b>Model 2</b>                 |                                                   |         |                                                    |         |
| Male sex                       | 1.39 (1.24–1.56)                                  | < 0.001 | 1.47 (1.35–1.60)                                   | < 0.001 |
| Age per 10 years               | 2.11 (1.97–2.26)                                  | < 0.001 | 2.21 (2.10–2.32)                                   | < 0.001 |
| Manual social class            | 1.22 (1.08–1.37)                                  | 0.001   | 1.23 (1.13–1.34)                                   | < 0.001 |
| Lower education level          | 1.13 (1.00–1.28)                                  | 0.053   | 1.17 (1.07–1.28)                                   | < 0.001 |
| Prevalent CVD                  | 2.23 (1.85–2.68)                                  | < 0.001 | 2.25 (1.93–2.60)                                   | < 0.001 |
| Prevalent cancer               | 2.11 (1.75–2.54)                                  | < 0.001 | 1.92 (1.65–2.22)                                   | < 0.001 |
| Prevalent diabetes             | 4.41 (3.55–5.45)                                  | < 0.001 | 4.32 (3.57–5.21)                                   | < 0.001 |
| <b>Model 3</b>                 |                                                   |         |                                                    |         |
| Male sex                       | 1.24 (1.07–1.42)                                  | 0.003   | 1.33 (1.20–1.47)                                   | < 0.001 |
| Age per 10 years               | 2.16 (1.99–2.34)                                  | < 0.001 | 2.29 (2.16–2.43)                                   | < 0.001 |
| Manual social class            | 1.09 (0.95–1.25)                                  | 0.214   | 1.17 (1.06–1.29)                                   | 0.002   |
| Lower education level          | 1.06 (0.92–1.21)                                  | 0.447   | 1.08 (0.98–1.20)                                   | 0.112   |
| Current smoker                 | 1.71 (1.42–2.05)                                  | < 0.001 | 1.73 (1.51–1.98)                                   | < 0.001 |
| BMI>30 kg/m <sup>2</sup>       | 1.32 (1.12–1.56)                                  | < 0.001 | 1.45 (1.28–1.63)                                   | < 0.001 |
| Alcohol intake, units per week | 1.00 (0.99–1.01)                                  | 0.872   | 1.00 (1.00–1.01)                                   | 0.666   |
| Physically inactive            | 1.26 (1.10–1.44)                                  | < 0.001 | 1.15 (1.04–1.26)                                   | 0.006   |
| Plasma vitamin C per SD        | 0.81 (0.75–0.86)                                  | < 0.001 | 0.84 (0.80–0.88)                                   | < 0.001 |
| Prevalent CVD                  | 2.02 (1.63–2.49)                                  | < 0.001 | 2.17 (1.84–2.57)                                   | < 0.001 |
| Prevalent cancer               | 2.22 (1.79–2.72)                                  | < 0.001 | 2.06 (1.74–2.43)                                   | < 0.001 |
| Prevalent diabetes             | 3.53 (2.73–4.52)                                  | < 0.001 | 3.54 (2.85–4.39)                                   | < 0.001 |
| <b>Model 4</b>                 |                                                   |         |                                                    |         |
| Male sex                       | 1.23 (1.07–1.43)                                  | 0.005   | 1.32 (1.19–1.47)                                   | < 0.001 |
| Age per 10 years               | 2.08 (1.91–2.27)                                  | < 0.001 | 2.19 (2.06–2.33)                                   | < 0.001 |
| Manual social class            | 1.09 (0.95–1.25)                                  | 0.235   | 1.16 (1.05–1.28)                                   | 0.004   |
| Lower education level          | 1.06 (0.92–1.22)                                  | 0.420   | 1.09 (0.99–1.21)                                   | 0.091   |
| Current smoker                 | 1.72 (1.43–2.07)                                  | < 0.001 | 1.74 (1.52–2.00)                                   | < 0.001 |
| BMI>30 kg/m <sup>2</sup>       | 1.31 (1.11–1.54)                                  | 0.001   | 1.40 (1.24–1.58)                                   | < 0.001 |
| Alcohol intake, units per week | 1.00 (0.99–1.01)                                  | 0.878   | 1.00 (1.00–1.01)                                   | 0.800   |
| Physically inactive            | 1.25 (1.09–1.43)                                  | 0.001   | 1.14 (1.04–1.26)                                   | 0.008   |
| Plasma vitamin C per SD        | 0.81 (0.76–0.87)                                  | < 0.001 | 0.85 (0.81–0.89)                                   | < 0.001 |
| Systolic blood pressure per SD | 1.10 (1.03–1.17)                                  | 0.005   | 1.12 (1.07–1.18)                                   | < 0.001 |
| Total cholesterol per SD       | 0.99 (0.92–1.05)                                  | 0.690   | 0.99 (0.94–1.04)                                   | 0.614   |
| Prevalent CVD                  | 2.06 (1.66–2.54)                                  | < 0.001 | 2.22 (1.87–2.62)                                   | < 0.001 |
| Prevalent cancer               | 2.23 (1.80–2.75)                                  | < 0.001 | 2.05 (1.73–2.42)                                   | < 0.001 |
| Prevalent diabetes             | 3.42 (2.64–4.39)                                  | < 0.001 | 3.41 (2.74–4.24)                                   | < 0.001 |

† Charlson Comorbidity Index ≥3 vs Charlson Comorbidity Index ≤2 or no hospital admission.

The models in table 4 are similar to those used in table 3 but rather than adjusting for prevalent disease, participants who reported heart attack, stroke, cancer or diabetes at baseline were excluded. In this subgroup of participants without known common major diseases, in addition to age and sex, current cigarette smoking OR 1.74 (95% CI 1.52–2.00), BMI >30 kg/m<sup>2</sup> OR 1.40 (95% CI 1.24–1.58) and physical inactivity OR 1.14 (95% CI 1.04–1.26) were positively associated and plasma vitamin C OR 0.85 (95% CI 0.81–0.89) inversely associated with incident 10-year hospital admissions with multimorbidity after multivariable adjustment for age, sex, social class, education, alcohol consumption, systolic blood pressure and cholesterol (model 3). Manual social class and educational attainment were associated with incident multimorbidity in model 1 but were attenuated in model 2 and 3. An inverse association was observed for total cholesterol while systolic blood pressure appeared to be associated but the direction of association was



not consistent with the repeated analyses from TP2. There was no association for alcohol in these models.

The risk of multimorbidity in current cigarette smokers is equivalent to the risk in non-smokers 7 years older, while each 20  $\mu\text{mol/L}$  rise in plasma vitamin C (approximately two servings of fruit and vegetables per day [38] ) corresponds to a reduction in risk equivalent risk of those 3 years younger.

For peer review only

**Table 4 | Multivariable logistic regression of risk factors excluding participants with prevalent CVD, cancer or diabetes for 5-year and 10-year hospital admissions with multimorbidity in 22278 men and women**

|                                | 5-year multimorbidity †, 1999–2004<br>OR (95% CI) | p value | 10-year multimorbidity †, 1999–2009<br>OR (95% CI) | p value |
|--------------------------------|---------------------------------------------------|---------|----------------------------------------------------|---------|
| <b>Model 1</b>                 |                                                   |         |                                                    |         |
| Male sex                       | 1.47 (1.29–1.68)                                  | < 0.001 | 1.52 (1.38–1.67)                                   | < 0.001 |
| Age per 10 years               | 2.19 (2.02–2.37)                                  | < 0.001 | 2.31 (2.19–2.45)                                   | < 0.001 |
| Manual social class            | 1.23 (1.07–1.42)                                  | 0.003   | 1.22 (1.11–1.34)                                   | < 0.001 |
| Lower education level          | 1.20 (1.04–1.39)                                  | 0.011   | 1.16 (1.05–1.28)                                   | 0.003   |
| <b>Model 2</b>                 |                                                   |         |                                                    |         |
| Male sex                       | 1.32 (1.13–1.55)                                  | < 0.001 | 1.39 (1.24–1.55)                                   | < 0.001 |
| Age per 10 years               | 2.24 (2.05–2.46)                                  | < 0.001 | 2.40 (2.25–2.56)                                   | < 0.001 |
| Manual social class            | 1.13 (0.96–1.32)                                  | 0.131   | 1.17 (1.05–1.30)                                   | 0.006   |
| Lower education level          | 1.07 (0.91–1.25)                                  | 0.416   | 1.05 (0.93–1.17)                                   | 0.428   |
| Current smoker                 | 1.85 (1.50–2.26)                                  | < 0.001 | 1.84 (1.58–2.13)                                   | < 0.001 |
| BMI>30 kg/m <sup>2</sup>       | 1.31 (1.07–1.58)                                  | 0.006   | 1.53 (1.34–1.75)                                   | < 0.001 |
| Alcohol intake, units per week | 1.00 (0.99–1.01)                                  | 0.789   | 1.00 (1.00–1.01)                                   | 0.805   |
| Physically inactive            | 1.25 (1.07–1.46)                                  | 0.004   | 1.17 (1.05–1.31)                                   | 0.005   |
| Plasma vitamin C per SD        | 0.82 (0.76–0.89)                                  | < 0.001 | 0.85 (0.80–0.90)                                   | < 0.001 |
| <b>Model 3</b>                 |                                                   |         |                                                    |         |
| Male sex                       | 1.32 (1.12–1.56)                                  | 0.001   | 1.37 (1.22–1.54)                                   | < 0.001 |
| Age per 10 years               | 2.15 (1.95–2.37)                                  | < 0.001 | 2.30 (2.15–2.46)                                   | < 0.001 |
| Manual social class            | 1.11 (0.95–1.31)                                  | 0.178   | 1.15 (1.03–1.29)                                   | 0.012   |
| Lower education level          | 1.07 (0.91–1.26)                                  | 0.383   | 1.05 (0.94–1.18)                                   | 0.393   |
| Current smoker                 | 1.88 (1.52–2.30)                                  | < 0.001 | 1.86 (1.60–2.15)                                   | < 0.001 |
| BMI>30 kg/m <sup>2</sup>       | 1.30 (1.07–1.58)                                  | 0.007   | 1.48 (1.30–1.70)                                   | < 0.001 |
| Alcohol intake, units per week | 1.00 (0.99–1.01)                                  | 0.828   | 1.00 (0.99–1.01)                                   | 0.941   |
| Physically inactive            | 1.24 (1.06–1.45)                                  | 0.007   | 1.16 (1.04–1.29)                                   | 0.009   |
| Plasma vitamin C per SD        | 0.83 (0.77–0.90)                                  | < 0.001 | 0.86 (0.81–0.91)                                   | < 0.001 |
| Systolic blood pressure per SD | 1.12 (1.03–1.21)                                  | 0.005   | 1.13 (1.07–1.19)                                   | < 0.001 |
| Total cholesterol per SD       | 0.98 (0.91–1.06)                                  | 0.607   | 0.97 (0.92–1.03)                                   | 0.328   |

† Charlson Comorbidity Index  $\geq 3$  vs Charlson Comorbidity Index  $\leq 2$  or no hospital admission.

Supplementary table S1 shows the ICD-10 codes corresponding to Charlson Comorbidity Index disease groups. Supplementary table S2 shows the descriptive characteristics of participants at TP2 for 10-year CCI. Mean age in this subset, measured approximately 12 years after baseline, was 69.4. Hospital admissions and length of stay was similar to the baseline with multimorbid participants (CCI  $\geq 3$ ) having much longer duration than those with non-multimorbid participants or those who had no hospital admissions. Multimorbid participants were inactive, had lower plasma vitamin C (reflecting a lower intake of fruit and vegetables), were current or former smokers and had prevalent disease. In supplementary table S3, multivariable models of 10-year incident multimorbidity show that prevalent diabetes, CVD and cancer are all strongly associated. After excluding prevalent disease, supplementary table S4 shows multivariable associations in a group free from the most serious diseases at TP2. Both age and male sex are associated with subsequent multimorbidity, with educational attainment, current cigarette smoking, plasma vitamin C, BMI>30 kg/m<sup>2</sup> and physical inactivity all predicting future multimorbidity. Systolic blood pressure was attenuated while other factors including cholesterol were more strongly associated than at baseline.

## Discussion

1  
2 In this community-based population followed prospectively, we observed incident hospital multimorbidity  
3 admissions rates over 5-year and 10-years periods which, as expected were strongly related to increasing  
4 age. We also observed that those with multimorbid hospital admissions had substantially more days in  
5 hospital over the outcome periods. In multivariable analyses, risk of such admissions is predicted by age,  
6 male sex and several potentially modifiable factors. Participants at baseline who smoked cigarettes, had BMI  
7 >30, were physically inactive or had a diet low in fruit and vegetables all had higher likelihood of having  
8 subsequent hospital admissions with multimorbidity. Measurements made on a subset of the cohort 12  
9 years after baseline who were followed up subsequently confirmed the baseline findings while also  
10 demonstrating an association for low education level in an older cohort with incident multimorbidity.  
11  
12  
13  
14  
15  
16

### Strengths and limitations of study

17  
18  
19 Most studies of multimorbidity focus on its consequences and those examining risk factors for  
20 multimorbidity are largely cross-sectional. While many prospective studies have examined the relationship  
21 between baseline characteristics and specific incident diseases or mortality, establishing multimorbidity as  
22 an endpoint is more challenging. By using the Charlson Comorbidity Index to define multimorbidity, we  
23 were able to show that the chronic diseases defined by the index had considerably higher average length of  
24 stay than other conditions requiring hospitalisation and that length of stay increased with higher CCI score.  
25 The current population-based study in a defined community was able to assess incident hospital admissions  
26 with multimorbidity to enable estimates of 5-year and 10-year rates by age and sex. We were also able to  
27 document the relationship between demographic, lifestyle and physiological factors and subsequent  
28 hospitalisations for multimorbidity. The EPIC-Norfolk cohort has been followed for 20 years enabling us to  
29 examine the determinants of multimorbidity at two time-points: in mainly middle-aged participants of 40–  
30 79 years and mainly old-aged participants of 48–92 years in a sub-cohort 12 years later after major  
31 organisational changes had been made to the National Health Service (NHS). We were also able to examine  
32 associations with and without excluding participants with known prevalent conditions at baseline.  
33  
34  
35  
36  
37  
38  
39  
40  
41  
42

43 While not attempting to examine clusters or pathways of chronic disease, we have identified risk factors that  
44 predict any hospital admissions with multimorbidity. It is possible that some factors we observed will be  
45 more strongly associated with certain combinations of diseases and others less so. However, the burden of  
46 resources experienced by hospitals can best be mitigated by early public health advice, prior to the onset of  
47 disease if possible, which can only be general in nature. Our findings are in line with current public health  
48 advice such as smoking cessation, a diet containing fruit and vegetables and regular exercise and, given the  
49 huge additional burden placed on the NHS by multimorbidity, should further emphasise the need for public  
50 health advice and intervention.  
51  
52  
53  
54  
55

56  
57 Multimorbidity can be defined in a number of ways such as disease counts or using various indexes. [39] By  
58 restricting the definition to a relatively small subset of chronic conditions such as in the CCI, inevitably some  
59 conditions will not be counted. It is notable that the CCI does not include depression or mental health,  
60 asthma or respiratory diseases, epilepsy, hypothyroidism, musculoskeletal problems or atrial fibrillation, all  
common in a primary care setting. [40] In addition to the CCI and other commonly used systems [41],

1 authors have used many other definitions with variable numbers of underlying conditions and hence the  
2 prevalence of multimorbidity varies widely. However, CCI is a widely used measure of multimorbidity.

3 Since the CCI is weighted to predict mortality, it may be better able to assess health service burden than a  
4 simple disease count, since procedures required for higher weighted conditions will generally be more  
5 costly. However, it may be less effective as an indicator of multiple long-term conditions. Some chronic  
6 conditions such as musculoskeletal and mental health diseases not included in the CCI are nevertheless  
7 likely to require long stay inpatient care. However, increasing CCI had longer hospital length of stay in the  
8 present study and this has also been reported in several other studies. [42,43] Medical conditions such as  
9 obesity have well established links to many diseases but, as non-diseases, are not included in the CCI. The  
10 use of CCI  $\geq 3$  to define multimorbidity classifies a small number of participants with one serious disease  
11 with a high CCI weight as multimorbid. However, a sensitivity excluding these people gave virtually identical  
12 results. Studies examining the longitudinal predictors of future multimorbidity generally rely on self-  
13 reported disease but our study used the CCI from linked hospital medical coding.

14 When examining the relationship between lifestyle factors and health outcomes, confounding will always be  
15 a limitation. Individuals who smoke, are less physically active and eat a poor diet for example, are likely to  
16 differ from those with a contrasting lifestyle with respect to other factors relating to the likelihood of future  
17 multimorbidity including their age, sex, lifestyle factors examined in this study and others unknown.  
18 However, the associations we report were consistent after multivariable adjustment for other factors.  
19 Differential mortality is another possible limitation and would occur for any of the factors examined if  
20 participants with an apparently unhealthy characteristic were more likely to have died earlier than those  
21 with the contrary healthy characteristic and hence were less likely to use hospital services for the full follow-  
22 up period. However, the results for the 5-year follow-up period where very few deaths occurred were  
23 consistent with the longer 10-year follow-up period. While it is possible that some participants were  
24 multimorbid at baseline, we examined those with and without baseline self-reported major chronic disease.

### 25 **Comparison with other studies**

26 Estimates of the prevalence of multimorbidity vary widely, partly due to the variety of definitions, number of  
27 diseases, weighting etc. used in studies but range from 55 to 98% in the elderly. [6] Most studies report  
28 multimorbidity associated with age and present in more than half of those aged 65 and older. [3,44] Age was  
29 strongly associated with future hospitalisation and incident multimorbidity in our study and has been  
30 reported to increase hospitalised multimorbidity in elderly patients. [45] Many studies have found that  
31 women have a higher rate of multimorbidity than men [6,44,46–48], but we observed the converse with  
32 male sex strongly predicting future multimorbidity. The use of CCI in the context of prospective hospital  
33 admissions rather than cross-sectional multimorbidity in a primary care setting may explain the higher  
34 proportion of multimorbid men. Physical-mental comorbidity is reported higher among women in primary  
35 care [49] and mental health, which is not included in the CCI, may be more likely to be treated in a primary  
36 care than in an acute hospital setting.

37 Despite the considerable literature relating to multimorbidity, very few studies have examined the  
38 modifiable determinants of incident multimorbidity. Incident Cancer and cardiometabolic multimorbidity

was examined in a recent multi-centre study which included data from the present study [21]; pre-diagnostic healthy lifestyle behaviours were reported to be inversely associated with the risk. BMI was also reported to be associated with incident cardiometabolic multimorbidity in a pooled analysis of 16 cohort studies. [22] A Finnish study examined incident multimorbidity in both disease-free and those with baseline diabetes and CVD. [24] They reported some similar findings to the present study such as associations with cigarette smoking, physical inactivity and BMI but associations for low education level and systolic blood pressure were only found in men. Multimorbidity was defined using five common diseases and time to event 10-year follow-up was used rather than a follow-up period approach in this study. Participants in the Finnish cohort were younger than those in EPIC-Norfolk with the oldest participant 74 years at the end of follow-up against 90 years in EPIC-Norfolk baseline and 100 years at TP2. Studies using data from an English longitudinal cohort and using self-reported disease counts to define multimorbidity reported associations in physical activity, obesity and low level of wealth and an increased risk of multimorbidity when combined with other lifestyle factors such smoking, obesity and inadequate fruit and vegetable consumption. [25,26] However, they found no association with educational attainment or excess alcohol consumption. Education, which was associated in older participants at TP2 in our study, has been linked to multimorbidity in cross-sectional studies [50] and prospectively. [24] Socioeconomic status was reported to predict the development of multimorbidity throughout the life course in a Scottish longitudinal study. [51] Both educational attainment and occupational social class were attenuated in our study possibly due to the models including plasma vitamin C, also a marker of socioeconomic status. While smoking was a strong predictor, we did not find an association with alcohol drinking. However, other studies in the literature are inconsistent, with some finding no association with cigarette smoking and alcohol consumption in cross-sectional analyses [1]

### **Generalisability**

While hospital admissions with multimorbidity provide an objective indicator of both Health Service and individual burden of the condition, studies of hospital admissions in many countries are limited by factors relating to differential accessibility to health care such as health insurance, income and health care policy. Though not entirely free of differential accessibility, the NHS in the UK, with service free at the point of delivery for all residents, provides an opportunity to examine hospitalised multimorbidity with fewer of these constraints. Health care policy and criteria for admission change over time, not least in the UK over the 20-year period of this study, so we examined admissions and risk factors for multimorbidity over two independent time periods using new repeated measures and found consistent results.

### **Conclusions and policy implications**

We observed in a long-term population-based study that age, male sex and potentially modifiable factors including smoking, body mass index, physical inactivity and a diet low in fruit and vegetables predict future incident hospitalised multimorbidity. Multimorbidity is increasingly common among elderly hospital inpatients due in part to improved efficacy of treatments and drugs. While considerable effort is being focused on the progression, disease clustering and treatment of patients with multimorbidity, there has been less attention on the long-term predictors of future incident multimorbidity. This study suggests that modest difference in lifestyles may have the potential to mitigate the future burden of multimorbidity in the

population.

1  
2  
3  
4  
5  
6  
7  
8  
9  
10  
11  
12  
13  
14  
15  
16  
17  
18  
19  
20  
21  
22  
23  
24  
25  
26  
27  
28  
29  
30  
31  
32  
33  
34  
35  
36  
37  
38  
39  
40  
41  
42  
43  
44  
45  
46  
47  
48  
49  
50  
51  
52  
53  
54  
55  
56  
57  
58  
59  
60

For peer review only

## References

- 1 The Academy of Medical Sciences. Multimorbidity: a priority for global health research | The Academy of Medical Sciences. 2018. <https://acmedsci.ac.uk/policy/policy-projects/multimorbidity>
- 2 King DE, Xiang J, Pilkerton CS. Multi-morbidity Trends in United States adults, 1988–2014. *J Am Board Fam Med* 2018;**31**:503–13. doi:10.3122/jabfm.2018.04.180008
- 3 Barnett K, Mercer SW, Norbury M, *et al*. Epidemiology of multimorbidity and implications for health care, research, and medical education: a cross-sectional study. *The Lancet* 2012;**380**:37–43. doi:10.1016/S0140-6736(12)60240-2
- 4 Johnston MC, Crilly M, Black C, *et al*. Defining and measuring multimorbidity: a systematic review of systematic reviews. *Eur J Public Health* 2019;**29**:182–9. doi:10.1093/eurpub/cky098
- 5 van den Akker M, Buntinx F, Knottnerus JA. Comorbidity or multimorbidity. *European Journal of General Practice* 1996;**2**:65–70. doi:10.3109/13814789609162146
- 6 Marengoni A, Angleman S, Melis R, *et al*. Aging with multimorbidity: A systematic review of the literature. *Ageing Research Reviews* 2011;**10**:430–9. doi:10.1016/j.arr.2011.03.003
- 7 Feinstein AR. THE PRE-THERAPEUTIC CLASSIFICATION OF CO-MORBIDITY IN CHRONIC DISEASE. *J Chronic Dis* 1970;**23**:455–68. doi:10.1016/0021-9681(70)90054-8
- 8 Charlson ME, Pompei P, Ales KL, *et al*. A new method of classifying prognostic comorbidity in longitudinal studies: Development and validation. *Journal of Chronic Diseases* 1987;**40**:373–83. doi:10.1016/0021-9681(87)90171-8
- 9 Romano PS, Roos LL, Jollis JG. Presentation adapting a clinical comorbidity index for use with ICD-9-CM administrative data: Differing perspectives. *Journal of Clinical Epidemiology* 1993;**46**:1075–9. doi:10.1016/0895-4356(93)90103-8
- 10 Groot V de, Beckerman H, Lankhorst GJ, *et al*. How to measure comorbidity: a critical review of available methods. *Journal of Clinical Epidemiology* 2003;**56**:221–9. doi:10.1016/S0895-4356(02)00585-1
- 11 Extermann M. Measurement and impact of comorbidity in older cancer patients. *Critical Reviews in Oncology/Hematology* 2000;**35**:181–200. doi:10.1016/S1040-8428(00)00090-1
- 12 Quan H, Sundararajan V, Halfon P, *et al*. Coding Algorithms for Defining Comorbidities in ICD-9-CM and ICD-10 Administrative Data: *Medical Care* 2005;**43**:1130–9. doi:10.1097/01.mlr.0000182534.19832.83
- 13 Menendez ME, Neuhaus V, van Dijk CN, *et al*. The Elixhauser Comorbidity Method Outperforms the Charlson Index in Predicting Inpatient Death After Orthopaedic Surgery. *Clin Orthop Relat Res* 2014;**472**:2878–86. doi:10.1007/s11999-014-3686-7
- 14 Quan H, Li B, Couris CM, *et al*. Updating and Validating the Charlson Comorbidity Index and Score for Risk Adjustment in Hospital Discharge Abstracts Using Data From 6 Countries. *Am J Epidemiol* 2011;**173**:676–82. doi:10.1093/aje/kwq433
- 15 Sharabiani MTA, Aylin P, Bottle A. Systematic Review of Comorbidity Indices for Administrative Data: *Medical Care* 2012;**50**:1109–18. doi:10.1097/MLR.0b013e31825f64d0
- 16 Caughey GE, Ramsay EN, Vitry AI, *et al*. Comorbid chronic diseases, discordant impact on mortality in older people: a 14-year longitudinal population study. *Journal of Epidemiology & Community Health* 2010;**64**:1036–42. doi:10.1136/jech.2009.088260
- 17 Lund Jensen N, Pedersen HS, Vestergaard M, *et al*. The impact of socioeconomic status and multimorbidity on mortality: a population-based cohort study. *Clin Epidemiol* 2017;**9**:279–89. doi:10.2147/CLEP.S129415
- 18 Stanley J, Sarfati D. The new measuring multimorbidity index predicted mortality better than Charlson and Elixhauser indices among the general population. *Journal of Clinical Epidemiology* 2017;**92**:99–110.



doi:10.1016/j.jclinepi.2017.08.005

- 1  
2 19 Teh RO, Menzies OH, Connolly MJ, *et al.* Patterns of multi-morbidity and prediction of hospitalisation and all-  
3 cause mortality in advanced age. *Age Ageing* 2018;**47**:261–8. doi:10.1093/ageing/afx184  
4  
5 20 Nunes BP, Flores TR, Mielke GI, *et al.* Multimorbidity and mortality in older adults: A systematic review and  
6 meta-analysis. *Archives of Gerontology and Geriatrics* 2016;**67**:130–8. doi:10.1016/j.archger.2016.07.008  
7  
8 21 Freisling H, Viallon V, Lennon H, *et al.* Lifestyle factors and risk of multimorbidity of cancer and  
9 cardiometabolic diseases: a multinational cohort study. *BMC Medicine* 2020;**18**:5. doi:10.1186/s12916-019-  
10 1474-7  
11  
12 22 Kivimäki M, Kuosma E, Ferrie JE, *et al.* Overweight, obesity, and risk of cardiometabolic multimorbidity:  
13 pooled analysis of individual-level data for 120 813 adults from 16 cohort studies from the USA and Europe.  
14 *The Lancet Public Health* 2017;**2**:e277–85. doi:10.1016/S2468-2667(17)30074-9  
15  
16 23 Gijsen R, Hoeymans N, Schellevis FG, *et al.* Causes and consequences of comorbidity: A review. *Journal of*  
17 *Clinical Epidemiology* 2001;**54**:661–74. doi:10.1016/S0895-4356(00)00363-2  
18  
19 24 Wikström K, Lindström J, Harald K, *et al.* Clinical and lifestyle-related risk factors for incident multimorbidity:  
20 10-year follow-up of Finnish population-based cohorts 1982–2012. *European Journal of Internal Medicine*  
21 2015;**26**:211–6. doi:10.1016/j.ejim.2015.02.012  
22  
23 25 Dhalwani NN, Zaccardi F, O'Donovan G, *et al.* Association Between Lifestyle Factors and the Incidence of  
24 Multimorbidity in an Older English Population. *J Gerontol A Biol Sci Med Sci* 2017;**72**:528–34.  
25 doi:10.1093/gerona/glw146  
26  
27 26 Mounce LTA, Campbell JL, Henley WE, *et al.* Predicting Incident Multimorbidity. *Ann Fam Med* 2018;**16**:322–  
28 9. doi:10.1370/afm.2271  
29  
30 27 Luben R, Hayat S, Wareham N, *et al.* Usual physical activity and subsequent hospital usage over 20 years in a  
31 general population: the EPIC-Norfolk cohort. *BMC Geriatrics* 2020;**20**:165. doi:10.1186/s12877-020-01573-0  
32  
33 28 Luben R, Hayat S, Khawaja A, *et al.* Residential area deprivation and risk of subsequent hospital admission in a  
34 British population: the EPIC-Norfolk cohort. *BMJ Open* 2019;**9**. doi:10.1136/bmjopen-2019-031251  
35  
36 29 Luben R, Hayat S, Wareham N, *et al.* Predicting admissions and time spent in hospital over a decade in a  
37 population-based record linkage study: the EPIC-Norfolk cohort. *BMJ Open* 2016;**6**:e009461.  
38 doi:10.1136/bmjopen-2015-009461  
39  
40 30 Day N, Oakes S, Luben R, *et al.* EPIC-Norfolk: study design and characteristics of the cohort. European  
41 Prospective Investigation of Cancer. *Br J Cancer* 1999;**80 Suppl 1**:95–103.  
42  
43 31 Hayat SA, Luben R, Keevil VL, *et al.* Cohort Profile: A prospective cohort study of objective physical and  
44 cognitive capability and visual health in an ageing population of men and women in Norfolk (EPIC-Norfolk 3).  
45 *Int J Epidemiol* 2014;**43**:1063–72. doi:10.1093/ije/dyt086  
46  
47 32 Vuilleumier JP, Keck E. Fluorometric assay of vitamin C in biological materials using a centrifugal analyser with  
48 fluorescence attachment. *Journal of micronutrient analysis* Published Online First:  
49 1989.<http://agris.fao.org/agris-search/search.do?recordID=US201301738860>  
50  
51 33 Bland R. Measuring “Social Class”: A Discussion of the Registrar-General’s Classification. *Sociology*  
52 1979;**13**:283–91. doi:10.1177/003803857901300209  
53  
54 34 McFadden E, Luben R, Khaw K-T. Different measures of social class in women and mortality. *Eur J Epidemiol*  
55 2009;**24**:231–6. doi:10.1007/s10654-009-9332-0  
56  
57 35 Wareham NJ, Jakes RW, Rennie KL, *et al.* Validity and repeatability of a simple index derived from the short  
58 physical activity questionnaire used in the European Prospective Investigation into Cancer and Nutrition  
59 (EPIC) study. *Public Health Nutrition* 2003;**6**:407–13. doi:10.1079/PHN2002439  
60



- 1  
2  
3  
4  
5  
6  
7  
8  
9  
10  
11  
12  
13  
14  
15  
16  
17  
18  
19  
20  
21  
22  
23  
24  
25  
26  
27  
28  
29  
30  
31  
32  
33  
34  
35  
36  
37  
38  
39  
40  
41  
42  
43  
44  
45  
46  
47  
48  
49  
50  
51  
52  
53  
54  
55  
56  
57  
58  
59  
60
- 36 Khaw K-T, Jakes R, Bingham S, *et al.* Work and leisure time physical activity assessed using a simple, pragmatic, validated questionnaire and incident cardiovascular disease and all-cause mortality in men and women: The European Prospective Investigation into Cancer in Norfolk prospective population study. *Int J Epidemiol* 2006;**35**:1034–43. doi:10.1093/ije/dyl079
- 37 Gasparini A. comorbidity: An R package for computing comorbidity scores. *JOSS* 2018;**3**:648. doi:10.21105/joss.00648
- 38 Khaw K-T, Wareham N, Bingham S, *et al.* Combined Impact of Health Behaviours and Mortality in Men and Women: The EPIC-Norfolk Prospective Population Study. *PLOS Medicine* 2008;**5**:e12. doi:10.1371/journal.pmed.0050012
- 39 Wallace E, McDowell R, Bennett K, *et al.* Comparison of count-based multimorbidity measures in predicting emergency admission and functional decline in older community-dwelling adults: a prospective cohort study. *BMJ Open* 2016;**6**. doi:10.1136/bmjopen-2016-013089
- 40 Department of Health UK. Long Term Conditions Compendium of Information: Third Edition. 2012. <https://www.gov.uk/government/publications/long-term-conditions-compendium-of-information-third-edition>
- 41 Elixhauser A, Steiner C, Harris DR, *et al.* Comorbidity Measures for Use with Administrative Data: *Medical Care* 1998;**36**:8–27. doi:10.1097/00005650-199801000-00004
- 42 Librero J, Peiró S, Ordiñana R. Chronic Comorbidity and Outcomes of Hospital Care: Length of Stay, Mortality, and Readmission at 30 and 365 Days. *Journal of Clinical Epidemiology* 1999;**52**:171–9. doi:10.1016/S0895-4356(98)00160-7
- 43 Palladino R, Tayu Lee J, Ashworth M, *et al.* Associations between multimorbidity, healthcare utilisation and health status: evidence from 16 European countries. *Age Ageing* 2016;**45**:431–5. doi:10.1093/ageing/afw044
- 44 Nguyen H, Manolova G, Daskalopoulou C, *et al.* Prevalence of multimorbidity in community settings: A systematic review and meta-analysis of observational studies. *J Comorb* 2019;**9**:2235042X1987093. doi:10.1177/2235042X19870934
- 45 Lai FTT, Wong SYS, Yip BHK, *et al.* Multimorbidity in middle age predicts more subsequent hospital admissions than in older age: A nine-year retrospective cohort study of 121,188 discharged in-patients. *European Journal of Internal Medicine* 2019;**61**:103–11. doi:10.1016/j.ejim.2018.12.001
- 46 Violán C, Foguet-Boreu Q, Roso-Llorach A, *et al.* Burden of multimorbidity, socioeconomic status and use of health services across stages of life in urban areas: a cross-sectional study. *BMC Public Health* 2014;**14**:530. doi:10.1186/1471-2458-14-530
- 47 Chung RY, Mercer S, Lai FTT, *et al.* Socioeconomic Determinants of Multimorbidity: A Population-Based Household Survey of Hong Kong Chinese. *PLOS ONE* 2015;**10**:e0140040. doi:10.1371/journal.pone.0140040
- 48 Alimohammadian M, Majidi A, Yaseri M, *et al.* Multimorbidity as an important issue among women: results of a gender difference investigation in a large population-based cross-sectional study in West Asia. *BMJ Open* 2017;**7**. doi:10.1136/bmjopen-2016-013548
- 49 Cassell A, Edwards D, Harshfield A, *et al.* The epidemiology of multimorbidity in primary care: a retrospective cohort study. *Br J Gen Pract* 2018;**68**:e245–51. doi:10.3399/bjgp18X695465
- 50 Nagel G, Peter R, Braig S, *et al.* The impact of education on risk factors and the occurrence of multimorbidity in the EPIC-Heidelberg cohort. *BMC Public Health* 2008;**8**:384. doi:10.1186/1471-2458-8-384
- 51 Katikireddi SV, Skivington K, Leyland AH, *et al.* The contribution of risk factors to socioeconomic inequalities in multimorbidity across the lifecourse: a longitudinal analysis of the Twenty-07 cohort. *BMC Med* 2017;**15**. doi:10.1186/s12916-017-0913-6

## Figure captions

Figure 1 | Flow diagram of cohort recruitment and approaches

Figure 2 | Rate of hospital admissions with multimorbidity, defined as Charlson Comorbidity Index  $\geq 3$ , by age group and sex, over the 10-year follow-up period 1999–2009

## Supplementary material

Supplementary Table S1 | Charlson Comorbidity Index, ICD-10 codes and weighting

Supplementary Table S2 | Descriptive characteristics at TP2 in 9814 men and women aged 48–92 by 10-year Charlson Comorbidity Index, 2009–2019

Supplementary Table S3 | Multivariable logistic regression of risk factors for Charlson 5-year and 10-year hospital admissions with multimorbidity at TP2 in 9814 men and women

Supplementary Table S4 | Multivariable logistic regression of risk factors excluding participants with prevalent CVD, cancer or diabetes at TP2 for Charlson 5-year and 10-year hospital admissions with multimorbidity at TP2 in 8185 men and women

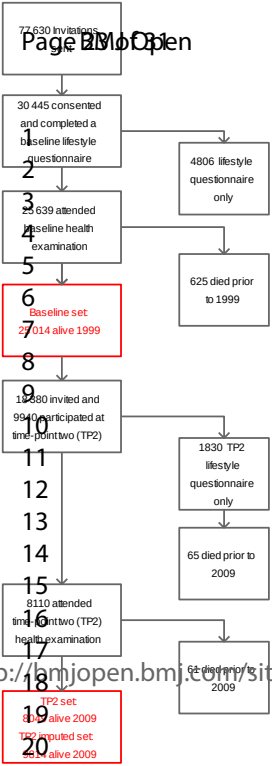

26  
27  
28  
29  
30  
31  
32  
33  
34  
35

Minimum body mass index (BMI) for men and women aged 45-75 years

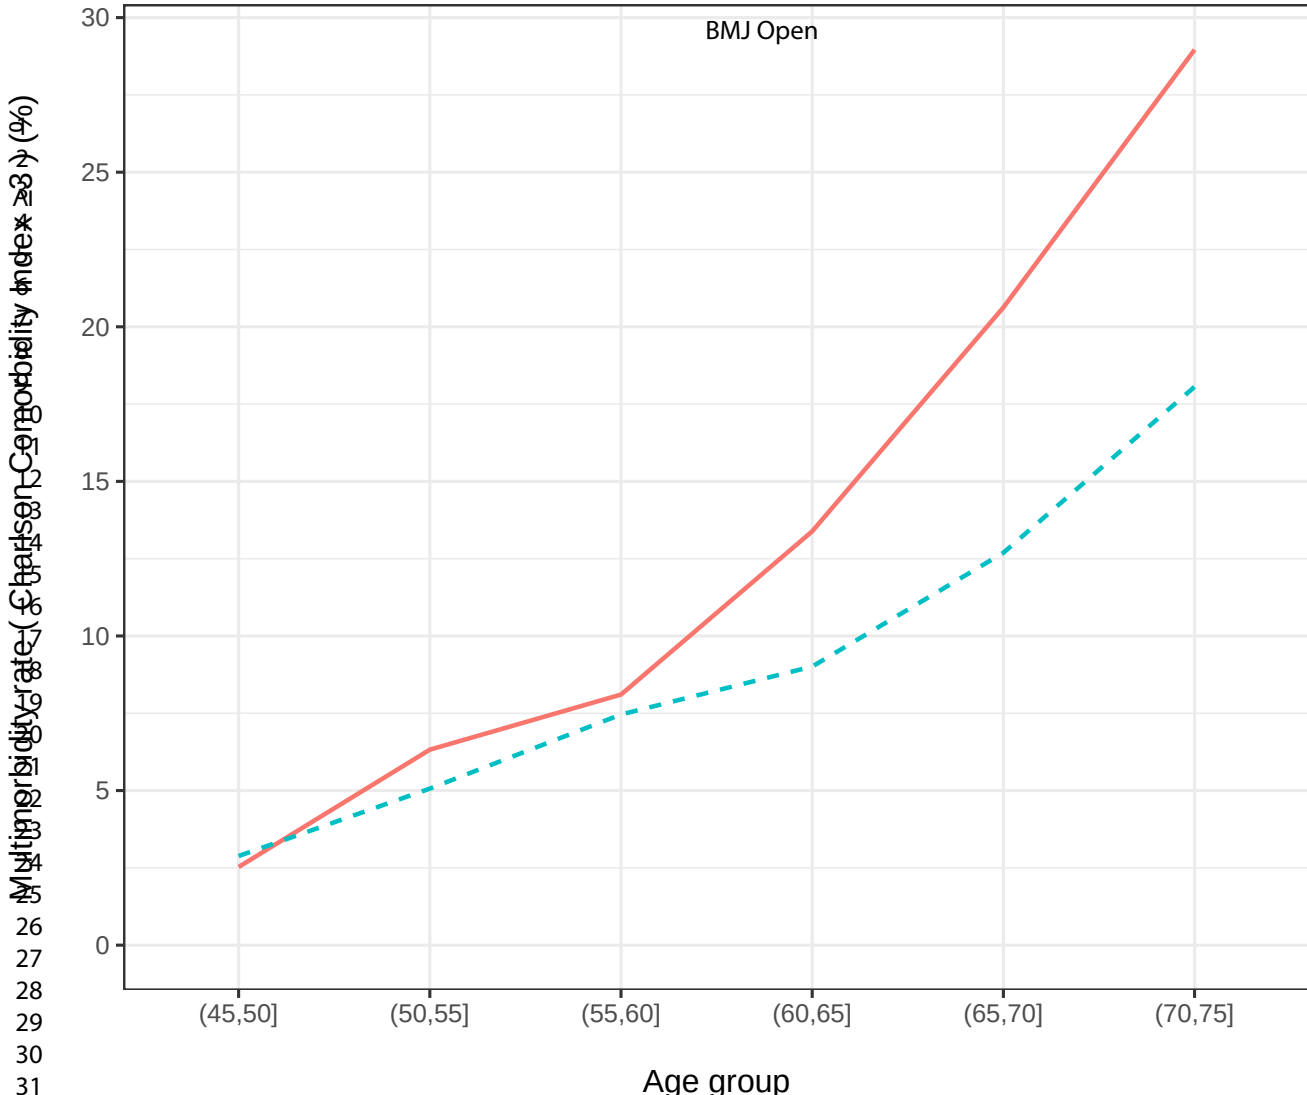

Sex  
— Men  
- - Women

# Sociodemographic and lifestyle predictors of incident hospital admissions with multimorbidity in a general population 1999–2019: the EPIC-Norfolk cohort

## Supplementary material

Supplementary Table S1 | Charlson Comorbidity Index, ICD-10 codes and weighting

Supplementary Table S2 | Descriptive characteristics at TP2 in 9814 men and women aged 48–92 by 10-year Charlson Comorbidity Index, 2009–2019

Supplementary Table S3 | Multivariable logistic regression of risk factors for Charlson 5-year and 10-year hospital admissions with multimorbidity at TP2 in 9814 men and women

Supplementary Table S4 | Multivariable logistic regression of risk factors excluding participants with prevalent CVD, cancer or diabetes at TP2 for Charlson 5-year and 10-year hospital admissions with multimorbidity at TP2 in 8185 men and women

Supplementary Table S1 | Charlson Comorbidity Index, ICD-10 codes and weighting

|                                                                                     | ICD-10 codes                                                                                                                                                                  |
|-------------------------------------------------------------------------------------|-------------------------------------------------------------------------------------------------------------------------------------------------------------------------------|
| Myocardial infarction                                                               | I21.x, I22.x, I25.2                                                                                                                                                           |
| Congestive heart failure                                                            | I09.9, I11.0, I13.0, I13.2, I25.5, I42.0, I42.5–I42.9, I43.x, I50.x, P29.0                                                                                                    |
| Peripheral vascular disease                                                         | I70.x, I71.x, I73.1, I73.8, I73.9, I77.1, I79.0, I79.2, K55.1, K55.8, K55.9, Z95.8, Z95.9                                                                                     |
| Cerebrovascular disease                                                             | G45.x, G46.x, H34.0, I60.x–I69.x                                                                                                                                              |
| Dementia                                                                            | F00.x–F03.x, F05.1, G30.x, G31.1                                                                                                                                              |
| Chronic pulmonary disease                                                           | I27.8, I27.9, J40.x–J47.x, J60.x–J67.x, J68.4, J70.1, J70.3                                                                                                                   |
| Rheumatic disease                                                                   | M05.x, M06.x, M31.5, M32.x–M34.x, M35.1, M35.3, M36.0                                                                                                                         |
| Peptic ulcer disease                                                                | K25.x–K28.x                                                                                                                                                                   |
| Mild liver disease                                                                  | B18.x, K70.0–K70.3, K70.9, K71.3–K71.5, K71.7, K73.x, K74.x, K76.0, K76.2–K76.4, K76.8, K76.9, Z94.4                                                                          |
| Diabetes without chronic complication                                               | E10.0, E10.1, E10.6, E10.8, E10.9, E11.0, E11.1, E11.6, E11.8, E11.9, E12.0, E12.1, E12.6, E12.8, E12.9, E13.0, E13.1, E13.6, E13.8, E13.9, E14.0, E14.1, E14.6, E14.8, E14.9 |
| Diabetes with chronic complication                                                  | E10.2–E10.5, E10.7, E11.2–E11.5, E11.7, E12.2–E12.5, E12.7, E13.2–E13.5, E13.7, E14.2–E14.5, E14.7                                                                            |
| Hemiplegia or paraplegia                                                            | G04.1, G11.4, G80.1, G80.2, G81.x, G82.x, G83.0–G83.4, G83.9                                                                                                                  |
| Renal disease                                                                       | I12.0, I13.1, N03.2–N03.7, N05.2–N05.7, N18.x, N19.x, N25.0, Z49.0–Z49.2, Z94.0, Z99.2                                                                                        |
| Any malignancy, including lymphoma and leukaemia, except malignant neoplasm of skin | C00.x–C26.x, C30.x–C34.x, C37.x–C41.x, C43.x, C45.x–C58.x, C60.x–C76.x, C81.x–C85.x, C88.x, C90.x–C97.x                                                                       |
| Moderate or severe liver disease                                                    | I85.0, I85.9, I86.4, I98.2, K70.4, K71.1, K72.1, K72.9, K76.5, K76.6, K76.7                                                                                                   |
| Metastatic solid tumour                                                             | C77.x–C80.x                                                                                                                                                                   |
| AIDS/HIV                                                                            | B20.x–B22.x, B24.x                                                                                                                                                            |

All comorbidities are assigned a weight of 1 except hemiplegia/paraplegia, renal disease, and malignancies (weight=2); moderate/severe liver disease (weight=3); metastatic solid tumour and AIDS/HIV (weight=6). For diseases with two levels of severity (liver disease, diabetes and cancer), the less severe version is assigned weight=0 if the more severe version is also present in a patient. Reproduced from documentation for the 'comorbidity' R package (Gasparini, 2019)

**Supplementary Table S2 | Descriptive characteristics at TP2 in 9814 men and women aged 48–92 by 10-year Charlson Comorbidity Index, 2009–2019**

|                                                      | Total       | No admissions | CCI=0       | CCI=1       | CCI=2       | CCI≥3       |
|------------------------------------------------------|-------------|---------------|-------------|-------------|-------------|-------------|
| <b>Hospital duration 2009–2019, days</b>             |             |               |             |             |             |             |
| Mean ±SD                                             | 17.7 ±36.2  | 0.0 ±0.0      | 6.5 ±14.0   | 19.3 ±42.8  | 26.1 ±42.2  | 46.3 ±48.1  |
| <b>Total hospital admissions 2009–2019</b>           |             |               |             |             |             |             |
| Mean ±SD                                             | 4.4 ±7.9    | 0.0 ±0.0      | 2.8 ±3.0    | 4.5 ±6.0    | 6.0 ±6.7    | 10.1 ±13.5  |
| <b>Age at TP2, years</b>                             |             |               |             |             |             |             |
| Mean ±SD                                             | 69.4 ±8.4   | 65.1 ±7.7     | 67.6 ±7.7   | 70.5 ±8.1   | 71.7 ±8.1   | 74.1 ±7.8   |
| <b>Sex (n (%))</b>                                   |             |               |             |             |             |             |
| Men                                                  | 4252        | 695 (16.3)    | 1294 (30.4) | 631 (14.8)  | 558 (13.1)  | 1074 (25.3) |
| Women                                                | 5562        | 1166 (21.0)   | 1956 (35.2) | 914 (16.4)  | 618 (11.1)  | 908 (16.3)  |
| <b>Body mass index at TP2, kg/m<sup>2</sup></b>      |             |               |             |             |             |             |
| Mean ±SD                                             | 26.9 ±4.3   | 26.2 ±4.3     | 26.5 ±4.0   | 27.3 ±4.4   | 27.3 ±4.5   | 27.7 ±4.5   |
| <b>Cigarette smoking at TP2 (n (%))</b>              |             |               |             |             |             |             |
| Current                                              | 442         | 88 (19.9)     | 116 (26.2)  | 65 (14.7)   | 79 (17.9)   | 94 (21.3)   |
| Former                                               | 4508        | 755 (16.7)    | 1375 (30.5) | 741 (16.4)  | 565 (12.5)  | 1072 (23.8) |
| Never                                                | 4864        | 1018 (20.9)   | 1759 (36.2) | 739 (15.2)  | 532 (10.9)  | 816 (16.8)  |
| <b>Social class dichotomised (n (%))</b>             |             |               |             |             |             |             |
| Non-manual                                           | 6294        | 1205 (19.1)   | 2127 (33.8) | 993 (15.8)  | 749 (11.9)  | 1220 (19.4) |
| Manual                                               | 3411        | 636 (18.6)    | 1087 (31.9) | 528 (15.5)  | 424 (12.4)  | 736 (21.6)  |
| <b>Level of education (n (%))</b>                    |             |               |             |             |             |             |
| Higher level                                         | 7025        | 1460 (20.8)   | 2419 (34.4) | 1074 (15.3) | 791 (11.3)  | 1281 (18.2) |
| Lower level                                          | 2787        | 401 (14.4)    | 830 (29.8)  | 471 (16.9)  | 385 (13.8)  | 700 (25.1)  |
| <b>Simple physical activity index at TP2 (n (%))</b> |             |               |             |             |             |             |
| Inactive                                             | 3924        | 592 (15.1)    | 1072 (27.3) | 687 (17.5)  | 545 (13.9)  | 1028 (26.2) |
| Moderately inactive                                  | 2682        | 555 (20.7)    | 940 (35.0)  | 404 (15.1)  | 311 (11.6)  | 472 (17.6)  |
| Moderately active                                    | 1654        | 387 (23.4)    | 604 (36.5)  | 231 (14.0)  | 167 (10.1)  | 265 (16.0)  |
| Active                                               | 1442        | 313 (21.7)    | 601 (41.7)  | 195 (13.5)  | 139 (9.6)   | 194 (13.5)  |
| <b>Alcohol intake at TP2, units per week</b>         |             |               |             |             |             |             |
| Mean ±SD                                             | 5.7 ±8.2    | 6.3 ±8.0      | 5.8 ±7.9    | 5.5 ±8.3    | 5.3 ±7.8    | 5.5 ±9.1    |
| <b>Plasma vitamin C at TP2, µmol/L</b>               |             |               |             |             |             |             |
| Mean ±SD                                             | 63.0 ±22.2  | 66.0 ±21.5    | 65.7 ±21.6  | 63.2 ±22.8  | 59.9 ±22.4  | 57.7 ±21.9  |
| <b>Systolic blood pressure at TP2, mmHg</b>          |             |               |             |             |             |             |
| Mean ±SD                                             | 136.5 ±17.1 | 134.7 ±15.9   | 135.8 ±16.3 | 138.5 ±18.4 | 136.6 ±16.8 | 138.0 ±18.1 |
| <b>Total cholesterol at TP2, mmol/L</b>              |             |               |             |             |             |             |
| Mean ±SD                                             | 5.4 ±1.1    | 5.6 ±1.1      | 5.5 ±1.1    | 5.3 ±1.1    | 5.2 ±1.2    | 5.0 ±1.2    |
| <b>Prevalent heart attack at TP2 (n (%))</b>         |             |               |             |             |             |             |
| No reported heart attack at TP2                      | 9455        | 1833 (19.4)   | 3211 (34.0) | 1499 (15.9) | 1116 (11.8) | 1796 (19.0) |
| Self-reported heart attack at TP2                    | 359         | 28 (7.8)      | 39 (10.9)   | 46 (12.8)   | 60 (16.7)   | 186 (51.8)  |
| <b>Prevalent stroke at TP2 (n (%))</b>               |             |               |             |             |             |             |
| No reported stroke at TP2                            | 9577        | 1843 (19.2)   | 3215 (33.6) | 1510 (15.8) | 1141 (11.9) | 1868 (19.5) |
| Self-reported stroke at TP2                          | 237         | 18 (7.6)      | 35 (14.8)   | 35 (14.8)   | 35 (14.8)   | 114 (48.1)  |
| <b>Prevalent cancer at TP2 (n (%))</b>               |             |               |             |             |             |             |
| No reported cancer at TP2                            | 8888        | 1744 (19.6)   | 2987 (33.6) | 1398 (15.7) | 1052 (11.8) | 1707 (19.2) |
| Self-reported cancer at TP2                          | 926         | 117 (12.6)    | 263 (28.4)  | 147 (15.9)  | 124 (13.4)  | 275 (29.7)  |
| <b>Prevalent diabetes at TP2 (n (%))</b>             |             |               |             |             |             |             |
| No reported diabetes at TP2                          | 9477        | 1834 (19.4)   | 3238 (34.2) | 1477 (15.6) | 1124 (11.9) | 1804 (19.0) |
| Self-reported diabetes at TP2                        | 337         | 27 (8.0)      | 12 (3.6)    | 68 (20.2)   | 52 (15.4)   | 178 (52.8)  |

**Supplementary Table S3 | Multivariable logistic regression of risk factors for Charlson 5-year and 10-year hospital admissions with multimorbidity at TP2 in 9814 men and women**

|                                   | Charlson 5-year multimorbidity †, 2009–2014<br>OR (95% CI) | p value | Charlson 10-year multimorbidity †, 2009–2019<br>OR (95% CI) | p value |
|-----------------------------------|------------------------------------------------------------|---------|-------------------------------------------------------------|---------|
| <b>Model 1</b>                    |                                                            |         |                                                             |         |
| Male sex                          | 1.67 (1.46–1.91)                                           | < 0.001 | 1.72 (1.55–1.91)                                            | < 0.001 |
| Age per 10 years                  | 2.35 (2.16–2.56)                                           | < 0.001 | 2.36 (2.21–2.53)                                            | < 0.001 |
| Manual social class at baseline   | 1.02 (0.88–1.18)                                           | 0.774   | 1.11 (0.99–1.24)                                            | 0.072   |
| Lower education level at baseline | 1.12 (0.96–1.30)                                           | 0.154   | 1.26 (1.12–1.42)                                            | < 0.001 |
| <b>Model 2</b>                    |                                                            |         |                                                             |         |
| Male sex                          | 1.60 (1.39–1.84)                                           | < 0.001 | 1.65 (1.48–1.84)                                            | < 0.001 |
| Age per 10 years                  | 2.19 (2.00–2.39)                                           | < 0.001 | 2.22 (2.07–2.38)                                            | < 0.001 |
| Manual social class at baseline   | 1.01 (0.87–1.18)                                           | 0.850   | 1.11 (0.99–1.24)                                            | 0.082   |
| Lower education level at baseline | 1.10 (0.94–1.29)                                           | 0.215   | 1.25 (1.11–1.41)                                            | < 0.001 |
| Prevalent CVD                     | 2.25 (1.78–2.81)                                           | < 0.001 | 2.60 (2.13–3.18)                                            | < 0.001 |
| Prevalent cancer                  | 1.83 (1.50–2.22)                                           | < 0.001 | 1.61 (1.37–1.90)                                            | < 0.001 |
| Prevalent diabetes                | 3.96 (3.08–5.08)                                           | < 0.001 | 3.91 (3.09–4.96)                                            | < 0.001 |
| <b>Model 3</b>                    |                                                            |         |                                                             |         |
| Male sex                          | 1.44 (1.24–1.67)                                           | < 0.001 | 1.52 (1.35–1.71)                                            | < 0.001 |
| Age per 10 years                  | 2.14 (1.95–2.35)                                           | < 0.001 | 2.23 (2.07–2.39)                                            | < 0.001 |
| Manual social class at baseline   | 0.97 (0.83–1.13)                                           | 0.692   | 1.07 (0.95–1.20)                                            | 0.287   |
| Lower education level at baseline | 1.04 (0.89–1.22)                                           | 0.598   | 1.20 (1.06–1.35)                                            | 0.004   |
| Current smoker                    | 1.44 (1.02–1.99)                                           | 0.032   | 1.45 (1.11–1.86)                                            | 0.005   |
| BMI>30 kg/m <sup>2</sup>          | 1.38 (1.17–1.63)                                           | < 0.001 | 1.54 (1.35–1.75)                                            | < 0.001 |
| Alcohol intake, units per week    | 1.00 (0.99–1.01)                                           | 0.611   | 1.00 (0.99–1.01)                                            | 0.664   |
| Physically inactive               | 1.30 (1.12–1.50)                                           | < 0.001 | 1.13 (1.01–1.26)                                            | 0.034   |
| Plasma vitamin C per SD           | 0.80 (0.74–0.87)                                           | < 0.001 | 0.83 (0.79–0.88)                                            | < 0.001 |
| Prevalent CVD                     | 2.11 (1.67–2.64)                                           | < 0.001 | 2.46 (2.01–3.02)                                            | < 0.001 |
| Prevalent cancer                  | 1.81 (1.48–2.20)                                           | < 0.001 | 1.61 (1.36–1.89)                                            | < 0.001 |
| Prevalent diabetes                | 3.55 (2.75–4.56)                                           | < 0.001 | 3.47 (2.74–4.41)                                            | < 0.001 |
| <b>Model 4</b>                    |                                                            |         |                                                             |         |
| Male sex                          | 1.35 (1.15–1.58)                                           | < 0.001 | 1.41 (1.25–1.60)                                            | < 0.001 |
| Age per 10 years                  | 2.11 (1.92–2.32)                                           | < 0.001 | 2.20 (2.04–2.37)                                            | < 0.001 |
| Manual social class at baseline   | 0.97 (0.83–1.13)                                           | 0.692   | 1.07 (0.95–1.20)                                            | 0.287   |
| Lower education level at baseline | 1.04 (0.89–1.22)                                           | 0.609   | 1.20 (1.06–1.35)                                            | 0.004   |
| Current smoker                    | 1.43 (1.02–1.98)                                           | 0.034   | 1.44 (1.10–1.85)                                            | 0.006   |
| BMI>30 kg/m <sup>2</sup>          | 1.37 (1.16–1.62)                                           | < 0.001 | 1.53 (1.34–1.74)                                            | < 0.001 |
| Alcohol intake, units per week    | 1.00 (0.99–1.01)                                           | 0.449   | 1.00 (1.00–1.01)                                            | 0.416   |
| Physically inactive               | 1.29 (1.12–1.50)                                           | < 0.001 | 1.13 (1.01–1.26)                                            | 0.038   |
| Plasma vitamin C per SD           | 0.81 (0.75–0.87)                                           | < 0.001 | 0.84 (0.79–0.89)                                            | < 0.001 |
| Systolic blood pressure per SD    | 0.99 (0.92–1.07)                                           | 0.854   | 0.99 (0.94–1.05)                                            | 0.769   |
| Total cholesterol per SD          | 0.91 (0.84–0.98)                                           | 0.014   | 0.89 (0.84–0.95)                                            | < 0.001 |
| Prevalent CVD                     | 2.02 (1.60–2.54)                                           | < 0.001 | 2.34 (1.91–2.87)                                            | < 0.001 |
| Prevalent cancer                  | 1.81 (1.48–2.20)                                           | < 0.001 | 1.60 (1.36–1.89)                                            | < 0.001 |
| Prevalent diabetes                | 3.28 (2.52–4.24)                                           | < 0.001 | 3.16 (2.48–4.03)                                            | < 0.001 |

† Charlson Comorbidity Index ≥3 vs Charlson Comorbidity Index ≤2 or no hospital admission.



**Supplementary Table S4 | Multivariable logistic regression of risk factors excluding participants with prevalent CVD, cancer or diabetes at TP2 for 5-year and 10-year hospital admissions with multimorbidity at TP2 in 8185 men and women**

|                                   | 5-year follow-up period †, 2009–2014<br>OR (95% CI) | p value | 10-year follow-up period †, 2009–2019<br>OR (95% CI) | p value |
|-----------------------------------|-----------------------------------------------------|---------|------------------------------------------------------|---------|
| <b>Model 1</b>                    |                                                     |         |                                                      |         |
| Male sex                          | 1.44 (1.22–1.70)                                    | < 0.001 | 1.55 (1.37–1.75)                                     | < 0.001 |
| Age per 10 years                  | 2.36 (2.13–2.62)                                    | < 0.001 | 2.39 (2.21–2.58)                                     | < 0.001 |
| Manual social class at baseline   | 0.99 (0.82–1.18)                                    | 0.888   | 1.11 (0.97–1.27)                                     | 0.122   |
| Lower education level at baseline | 1.12 (0.93–1.36)                                    | 0.220   | 1.26 (1.09–1.44)                                     | 0.001   |
| <b>Model 2</b>                    |                                                     |         |                                                      |         |
| Male sex                          | 1.25 (1.05–1.50)                                    | 0.015   | 1.39 (1.22–1.59)                                     | < 0.001 |
| Age per 10 years                  | 2.36 (2.12–2.63)                                    | < 0.001 | 2.43 (2.24–2.64)                                     | < 0.001 |
| Manual social class at baseline   | 0.93 (0.78–1.12)                                    | 0.471   | 1.06 (0.93–1.22)                                     | 0.373   |
| Lower education level at baseline | 1.06 (0.88–1.29)                                    | 0.518   | 1.21 (1.05–1.39)                                     | 0.008   |
| Current smoker                    | 1.81 (1.23–2.59)                                    | 0.002   | 1.66 (1.24–2.20)                                     | < 0.001 |
| BMI>30 kg/m <sup>2</sup>          | 1.42 (1.16–1.73)                                    | < 0.001 | 1.60 (1.38–1.86)                                     | < 0.001 |
| Alcohol intake, units per week    | 1.01 (1.00–1.02)                                    | 0.238   | 1.01 (1.00–1.01)                                     | 0.109   |
| Physically inactive               | 1.18 (0.99–1.41)                                    | 0.061   | 1.10 (0.97–1.26)                                     | 0.138   |
| Plasma vitamin C per SD           | 0.79 (0.72–0.86)                                    | < 0.001 | 0.83 (0.77–0.88)                                     | < 0.001 |
| <b>Model 3</b>                    |                                                     |         |                                                      |         |
| Male sex                          | 1.16 (0.96–1.40)                                    | 0.135   | 1.29 (1.12–1.49)                                     | < 0.001 |
| Age per 10 years                  | 2.29 (2.05–2.57)                                    | < 0.001 | 2.39 (2.20–2.60)                                     | < 0.001 |
| Manual social class at baseline   | 0.93 (0.77–1.12)                                    | 0.446   | 1.06 (0.93–1.21)                                     | 0.385   |
| Lower education level at baseline | 1.06 (0.88–1.28)                                    | 0.534   | 1.21 (1.05–1.39)                                     | 0.009   |
| Current smoker                    | 1.81 (1.23–2.59)                                    | 0.002   | 1.64 (1.23–2.18)                                     | < 0.001 |
| BMI>30 kg/m <sup>2</sup>          | 1.39 (1.14–1.70)                                    | 0.001   | 1.59 (1.36–1.84)                                     | < 0.001 |
| Alcohol intake, units per week    | 1.01 (1.00–1.02)                                    | 0.163   | 1.01 (1.00–1.02)                                     | 0.054   |
| Physically inactive               | 1.18 (0.99–1.40)                                    | 0.071   | 1.10 (0.96–1.25)                                     | 0.161   |
| Plasma vitamin C per SD           | 0.79 (0.72–0.87)                                    | < 0.001 | 0.83 (0.77–0.89)                                     | < 0.001 |
| Systolic blood pressure per SD    | 1.03 (0.95–1.12)                                    | 0.466   | 0.99 (0.93–1.06)                                     | 0.866   |
| Total cholesterol per SD          | 0.88 (0.80–0.96)                                    | 0.005   | 0.89 (0.83–0.95)                                     | < 0.001 |

† Charlson Comorbidity Index  $\geq 3$  vs Charlson  $\leq 2$  or no hospital admission.

STROBE Statement—Checklist of items that should be included in reports of *cohort studies*

|                              | Item No | Recommendation                                                                                                                                                                                                        | Page No                    |
|------------------------------|---------|-----------------------------------------------------------------------------------------------------------------------------------------------------------------------------------------------------------------------|----------------------------|
| <b>Title and abstract</b>    | 1       | (a) Indicate the study's design with a commonly used term in the title or the abstract                                                                                                                                | 1                          |
|                              |         | (b) Provide in the abstract an informative and balanced summary of what was done and what was found                                                                                                                   | 2                          |
| <b>Introduction</b>          |         |                                                                                                                                                                                                                       |                            |
| Background/rationale         | 2       | Explain the scientific background and rationale for the investigation being reported                                                                                                                                  | 5                          |
| Objectives                   | 3       | State specific objectives, including any prespecified hypotheses                                                                                                                                                      | 5                          |
| <b>Methods</b>               |         |                                                                                                                                                                                                                       |                            |
| Study design                 | 4       | Present key elements of study design early in the paper                                                                                                                                                               | 6                          |
| Setting                      | 5       | Describe the setting, locations, and relevant dates, including periods of recruitment, exposure, follow-up, and data collection                                                                                       | 6-7                        |
| Participants                 | 6       | (a) Give the eligibility criteria, and the sources and methods of selection of participants. Describe methods of follow-up<br><br>(b) For matched studies, give matching criteria and number of exposed and unexposed | 6, Figure 1 - Flow diagram |
| Variables                    | 7       | Clearly define all outcomes, exposures, predictors, potential confounders, and effect modifiers. Give diagnostic criteria, if applicable                                                                              | 6-7                        |
| Data sources/<br>measurement | 8*      | For each variable of interest, give sources of data and details of methods of assessment (measurement). Describe comparability of assessment methods if there is more than one group                                  | 6-7                        |
| Bias                         | 9       | Describe any efforts to address potential sources of bias                                                                                                                                                             |                            |
| Study size                   | 10      | Explain how the study size was arrived at                                                                                                                                                                             | Figure 1 - Flow diagram    |
| Quantitative variables       | 11      | Explain how quantitative variables were handled in the analyses. If applicable, describe which groupings were chosen and why                                                                                          | 8 (statistical methods)    |
| Statistical methods          | 12      | (a) Describe all statistical methods, including those used to control for confounding<br><br>(b) Describe any methods used to examine subgroups and interactions                                                      | 8 (statistical methods)    |

|    |                  |                                                                                                                                                                                                       |                               |
|----|------------------|-------------------------------------------------------------------------------------------------------------------------------------------------------------------------------------------------------|-------------------------------|
| 1  |                  | (c) Explain how missing data were addressed                                                                                                                                                           | 8, statistical methods        |
| 2  |                  |                                                                                                                                                                                                       |                               |
| 3  |                  |                                                                                                                                                                                                       |                               |
| 4  |                  | (d) If applicable, explain how loss to follow-up was addressed                                                                                                                                        |                               |
| 5  |                  |                                                                                                                                                                                                       |                               |
| 6  |                  | (e) Describe any sensitivity analyses                                                                                                                                                                 |                               |
| 7  |                  |                                                                                                                                                                                                       |                               |
| 8  | <b>Results</b>   |                                                                                                                                                                                                       |                               |
| 9  |                  |                                                                                                                                                                                                       |                               |
| 10 | Participants     | 13* (a) Report numbers of individuals at each stage of study—eg numbers potentially eligible, examined for eligibility, confirmed eligible, included in the study, completing follow-up, and analysed | Figure 1 (Flow diagram)       |
| 11 |                  |                                                                                                                                                                                                       |                               |
| 12 |                  |                                                                                                                                                                                                       |                               |
| 13 |                  | (b) Give reasons for non-participation at each stage                                                                                                                                                  | 6, Figure 1 (Flow diagram)    |
| 14 |                  |                                                                                                                                                                                                       |                               |
| 15 |                  | (c) Consider use of a flow diagram                                                                                                                                                                    | Figure 1 (Flow diagram)       |
| 16 |                  |                                                                                                                                                                                                       |                               |
| 17 | Descriptive data | 14* (a) Give characteristics of study participants (eg demographic, clinical, social) and information on exposures and potential confounders                                                          | 8, Table 1, Table 2, Figure 2 |
| 18 |                  |                                                                                                                                                                                                       |                               |
| 19 |                  |                                                                                                                                                                                                       |                               |
| 20 |                  | (b) Indicate number of participants with missing data for each variable of interest                                                                                                                   | 8, statistical methods        |
| 21 |                  |                                                                                                                                                                                                       |                               |
| 22 |                  | (c) Summarise follow-up time (eg, average and total amount)                                                                                                                                           | 8, Title                      |
| 23 |                  |                                                                                                                                                                                                       |                               |
| 24 | Outcome data     | 15* Report numbers of outcome events or summary measures over time                                                                                                                                    | 8-9, Table 1                  |
| 25 |                  |                                                                                                                                                                                                       |                               |
| 26 |                  |                                                                                                                                                                                                       |                               |
| 27 |                  |                                                                                                                                                                                                       |                               |
| 28 |                  |                                                                                                                                                                                                       |                               |
| 29 |                  |                                                                                                                                                                                                       |                               |
| 30 |                  |                                                                                                                                                                                                       |                               |
| 31 |                  |                                                                                                                                                                                                       |                               |
| 32 |                  |                                                                                                                                                                                                       |                               |
| 33 |                  |                                                                                                                                                                                                       |                               |
| 34 |                  |                                                                                                                                                                                                       |                               |
| 35 |                  |                                                                                                                                                                                                       |                               |
| 36 |                  |                                                                                                                                                                                                       |                               |
| 37 |                  |                                                                                                                                                                                                       |                               |
| 38 |                  |                                                                                                                                                                                                       |                               |
| 39 |                  |                                                                                                                                                                                                       |                               |
| 40 |                  |                                                                                                                                                                                                       |                               |
| 41 |                  |                                                                                                                                                                                                       |                               |
| 42 |                  |                                                                                                                                                                                                       |                               |
| 43 |                  |                                                                                                                                                                                                       |                               |
| 44 |                  |                                                                                                                                                                                                       |                               |
| 45 |                  |                                                                                                                                                                                                       |                               |
| 46 |                  |                                                                                                                                                                                                       |                               |
| 47 |                  |                                                                                                                                                                                                       |                               |
| 48 |                  |                                                                                                                                                                                                       |                               |
| 49 |                  |                                                                                                                                                                                                       |                               |
| 50 |                  |                                                                                                                                                                                                       |                               |
| 51 |                  |                                                                                                                                                                                                       |                               |
| 52 |                  |                                                                                                                                                                                                       |                               |
| 53 |                  |                                                                                                                                                                                                       |                               |
| 54 |                  |                                                                                                                                                                                                       |                               |
| 55 |                  |                                                                                                                                                                                                       |                               |
| 56 |                  |                                                                                                                                                                                                       |                               |
| 57 |                  |                                                                                                                                                                                                       |                               |
| 58 |                  |                                                                                                                                                                                                       |                               |
| 59 |                  |                                                                                                                                                                                                       |                               |
| 60 |                  |                                                                                                                                                                                                       |                               |

|                                                 |                          |    |                                                                                                                                                                                                                                                                                                                                                                                                                       |                            |
|-------------------------------------------------|--------------------------|----|-----------------------------------------------------------------------------------------------------------------------------------------------------------------------------------------------------------------------------------------------------------------------------------------------------------------------------------------------------------------------------------------------------------------------|----------------------------|
| 1<br>2<br>3<br>4<br>5<br>6<br>7<br>8<br>9<br>10 | Main results             | 16 | (a) Give unadjusted estimates and, if applicable, confounder-adjusted estimates and their precision (eg, 95% confidence interval). Make clear which confounders were adjusted for and why they were included<br><br>(b) Report category boundaries when continuous variables were categorized<br><br>(c) If relevant, consider translating estimates of relative risk into absolute risk for a meaningful time period | 10-11, Table 3, table 4    |
| 11<br>12<br>13<br>14                            | Other analyses           | 17 | Report other analyses done—eg analyses of subgroups and interactions, and sensitivity analyses                                                                                                                                                                                                                                                                                                                        | 8, Supplementary Table 1-4 |
| 15                                              | <b>Discussion</b>        |    |                                                                                                                                                                                                                                                                                                                                                                                                                       |                            |
| 16<br>17<br>18                                  | Key results              | 18 | Summarise key results with reference to study objectives                                                                                                                                                                                                                                                                                                                                                              | 13                         |
| 19<br>20<br>21<br>22                            | Limitations              | 19 | Discuss limitations of the study, taking into account sources of potential bias or imprecision. Discuss both direction and magnitude of any potential bias                                                                                                                                                                                                                                                            | 13,14                      |
| 23<br>24<br>25<br>26                            | Interpretation           | 20 | Give a cautious overall interpretation of results considering objectives, limitations, multiplicity of analyses, results from similar studies, and other relevant evidence                                                                                                                                                                                                                                            | 13,16                      |
| 27<br>28<br>29                                  | Generalisability         | 21 | Discuss the generalisability (external validity) of the study results                                                                                                                                                                                                                                                                                                                                                 | 15                         |
| 30                                              | <b>Other information</b> |    |                                                                                                                                                                                                                                                                                                                                                                                                                       |                            |
| 31<br>32<br>33<br>34<br>35                      | Funding                  | 22 | Give the source of funding and the role of the funders for the present study and, if applicable, for the original study on which the present article is based                                                                                                                                                                                                                                                         |                            |

36  
37  
38  
39  
40  
41  
42  
43  
44  
45  
46  
47  
48  
49  
50  
51  
52  
53  
54  
55  
56  
57  
58  
59  
60

\*Give information separately for exposed and unexposed groups.

**Note:** An Explanation and Elaboration article discusses each checklist item and gives methodological background and published examples of transparent reporting. The STROBE checklist is best used in conjunction with this article (freely available on the Web sites of PLoS Medicine at <http://www.plosmedicine.org/>, Annals of Internal Medicine at <http://www.annals.org/>, and Epidemiology at <http://www.epidem.com/>). Information on the STROBE Initiative is available at <http://www.strobe-statement.org>.
