# Supplementary material for: Sociodemographic and lifestyle predictors of incident hospital admissions with multimorbidity in a general population, 1999–2019: the EPIC-Norfolk cohort
Source: PubMed Central journal article supplement (PMC7509968; doi:10.1136/bmjopen-2020-042115), 2020-09-22
Supplement: bmjopen-2020-042115supp001.pdf [file bmjopen-2020-042115supp001.pdf]

## **Sociodemographic and lifestyle predictors of incident hospital admissions with multimorbidity in a general population 1999–2019: the EPIC-Norfolk cohort**

### **Supplementary material**

Supplementary Table S1 | Charlson Comorbidity Index, ICD-10 codes and weighting

Supplementary Table S2 | Descriptive characteristics at TP2 in 9814 men and women aged 48–92 by 10-year Charlson Comorbidity Index, 2009–2019

Supplementary Table S3 | Multivariable logistic regression of risk factors for Charlson 5-year and 10-year hospital admissions with multimorbidity at TP2 in 9814 men and women

Supplementary Table S4 | Multivariable logistic regression of risk factors excluding participants with prevalent CVD, cancer or diabetes at TP2 for Charlson 5-year and 10-year hospital admissions with multimorbidity at TP2 in 8185 men and women

## Supplementary Table S1 | Charlson Comorbidity Index, ICD-10 codes and weighting

|                                                                                     | ICD-10 codes                                                                                                                                                                  |
|-------------------------------------------------------------------------------------|-------------------------------------------------------------------------------------------------------------------------------------------------------------------------------|
| Myocardial infarction                                                               | I21.x, I22.x, I25.2                                                                                                                                                           |
| Congestive heart failure                                                            | I09.9, I11.0, I13.0, I13.2, I25.5, I42.0, I42.5–I42.9, I43.x, I50.x, P29.0                                                                                                    |
| Peripheral vascular disease                                                         | I70.x, I71.x, I73.1, I73.8, I73.9, I77.1, I79.0, I79.2, K55.1, K55.8, K55.9, Z95.8, Z95.9                                                                                     |
| Cerebrovascular disease                                                             | G45.x, G46.x, H34.0, I60.x–I69.x                                                                                                                                              |
| Dementia                                                                            | F00.x–F03.x, F05.1, G30.x, G31.1                                                                                                                                              |
| Chronic pulmonary disease                                                           | I27.8, I27.9, J40.x–J47.x, J60.x–J67.x, J68.4, J70.1, J70.3                                                                                                                   |
| Rheumatic disease                                                                   | M05.x, M06.x, M31.5, M32.x–M34.x, M35.1, M35.3, M36.0                                                                                                                         |
| Peptic ulcer disease                                                                | K25.x–K28.x                                                                                                                                                                   |
| Mild liver disease                                                                  | B18.x, K70.0–K70.3, K70.9, K71.3–K71.5, K71.7, K73.x, K74.x, K76.0, K76.2–K76.4, K76.8, K76.9, Z94.4                                                                          |
| Diabetes without chronic complication                                               | E10.0, E10.1, E10.6, E10.8, E10.9, E11.0, E11.1, E11.6, E11.8, E11.9, E12.0, E12.1, E12.6, E12.8, E12.9, E13.0, E13.1, E13.6, E13.8, E13.9, E14.0, E14.1, E14.6, E14.8, E14.9 |
| Diabetes with chronic complication                                                  | E10.2–E10.5, E10.7, E11.2–E11.5, E11.7, E12.2–E12.5, E12.7, E13.2–E13.5, E13.7, E14.2–E14.5, E14.7                                                                            |
| Hemiplegia or paraplegia                                                            | G04.1, G11.4, G80.1, G80.2, G81.x, G82.x, G83.0–G83.4, G83.9                                                                                                                  |
| Renal disease                                                                       | I12.0, I13.1, N03.2–N03.7, N05.2–N05.7, N18.x, N19.x, N25.0, Z49.0–Z49.2, Z94.0, Z99.2                                                                                        |
| Any malignancy, including lymphoma and leukaemia, except malignant neoplasm of skin | C00.x–C26.x, C30.x–C34.x, C37.x–C41.x, C43.x, C45.x–C58.x, C60.x–C76.x, C81.x–C85.x, C88.x, C90.x–C97.x                                                                       |
| Moderate or severe liver disease                                                    | I85.0, I85.9, I86.4, I98.2, K70.4, K71.1, K72.1, K72.9, K76.5, K76.6, K76.7                                                                                                   |
| Metastatic solid tumour                                                             | C77.x–C80.x                                                                                                                                                                   |
| AIDS/HIV                                                                            | B20.x–B22.x, B24.x                                                                                                                                                            |

All comorbidities are assigned a weight of 1 except hemiplegia/paraplegia, renal disease, and malignancies (weight=2); moderate/severe liver disease (weight=3); metastatic solid tumour and AIDS/HIV (weight=6). For diseases with two levels of severity (liver disease, diabetes and cancer), the less severe version is assigned weight=0 if the more severe version is also present in a patient. Reproduced from documentation for the 'comorbidity' R package (Gasparini, 2019)

**Supplementary Table S2 | Descriptive characteristics at TP2 in 9814 men and women aged 48–92 by 10-year Charlson Comorbidity Index, 2009–2019**

|                                                      | Total       | No admissions | CCI=0       | CCI=1       | CCI=2       | CCI≥3       |
|------------------------------------------------------|-------------|---------------|-------------|-------------|-------------|-------------|
| <b>Hospital duration 2009–2019, days</b>             |             |               |             |             |             |             |
| Mean ±SD                                             | 17.7 ±36.2  | 0.0 ±0.0      | 6.5 ±14.0   | 19.3 ±42.8  | 26.1 ±42.2  | 46.3 ±48.1  |
| <b>Total hospital admissions 2009–2019</b>           |             |               |             |             |             |             |
| Mean ±SD                                             | 4.4 ±7.9    | 0.0 ±0.0      | 2.8 ±3.0    | 4.5 ±6.0    | 6.0 ±6.7    | 10.1 ±13.5  |
| <b>Age at TP2, years</b>                             |             |               |             |             |             |             |
| Mean ±SD                                             | 69.4 ±8.4   | 65.1 ±7.7     | 67.6 ±7.7   | 70.5 ±8.1   | 71.7 ±8.1   | 74.1 ±7.8   |
| <b>Sex (n (%))</b>                                   |             |               |             |             |             |             |
| Men                                                  | 4252        | 695 (16.3)    | 1294 (30.4) | 631 (14.8)  | 558 (13.1)  | 1074 (25.3) |
| Women                                                | 5562        | 1166 (21.0)   | 1956 (35.2) | 914 (16.4)  | 618 (11.1)  | 908 (16.3)  |
| <b>Body mass index at TP2, kg/m<sup>2</sup></b>      |             |               |             |             |             |             |
| Mean ±SD                                             | 26.9 ±4.3   | 26.2 ±4.3     | 26.5 ±4.0   | 27.3 ±4.4   | 27.3 ±4.5   | 27.7 ±4.5   |
| <b>Cigarette smoking at TP2 (n (%))</b>              |             |               |             |             |             |             |
| Current                                              | 442         | 88 (19.9)     | 116 (26.2)  | 65 (14.7)   | 79 (17.9)   | 94 (21.3)   |
| Former                                               | 4508        | 755 (16.7)    | 1375 (30.5) | 741 (16.4)  | 565 (12.5)  | 1072 (23.8) |
| Never                                                | 4864        | 1018 (20.9)   | 1759 (36.2) | 739 (15.2)  | 532 (10.9)  | 816 (16.8)  |
| <b>Social class dichotomised (n (%))</b>             |             |               |             |             |             |             |
| Non-manual                                           | 6294        | 1205 (19.1)   | 2127 (33.8) | 993 (15.8)  | 749 (11.9)  | 1220 (19.4) |
| Manual                                               | 3411        | 636 (18.6)    | 1087 (31.9) | 528 (15.5)  | 424 (12.4)  | 736 (21.6)  |
| <b>Level of education (n (%))</b>                    |             |               |             |             |             |             |
| Higher level                                         | 7025        | 1460 (20.8)   | 2419 (34.4) | 1074 (15.3) | 791 (11.3)  | 1281 (18.2) |
| Lower level                                          | 2787        | 401 (14.4)    | 830 (29.8)  | 471 (16.9)  | 385 (13.8)  | 700 (25.1)  |
| <b>Simple physical activity index at TP2 (n (%))</b> |             |               |             |             |             |             |
| Inactive                                             | 3924        | 592 (15.1)    | 1072 (27.3) | 687 (17.5)  | 545 (13.9)  | 1028 (26.2) |
| Moderately inactive                                  | 2682        | 555 (20.7)    | 940 (35.0)  | 404 (15.1)  | 311 (11.6)  | 472 (17.6)  |
| Moderately active                                    | 1654        | 387 (23.4)    | 604 (36.5)  | 231 (14.0)  | 167 (10.1)  | 265 (16.0)  |
| Active                                               | 1442        | 313 (21.7)    | 601 (41.7)  | 195 (13.5)  | 139 (9.6)   | 194 (13.5)  |
| <b>Alcohol intake at TP2, units per week</b>         |             |               |             |             |             |             |
| Mean ±SD                                             | 5.7 ±8.2    | 6.3 ±8.0      | 5.8 ±7.9    | 5.5 ±8.3    | 5.3 ±7.8    | 5.5 ±9.1    |
| <b>Plasma vitamin C at TP2, µmol/L</b>               |             |               |             |             |             |             |
| Mean ±SD                                             | 63.0 ±22.2  | 66.0 ±21.5    | 65.7 ±21.6  | 63.2 ±22.8  | 59.9 ±22.4  | 57.7 ±21.9  |
| <b>Systolic blood pressure at TP2, mmHg</b>          |             |               |             |             |             |             |
| Mean ±SD                                             | 136.5 ±17.1 | 134.7 ±15.9   | 135.8 ±16.3 | 138.5 ±18.4 | 136.6 ±16.8 | 138.0 ±18.1 |
| <b>Total cholesterol at TP2, mmol/L</b>              |             |               |             |             |             |             |
| Mean ±SD                                             | 5.4 ±1.1    | 5.6 ±1.1      | 5.5 ±1.1    | 5.3 ±1.1    | 5.2 ±1.2    | 5.0 ±1.2    |
| <b>Prevalent heart attack at TP2 (n (%))</b>         |             |               |             |             |             |             |
| No reported heart attack at TP2                      | 9455        | 1833 (19.4)   | 3211 (34.0) | 1499 (15.9) | 1116 (11.8) | 1796 (19.0) |
| Self-reported heart attack at TP2                    | 359         | 28 (7.8)      | 39 (10.9)   | 46 (12.8)   | 60 (16.7)   | 186 (51.8)  |
| <b>Prevalent stroke at TP2 (n (%))</b>               |             |               |             |             |             |             |
| No reported stroke at TP2                            | 9577        | 1843 (19.2)   | 3215 (33.6) | 1510 (15.8) | 1141 (11.9) | 1868 (19.5) |
| Self-reported stroke at TP2                          | 237         | 18 (7.6)      | 35 (14.8)   | 35 (14.8)   | 35 (14.8)   | 114 (48.1)  |
| <b>Prevalent cancer at TP2 (n (%))</b>               |             |               |             |             |             |             |
| No reported cancer at TP2                            | 8888        | 1744 (19.6)   | 2987 (33.6) | 1398 (15.7) | 1052 (11.8) | 1707 (19.2) |
| Self-reported cancer at TP2                          | 926         | 117 (12.6)    | 263 (28.4)  | 147 (15.9)  | 124 (13.4)  | 275 (29.7)  |
| <b>Prevalent diabetes at TP2 (n (%))</b>             |             |               |             |             |             |             |
| No reported diabetes at TP2                          | 9477        | 1834 (19.4)   | 3238 (34.2) | 1477 (15.6) | 1124 (11.9) | 1804 (19.0) |
| Self-reported diabetes at TP2                        | 337         | 27 (8.0)      | 12 (3.6)    | 68 (20.2)   | 52 (15.4)   | 178 (52.8)  |

### Supplementary Table S3 | Multivariable logistic regression of risk factors for Charlson 5-year and 10-year hospital admissions with multimorbidity at TP2 in 9814 men and women

|                                   | Charlson 5-year multimorbidity †, 2009–2014<br>OR (95% CI) | p value | Charlson 10-year multimorbidity †, 2009–2019<br>OR (95% CI) | p value |
|-----------------------------------|------------------------------------------------------------|---------|-------------------------------------------------------------|---------|
| <b>Model 1</b>                    |                                                            |         |                                                             |         |
| Male sex                          | 1.67 (1.46–1.91)                                           | < 0.001 | 1.72 (1.55–1.91)                                            | < 0.001 |
| Age per 10 years                  | 2.35 (2.16–2.56)                                           | < 0.001 | 2.36 (2.21–2.53)                                            | < 0.001 |
| Manual social class at baseline   | 1.02 (0.88–1.18)                                           | 0.774   | 1.11 (0.99–1.24)                                            | 0.072   |
| Lower education level at baseline | 1.12 (0.96–1.30)                                           | 0.154   | 1.26 (1.12–1.42)                                            | < 0.001 |
| <b>Model 2</b>                    |                                                            |         |                                                             |         |
| Male sex                          | 1.60 (1.39–1.84)                                           | < 0.001 | 1.65 (1.48–1.84)                                            | < 0.001 |
| Age per 10 years                  | 2.19 (2.00–2.39)                                           | < 0.001 | 2.22 (2.07–2.38)                                            | < 0.001 |
| Manual social class at baseline   | 1.01 (0.87–1.18)                                           | 0.850   | 1.11 (0.99–1.24)                                            | 0.082   |
| Lower education level at baseline | 1.10 (0.94–1.29)                                           | 0.215   | 1.25 (1.11–1.41)                                            | < 0.001 |
| Prevalent CVD                     | 2.25 (1.78–2.81)                                           | < 0.001 | 2.60 (2.13–3.18)                                            | < 0.001 |
| Prevalent cancer                  | 1.83 (1.50–2.22)                                           | < 0.001 | 1.61 (1.37–1.90)                                            | < 0.001 |
| Prevalent diabetes                | 3.96 (3.08–5.08)                                           | < 0.001 | 3.91 (3.09–4.96)                                            | < 0.001 |
| <b>Model 3</b>                    |                                                            |         |                                                             |         |
| Male sex                          | 1.44 (1.24–1.67)                                           | < 0.001 | 1.52 (1.35–1.71)                                            | < 0.001 |
| Age per 10 years                  | 2.14 (1.95–2.35)                                           | < 0.001 | 2.23 (2.07–2.39)                                            | < 0.001 |
| Manual social class at baseline   | 0.97 (0.83–1.13)                                           | 0.692   | 1.07 (0.95–1.20)                                            | 0.287   |
| Lower education level at baseline | 1.04 (0.89–1.22)                                           | 0.598   | 1.20 (1.06–1.35)                                            | 0.004   |
| Current smoker                    | 1.44 (1.02–1.99)                                           | 0.032   | 1.45 (1.11–1.86)                                            | 0.005   |
| BMI>30 kg/m <sup>2</sup>          | 1.38 (1.17–1.63)                                           | < 0.001 | 1.54 (1.35–1.75)                                            | < 0.001 |
| Alcohol intake, units per week    | 1.00 (0.99–1.01)                                           | 0.611   | 1.00 (0.99–1.01)                                            | 0.664   |
| Physically inactive               | 1.30 (1.12–1.50)                                           | < 0.001 | 1.13 (1.01–1.26)                                            | 0.034   |
| Plasma vitamin C per SD           | 0.80 (0.74–0.87)                                           | < 0.001 | 0.83 (0.79–0.88)                                            | < 0.001 |
| Prevalent CVD                     | 2.11 (1.67–2.64)                                           | < 0.001 | 2.46 (2.01–3.02)                                            | < 0.001 |
| Prevalent cancer                  | 1.81 (1.48–2.20)                                           | < 0.001 | 1.61 (1.36–1.89)                                            | < 0.001 |
| Prevalent diabetes                | 3.55 (2.75–4.56)                                           | < 0.001 | 3.47 (2.74–4.41)                                            | < 0.001 |
| <b>Model 4</b>                    |                                                            |         |                                                             |         |
| Male sex                          | 1.35 (1.15–1.58)                                           | < 0.001 | 1.41 (1.25–1.60)                                            | < 0.001 |
| Age per 10 years                  | 2.11 (1.92–2.32)                                           | < 0.001 | 2.20 (2.04–2.37)                                            | < 0.001 |
| Manual social class at baseline   | 0.97 (0.83–1.13)                                           | 0.692   | 1.07 (0.95–1.20)                                            | 0.287   |
| Lower education level at baseline | 1.04 (0.89–1.22)                                           | 0.609   | 1.20 (1.06–1.35)                                            | 0.004   |
| Current smoker                    | 1.43 (1.02–1.98)                                           | 0.034   | 1.44 (1.10–1.85)                                            | 0.006   |
| BMI>30 kg/m <sup>2</sup>          | 1.37 (1.16–1.62)                                           | < 0.001 | 1.53 (1.34–1.74)                                            | < 0.001 |
| Alcohol intake, units per week    | 1.00 (0.99–1.01)                                           | 0.449   | 1.00 (1.00–1.01)                                            | 0.416   |
| Physically inactive               | 1.29 (1.12–1.50)                                           | < 0.001 | 1.13 (1.01–1.26)                                            | 0.038   |
| Plasma vitamin C per SD           | 0.81 (0.75–0.87)                                           | < 0.001 | 0.84 (0.79–0.89)                                            | < 0.001 |
| Systolic blood pressure per SD    | 0.99 (0.92–1.07)                                           | 0.854   | 0.99 (0.94–1.05)                                            | 0.769   |
| Total cholesterol per SD          | 0.91 (0.84–0.98)                                           | 0.014   | 0.89 (0.84–0.95)                                            | < 0.001 |
| Prevalent CVD                     | 2.02 (1.60–2.54)                                           | < 0.001 | 2.34 (1.91–2.87)                                            | < 0.001 |
| Prevalent cancer                  | 1.81 (1.48–2.20)                                           | < 0.001 | 1.60 (1.36–1.89)                                            | < 0.001 |
| Prevalent diabetes                | 3.28 (2.52–4.24)                                           | < 0.001 | 3.16 (2.48–4.03)                                            | < 0.001 |

† Charlson Comorbidity Index ≥3 vs Charlson Comorbidity Index ≤2 or no hospital admission.

**Supplementary Table S4 | Multivariable logistic regression of risk factors excluding participants with prevalent CVD, cancer or diabetes at TP2 for 5-year and 10-year hospital admissions with multimorbidity at TP2 in 8185 men and women**

|                                   | 5-year follow-up period †, 2009–2014<br>OR (95% CI) | p value | 10-year follow-up period †, 2009–2019<br>OR (95% CI) | p value |
|-----------------------------------|-----------------------------------------------------|---------|------------------------------------------------------|---------|
| <b>Model 1</b>                    |                                                     |         |                                                      |         |
| Male sex                          | 1.44 (1.22–1.70)                                    | < 0.001 | 1.55 (1.37–1.75)                                     | < 0.001 |
| Age per 10 years                  | 2.36 (2.13–2.62)                                    | < 0.001 | 2.39 (2.21–2.58)                                     | < 0.001 |
| Manual social class at baseline   | 0.99 (0.82–1.18)                                    | 0.888   | 1.11 (0.97–1.27)                                     | 0.122   |
| Lower education level at baseline | 1.12 (0.93–1.36)                                    | 0.220   | 1.26 (1.09–1.44)                                     | 0.001   |
| <b>Model 2</b>                    |                                                     |         |                                                      |         |
| Male sex                          | 1.25 (1.05–1.50)                                    | 0.015   | 1.39 (1.22–1.59)                                     | < 0.001 |
| Age per 10 years                  | 2.36 (2.12–2.63)                                    | < 0.001 | 2.43 (2.24–2.64)                                     | < 0.001 |
| Manual social class at baseline   | 0.93 (0.78–1.12)                                    | 0.471   | 1.06 (0.93–1.22)                                     | 0.373   |
| Lower education level at baseline | 1.06 (0.88–1.29)                                    | 0.518   | 1.21 (1.05–1.39)                                     | 0.008   |
| Current smoker                    | 1.81 (1.23–2.59)                                    | 0.002   | 1.66 (1.24–2.20)                                     | < 0.001 |
| BMI>30 kg/m <sup>2</sup>          | 1.42 (1.16–1.73)                                    | < 0.001 | 1.60 (1.38–1.86)                                     | < 0.001 |
| Alcohol intake, units per week    | 1.01 (1.00–1.02)                                    | 0.238   | 1.01 (1.00–1.01)                                     | 0.109   |
| Physically inactive               | 1.18 (0.99–1.41)                                    | 0.061   | 1.10 (0.97–1.26)                                     | 0.138   |
| Plasma vitamin C per SD           | 0.79 (0.72–0.86)                                    | < 0.001 | 0.83 (0.77–0.88)                                     | < 0.001 |
| <b>Model 3</b>                    |                                                     |         |                                                      |         |
| Male sex                          | 1.16 (0.96–1.40)                                    | 0.135   | 1.29 (1.12–1.49)                                     | < 0.001 |
| Age per 10 years                  | 2.29 (2.05–2.57)                                    | < 0.001 | 2.39 (2.20–2.60)                                     | < 0.001 |
| Manual social class at baseline   | 0.93 (0.77–1.12)                                    | 0.446   | 1.06 (0.93–1.21)                                     | 0.385   |
| Lower education level at baseline | 1.06 (0.88–1.28)                                    | 0.534   | 1.21 (1.05–1.39)                                     | 0.009   |
| Current smoker                    | 1.81 (1.23–2.59)                                    | 0.002   | 1.64 (1.23–2.18)                                     | < 0.001 |
| BMI>30 kg/m <sup>2</sup>          | 1.39 (1.14–1.70)                                    | 0.001   | 1.59 (1.36–1.84)                                     | < 0.001 |
| Alcohol intake, units per week    | 1.01 (1.00–1.02)                                    | 0.163   | 1.01 (1.00–1.02)                                     | 0.054   |
| Physically inactive               | 1.18 (0.99–1.40)                                    | 0.071   | 1.10 (0.96–1.25)                                     | 0.161   |
| Plasma vitamin C per SD           | 0.79 (0.72–0.87)                                    | < 0.001 | 0.83 (0.77–0.89)                                     | < 0.001 |
| Systolic blood pressure per SD    | 1.03 (0.95–1.12)                                    | 0.466   | 0.99 (0.93–1.06)                                     | 0.866   |
| Total cholesterol per SD          | 0.88 (0.80–0.96)                                    | 0.005   | 0.89 (0.83–0.95)                                     | < 0.001 |

† Charlson Comorbidity Index  $\geq 3$  vs Charlson  $\leq 2$  or no hospital admission.
